# Supplementary material for: Proteomic insights into the associations between obesity, lifestyle factors, and coronary artery disease
Source: PubMed Central journal article supplement (PMC10696760; doi:10.1186/s12916-023-03197-8), 2023-12-05
Supplement: 12916_2023_3197_MOESM2_ESM.pdf [file 12916_2023_3197_MOESM2_ESM.pdf]

# Supplementary materials for

## Proteomic insights into the associations between obesity, lifestyle factors, and coronary artery disease

### Table of Contents

|                                                                                                                                                       |     |
|-------------------------------------------------------------------------------------------------------------------------------------------------------|-----|
| <i>Supplemental Table 1. Adjustments in the GWAS on obesity and lifestyle factors.</i>                                                                | 2   |
| <i>Supplemental Table 2. Websites of the used GWAS datasets.</i>                                                                                      | 3   |
| <i>Supplemental Table 3. Detailed definitions of obesity measures and lifestyle factors.</i>                                                          | 4   |
| <i>Supplementary Table 4. The used genetic instrumental variables for obesity measures and lifestyle factors in Mendelian randomization analysis.</i> | 6   |
| <i>Supplemental Table 5. Sample overlap between used GWAS data sources.</i>                                                                           | 79  |
| <i>Supplemental Table 6. The bias and type 1 error rate caused by the sample overlap.</i>                                                             | 80  |
| <i>Supplemental Table 7. Posterior probability of H3 and H4 in colocalization analysis.</i>                                                           | 81  |
| <i>Supplemental Table 8. Associations of genetically predicted obesity measures with CAD in sensitivity analyses.</i>                                 | 82  |
| <i>Supplemental Table 9. Associations of genetically predicted smoking, alcohol use and coffee consumption with CAD in sensitivity analyses.</i>      | 83  |
| <i>Supplemental Table 10. Associations of genetically predicted sleep traits with CAD in sensitivity analyses.</i>                                    | 84  |
| <i>Supplemental Table 11. Associations of genetically predicted physical activity and sedentary behavior with CAD in sensitivity analyses.</i>        | 85  |
| <i>Supplemental Table 12. Associations of genetically predicted obesity and lifestyle factors with CAD in MR-PRESSO Analyses.</i>                     | 86  |
| <i>Supplemental Table 13. Associations of genetically predicted obesity measures with levels of MAP1LC3A.</i>                                         | 87  |
| <i>Supplemental Table 14. Associations of genetically predicted obesity measures with levels of ANGPTL4.</i>                                          | 88  |
| <i>Supplemental Table 15. Associations of genetically predicted obesity measures with levels of RPS6K1.</i>                                           | 89  |
| <i>Supplemental Table 16. Associations of genetically predicted obesity measures with levels of PCSK9.</i>                                            | 90  |
| <i>Supplemental Table 17. Associations of genetically predicted obesity measures with levels of ITPKA.</i>                                            | 91  |
| <i>Supplemental Table 18. Associations of genetically predicted physical activity with levels of circulating proteins.</i>                            | 92  |
| <i>Supplemental Table 19. Associations of genetically predicted sedentary behavior with levels of circulating proteins.</i>                           | 93  |
| <i>Supplemental Table 20. Associations of genetically predicted smoking with levels of circulating proteins.</i>                                      | 94  |
| <i>Supplemental Table 21. Associations of genetically predicted coffee and caffeine consumption with levels of circulating proteins.</i>              | 95  |
| <i>Supplemental Table 22. The estimates of the indirect effect and proportion mediated.</i>                                                           | 96  |
| <i>Supplemental Table 23. The statistical power of Mendelian randomization analyses.</i>                                                              | 100 |

**Supplemental Table 1.** Adjustments in the GWAS on obesity and lifestyle factors.

| <b>Trait</b>                           | <b>Adjustments</b>                                                                                                                         | <b>PMID</b> |
|----------------------------------------|--------------------------------------------------------------------------------------------------------------------------------------------|-------------|
| Body mass index                        | Age, sex, and genetic 1–5 principal components                                                                                             | 30239722    |
| Waist-to-hip ratio                     | Age, sex, and genetic 1–5 principal components                                                                                             | 30239722    |
| Waist circumference                    | Age and study-specific covariates                                                                                                          | 25673412    |
| Visceral adipose tissue                | Age, sex, batch and the first ten principal components                                                                                     | 31501611    |
| Smoking initiation                     | Age, sex, and the first ten genetic principal components                                                                                   | 30643251    |
| Lifetime smoking index                 | Genotyping chip and sex                                                                                                                    | 31689377    |
| Alcohol drinking                       | Age, sex, and the first ten genetic principal components                                                                                   | 30643251    |
| Alcohol dependence                     | Sex and 1-5 principal components                                                                                                           | 30482948    |
| Coffee consumption                     | Age, sex, body mass index, total energy, proportion of typical food intake, and 20 genetic principal components                            | 31046077    |
| Caffeine consumption                   | Age, sex, study-site, fasting status, smoking status, and genetic principal components                                                     | 27702941    |
| Moderate-to-vigorous physical activity | Age, sex, age-squared, principal components reflecting population structure                                                                | 36071172    |
| Vigorous physical activity             | Age, sex, genotyping chip, first ten genomic principal components, and center                                                              | 29899525    |
| Sedentary behavior                     | Age-squared, age, sex, age-sex interaction, and the first 30 principal components                                                          | 32317632    |
| Leisure screen time                    | Age, sex, age-squared, principal components reflecting population structure                                                                | 36071172    |
| Sleep duration                         | Age, sex, and 10 principal components                                                                                                      | 30846698    |
| Insomnia                               | Age, sex, genotype array, and 10 genetic principal components in the UK Biobank; age, sex and the top five principal components in 23andMe | 30804565    |

**Supplemental Table 2.** Websites of the used GWAS datasets.

| <b>Trait</b>            | <b>Website</b>                                                                                                                                                                                                                                                                                              |
|-------------------------|-------------------------------------------------------------------------------------------------------------------------------------------------------------------------------------------------------------------------------------------------------------------------------------------------------------|
| Circulating protein     | <a href="https://www.decode.com/summarydata/">https://www.decode.com/summarydata/</a>                                                                                                                                                                                                                       |
| CAD (Consortia)         | <a href="http://www.cardiogramplusc4d.org/">http://www.cardiogramplusc4d.org/</a>                                                                                                                                                                                                                           |
| CAD (FinnGen)           | <a href="https://www.finnngen.fi/">https://www.finnngen.fi/</a>                                                                                                                                                                                                                                             |
| Body mass index         | <a href="https://zenodo.org/records/1251813">https://zenodo.org/records/1251813</a>                                                                                                                                                                                                                         |
| Waist-to-hip ratio      | <a href="https://zenodo.org/records/1251813">https://zenodo.org/records/1251813</a>                                                                                                                                                                                                                         |
| Visceral adipose tissue | <a href="https://www.ebi.ac.uk/gwas/publications/31501611">https://www.ebi.ac.uk/gwas/publications/31501611</a>                                                                                                                                                                                             |
| Waist circumference     | <a href="https://portals.broadinstitute.org/collaboration/giant/index.php/GIANT_consortium_data_files#GWAS_Anthropometric_2015_Waist_Summary_Statistics">https://portals.broadinstitute.org/collaboration/giant/index.php/GIANT_consortium_data_files#GWAS_Anthropometric_2015_Waist_Summary_Statistics</a> |
| Smoking initiation      | <a href="https://genome.psych.umn.edu/index.php/GSCAN">https://genome.psych.umn.edu/index.php/GSCAN</a>                                                                                                                                                                                                     |
| Lifetime smoking index  | <a href="https://data.bris.ac.uk/data/dataset/10i96zb8gm0j81yz0q6ztei23d">https://data.bris.ac.uk/data/dataset/10i96zb8gm0j81yz0q6ztei23d</a>                                                                                                                                                               |
| Alcohol drinking        | <a href="https://genome.psych.umn.edu/index.php/GSCAN">https://genome.psych.umn.edu/index.php/GSCAN</a>                                                                                                                                                                                                     |
| Alcohol dependence      | <a href="http://www.med.unc.edu/pgc/results-and-downloads">http://www.med.unc.edu/pgc/results-and-downloads</a>                                                                                                                                                                                             |
| Coffee consumption      | <a href="https://digitalhub.northwestern.edu/users/mcc340">https://digitalhub.northwestern.edu/users/mcc340</a>                                                                                                                                                                                             |
| Caffeine consumption    | <a href="https://digitalhub.northwestern.edu/users/mcc340">https://digitalhub.northwestern.edu/users/mcc340</a>                                                                                                                                                                                             |
| Sports                  | <a href="https://www.ukbiobank.ac.uk/">https://www.ukbiobank.ac.uk/</a>                                                                                                                                                                                                                                     |
| MVPA                    | <a href="https://www.ebi.ac.uk/gwas/downloads/summary-statistics">https://www.ebi.ac.uk/gwas/downloads/summary-statistics</a>                                                                                                                                                                               |
| VPA                     | <a href="https://www.ukbiobank.ac.uk/">https://www.ukbiobank.ac.uk/</a>                                                                                                                                                                                                                                     |
| Sedentary behavior      | <a href="https://data.mendeley.com/datasets/mxjj6czsrd/1">https://data.mendeley.com/datasets/mxjj6czsrd/1</a>                                                                                                                                                                                               |
| Leisure screen time     | <a href="https://www.ebi.ac.uk/gwas/downloads/summary-statistics">https://www.ebi.ac.uk/gwas/downloads/summary-statistics</a>                                                                                                                                                                               |
| Sleep duration          | <a href="http://sleepdisordergenetics.org/">http://sleepdisordergenetics.org/</a>                                                                                                                                                                                                                           |
| Insomnia                | <a href="https://ctg.cncr.nl/software/summary_statistics">https://ctg.cncr.nl/software/summary_statistics</a>                                                                                                                                                                                               |

Note: CAD, coronary artery disease; MVPA, moderate to vigorous physical activity; VPA, vigorous physical activity.

**Supplemental Table 3.** Detailed definitions of obesity measures and lifestyle factors.

| <b>Trait</b>            | <b>Definition</b>                                                                                                                                                                                                                                                                                                                                                        |
|-------------------------|--------------------------------------------------------------------------------------------------------------------------------------------------------------------------------------------------------------------------------------------------------------------------------------------------------------------------------------------------------------------------|
| Body mass index         | The body mass divided by the square of the body height                                                                                                                                                                                                                                                                                                                   |
| Waist-to-hip ratio      | The measured circumference of the waist divided by the measured circumference of the hip.                                                                                                                                                                                                                                                                                |
| Visceral adipose tissue | The mass of visceral adipose tissue measured by Dual-energy X-ray absorptiometry                                                                                                                                                                                                                                                                                         |
| Waist circumference     | Obtained by measuring the abdomen at the level of the superior iliac crest with a tape measure                                                                                                                                                                                                                                                                           |
| Smoking initiation      | This is a binary phenotype. Code “2” for everyone in the study who reports ever being a regular smoker in their life (current or former). Code “1” for everyone who denies ever being a regular smoker in their life.                                                                                                                                                    |
| Lifetime smoking index  | The smoking measures were combined into a lifetime smoking index along with a simulated half-life ( $\tau$ ) constant. Half-life captures the exponentially decreasing effect of smoking at a given time on health outcomes. The value of half-life was determined by simulating the effects of lifetime smoking on lung cancer and overall mortality in the UK Biobank. |
| Alcohol drinking        | The average number of drinks a subject reports drinking each week, aggregated across all types of alcohol                                                                                                                                                                                                                                                                |
| Alcohol dependence      | Defined as meeting criteria for a DSM-IV2 diagnosis of alcohol dependence                                                                                                                                                                                                                                                                                                |
| Coffee consumption      | Total coffee consumption was based on the question ‘How many cups of coffee do you drink each day (include decaffeinated coffee)?’                                                                                                                                                                                                                                       |
| Caffeine consumption    | Measured by plasma caffeine-related metabolites (137X, 17X, 13X, 37X and 137U)                                                                                                                                                                                                                                                                                           |
| Sports                  | Defined as spending 2–3 days/week or more doing strenuous sports or other exercises for a duration of 15–30 min or greater                                                                                                                                                                                                                                               |
| MVPA                    | MVPA= ‘1’ if subjects report engaging in $\geq 1$ h/wk of leisure moderate/vigorous activity. These include activities with MET values of 3 or greater. Otherwise, MVPA= ‘0’.”                                                                                                                                                                                           |
| VPA                     | Participants were asked: “In a typical week, how many days did you do 10 min or more of vigorous physical activity? (Activities making you sweat or breathe hard such as fast cycling, aerobics, heavy lifting)”. Those who indicated 1 or more such days were then asked “How many minutes did you usually spend doing vigorous activities on a typical day”.           |
| Sedentary behavior      | Participants were asked three questions, “In a typical DAY, how many hours do you spend watching TV?”, “In a typical DAY, how many hours do you spend using the computer?” and “In a typical DAY, how many hours do you spend driving?”                                                                                                                                  |
| Leisure screen time     | The time spent watching TV as a quantitative trait, expressed in hours/day.                                                                                                                                                                                                                                                                                              |
| Sleep duration          | Participants were asked: About how many hours sleep do you get in every 24 h? (including naps), with responses in hour increments. Sleep duration was treated as a continuous variable                                                                                                                                                                                   |
| Insomnia                | Insomnia complaints were assessed by asking: “Do you have trouble falling asleep at night or do you wake up in the middle of the night?” with following four answers: “never/rarely”, “sometimes”, “usually”, or “prefer not to answer”. Insomnia cases were defined as participants who answered this question with “usually”                                           |

Note: For the construction of the lifetime smoking index, several smoking measures were combined into a lifetime smoking index along with a simulated half-life ( $\tau$ ) constant. The simulated half-life ( $\tau$ ) constant captures the exponentially decreasing effect of smoking at a given time on health outcomes. These values were used to fit the final model which is:

$$tsc^* = \max(tsc - \delta, 0)$$

$$dur^* = \max(dur + tsc - \delta, 0) - tsc^*$$

$$\text{lifetime smoking} = (1 - 0.5^{dur^*/\tau}) (0.5^{tsc^*/\tau}) \ln(int+1)$$

...where  $\tau$  = half-life,  $\delta$  = lag time, int = cigarettes per day, tss = time started smoking, tsc = time since cessation, dur = duration of smoking (either age-tss for current smokers or [age-tsc]-tss for former smokers). So, where  $\delta = 0$ ,  $tsc^* = tsc$  and consequently, the lifetime smoking calculation can be simplified to:

$$\text{Lifetime smoking index} = (1 - 0.5^{dur/\tau}) (0.5^{tsc/\tau}) \ln(int+1).$$

**Supplementary Table 4.** The used genetic instrumental variables for obesity measures and lifestyle factors in Mendelian randomization analysis.

| Phenotype | SNP        | CHR:POS     | EA | Beta   | SE     | EAF  | <i>P</i> | <i>F</i> -statistic |
|-----------|------------|-------------|----|--------|--------|------|----------|---------------------|
| BMI       | rs10044136 | 5:153546808 | G  | 0.0162 | 0.0017 | 0.43 | 3.1E-21  | 104                 |
| BMI       | rs10099330 | 8:143383694 | G  | 0.0119 | 0.0017 | 0.45 | 3.2E-12  | 57                  |
| BMI       | rs10116186 | 9:80532374  | G  | 0.0116 | 0.0019 | 0.56 | 1.6E-09  | 53                  |
| BMI       | rs10132280 | 14:25928179 | C  | 0.0214 | 0.0018 | 0.68 | 2.3E-33  | 162                 |
| BMI       | rs10203386 | 2:25136866  | A  | 0.0318 | 0.0017 | 0.41 | 1.4E-78  | 396                 |
| BMI       | rs1030015  | 7:78139581  | T  | 0.0109 | 0.0017 | 0.51 | 1.2E-10  | 48                  |
| BMI       | rs1045411  | 13:31033232 | C  | 0.0139 | 0.0019 | 0.69 | 6.7E-14  | 66                  |
| BMI       | rs1048303  | 7:100804140 | C  | 0.0110 | 0.0017 | 0.38 | 1.5E-10  | 46                  |
| BMI       | rs10497870 | 2:203970283 | A  | 0.0121 | 0.0016 | 0.53 | 2.0E-13  | 59                  |
| BMI       | rs10499694 | 7:50614173  | A  | 0.0130 | 0.0016 | 0.55 | 1.3E-15  | 67                  |
| BMI       | rs10510419 | 3:12426936  | G  | 0.0168 | 0.0023 | 0.86 | 2.2E-13  | 56                  |
| BMI       | rs10518269 | 19:31028666 | C  | 0.0173 | 0.0023 | 0.85 | 4.7E-14  | 61                  |
| BMI       | rs10744146 | 12:17212881 | G  | 0.0113 | 0.0017 | 0.48 | 2.5E-11  | 51                  |
| BMI       | rs10761247 | 9:96403367  | G  | 0.0113 | 0.0017 | 0.45 | 4.5E-11  | 51                  |
| BMI       | rs10761785 | 10:65318766 | G  | 0.0133 | 0.0016 | 0.48 | 3.5E-16  | 71                  |
| BMI       | rs10823893 | 10:53677313 | A  | 0.0124 | 0.0019 | 0.40 | 1.6E-10  | 60                  |
| BMI       | rs10858334 | 9:137989785 | G  | 0.0148 | 0.0025 | 0.11 | 4.9E-09  | 33                  |
| BMI       | rs10887584 | 10:88112323 | A  | 0.0126 | 0.0019 | 0.43 | 4.6E-11  | 63                  |
| BMI       | rs10920678 | 1:190239907 | A  | 0.0149 | 0.0016 | 0.49 | 7.2E-20  | 89                  |
| BMI       | rs10929925 | 2:6155557   | C  | 0.0142 | 0.0016 | 0.52 | 3.0E-18  | 81                  |
| BMI       | rs10938397 | 4:45182527  | G  | 0.0322 | 0.0016 | 0.45 | 2.4E-86  | 414                 |
| BMI       | rs10942267 | 5:80841914  | A  | 0.0148 | 0.0018 | 0.75 | 6.5E-16  | 67                  |
| BMI       | rs10954772 | 8:30863938  | T  | 0.0155 | 0.0021 | 0.31 | 5.3E-14  | 83                  |
| BMI       | rs10984756 | 9:122651784 | G  | 0.0176 | 0.0028 | 0.09 | 4.4E-10  | 40                  |

|     |             |              |   |        |        |      |         |     |
|-----|-------------|--------------|---|--------|--------|------|---------|-----|
| BMI | rs11047132  | 12:24008435  | G | 0.0227 | 0.0031 | 0.11 | 1.6E-13 | 84  |
| BMI | rs1106761   | 8:142619234  | A | 0.0134 | 0.0020 | 0.35 | 1.8E-11 | 66  |
| BMI | rs1106908   | 17:34942595  | G | 0.0161 | 0.0016 | 0.59 | 7.6E-23 | 101 |
| BMI | rs11075489  | 16:62803841  | C | 0.0116 | 0.0017 | 0.54 | 1.2E-11 | 54  |
| BMI | rs11105839  | 12:91237920  | T | 0.0113 | 0.0017 | 0.63 | 1.3E-11 | 48  |
| BMI | rs11115176  | 12:82465797  | T | 0.0131 | 0.0019 | 0.78 | 6.8E-12 | 48  |
| BMI | rs11121210  | 1:8708529    | C | 0.0111 | 0.0017 | 0.66 | 2.4E-10 | 45  |
| BMI | rs11170468  | 12:39430048  | A | 0.0130 | 0.0019 | 0.81 | 1.1E-11 | 42  |
| BMI | rs11218510  | 11:121922587 | G | 0.0140 | 0.0020 | 0.63 | 6.8E-13 | 73  |
| BMI | rs112566467 | 1:39562627   | T | 0.0184 | 0.0024 | 0.20 | 5.9E-15 | 86  |
| BMI | rs11525873  | 7:138817193  | T | 0.0232 | 0.0032 | 0.86 | 3.0E-13 | 102 |
| BMI | rs11577094  | 1:38026600   | T | 0.0186 | 0.0030 | 0.08 | 3.3E-10 | 43  |
| BMI | rs11611246  | 12:939480    | T | 0.0223 | 0.0020 | 0.22 | 2.0E-28 | 136 |
| BMI | rs11633626  | 15:95271378  | C | 0.0157 | 0.0018 | 0.42 | 7.3E-19 | 97  |
| BMI | rs11636611  | 15:36391965  | T | 0.0104 | 0.0017 | 0.49 | 8.9E-10 | 44  |
| BMI | rs11655587  | 17:47140794  | C | 0.0210 | 0.0020 | 0.66 | 6.9E-26 | 160 |
| BMI | rs11672660  | 19:46180184  | C | 0.0338 | 0.0021 | 0.76 | 6.8E-60 | 335 |
| BMI | rs1167821   | 7:75150312   | T | 0.0201 | 0.0019 | 0.42 | 9.4E-26 | 158 |
| BMI | rs11692326  | 2:208263279  | T | 0.0147 | 0.0019 | 0.22 | 1.7E-14 | 59  |
| BMI | rs11739877  | 5:105876806  | T | 0.0116 | 0.0018 | 0.56 | 4.0E-11 | 53  |
| BMI | rs11757278  | 6:13180454   | T | 0.0133 | 0.0019 | 0.64 | 6.9E-13 | 66  |
| BMI | rs11836108  | 12:133391022 | A | 0.0113 | 0.0018 | 0.26 | 8.4E-10 | 40  |
| BMI | rs11856579  | 15:78012688  | G | 0.0161 | 0.0019 | 0.78 | 1.4E-16 | 72  |
| BMI | rs11866815  | 16:387867    | C | 0.0153 | 0.0019 | 0.78 | 2.2E-16 | 66  |
| BMI | rs11915371  | 3:70539559   | C | 0.0154 | 0.0021 | 0.20 | 2.3E-13 | 60  |
| BMI | rs12049202  | 1:77967523   | T | 0.0239 | 0.0021 | 0.26 | 3.4E-29 | 175 |
| BMI | rs12072739  | 1:98315893   | G | 0.0169 | 0.0023 | 0.29 | 1.5E-13 | 94  |
| BMI | rs12098284  | 10:76047464  | T | 0.0184 | 0.0026 | 0.10 | 9.9E-13 | 49  |

|     |            |              |   |        |        |      |         |     |
|-----|------------|--------------|---|--------|--------|------|---------|-----|
| BMI | rs12121950 | 1:49710264   | T | 0.0185 | 0.0018 | 0.38 | 7.1E-24 | 130 |
| BMI | rs12140153 | 1:62579891   | G | 0.0353 | 0.0034 | 0.92 | 1.4E-25 | 142 |
| BMI | rs12151152 | 19:47563532  | G | 0.0210 | 0.0020 | 0.56 | 6.5E-27 | 175 |
| BMI | rs12206094 | 6:108906200  | C | 0.0143 | 0.0018 | 0.73 | 1.9E-15 | 64  |
| BMI | rs12282785 | 11:76476030  | C | 0.0157 | 0.0023 | 0.79 | 1.4E-11 | 67  |
| BMI | rs12286929 | 11:115022404 | G | 0.0177 | 0.0016 | 0.52 | 1.9E-27 | 126 |
| BMI | rs12321904 | 12:109989228 | T | 0.0096 | 0.0016 | 0.47 | 2.7E-09 | 37  |
| BMI | rs12364470 | 11:134601012 | G | 0.0187 | 0.0022 | 0.21 | 2.2E-17 | 92  |
| BMI | rs12369179 | 12:122963550 | C | 0.0340 | 0.0031 | 0.92 | 2.3E-28 | 138 |
| BMI | rs12422552 | 12:14413931  | G | 0.0131 | 0.0019 | 0.76 | 1.8E-11 | 50  |
| BMI | rs12429545 | 13:54102206  | A | 0.0313 | 0.0024 | 0.14 | 1.4E-37 | 193 |
| BMI | rs12438629 | 15:62122539  | C | 0.0347 | 0.0052 | 0.95 | 2.1E-11 | 93  |
| BMI | rs12449219 | 16:77261943  | G | 0.0164 | 0.0026 | 0.09 | 1.4E-10 | 36  |
| BMI | rs12462975 | 19:30272202  | A | 0.0193 | 0.0018 | 0.31 | 1.5E-25 | 130 |
| BMI | rs12509234 | 4:120319434  | C | 0.0116 | 0.0019 | 0.25 | 3.9E-10 | 40  |
| BMI | rs12628051 | 22:40654276  | T | 0.0161 | 0.0018 | 0.62 | 2.9E-19 | 98  |
| BMI | rs12628891 | 22:38317137  | C | 0.0115 | 0.0019 | 0.72 | 5.9E-10 | 43  |
| BMI | rs12635553 | 3:171113714  | A | 0.0099 | 0.0017 | 0.51 | 4.1E-09 | 40  |
| BMI | rs12680842 | 8:95582606   | A | 0.0142 | 0.0017 | 0.61 | 3.4E-16 | 77  |
| BMI | rs12681792 | 8:62054463   | A | 0.0150 | 0.0021 | 0.29 | 2.9E-12 | 74  |
| BMI | rs1269175  | 6:126040435  | A | 0.0105 | 0.0017 | 0.52 | 8.1E-10 | 44  |
| BMI | rs12692596 | 2:161265910  | T | 0.0120 | 0.0017 | 0.35 | 1.0E-12 | 53  |
| BMI | rs12714199 | 2:86812549   | C | 0.0141 | 0.0017 | 0.40 | 3.2E-16 | 77  |
| BMI | rs12765914 | 10:34013507  | T | 0.0226 | 0.0031 | 0.11 | 2.0E-13 | 78  |
| BMI | rs1277733  | 10:18562538  | T | 0.0120 | 0.0020 | 0.78 | 4.3E-09 | 40  |
| BMI | rs12868881 | 13:112218924 | A | 0.0138 | 0.0017 | 0.45 | 1.4E-15 | 76  |
| BMI | rs12922346 | 16:82438337  | C | 0.0133 | 0.0020 | 0.23 | 1.5E-11 | 50  |
| BMI | rs12939549 | 17:78611724  | A | 0.0180 | 0.0016 | 0.62 | 3.7E-28 | 123 |



|     |             |              |   |        |        |      |          |     |
|-----|-------------|--------------|---|--------|--------|------|----------|-----|
| BMI | rs13002946  | 2:100801959  | T | 0.0177 | 0.0019 | 0.77 | 3.9E-20  | 89  |
| BMI | rs13021737  | 2:632348     | G | 0.0578 | 0.0021 | 0.82 | 2.9E-161 | 785 |
| BMI | rs13033310  | 2:133523605  | A | 0.0146 | 0.0022 | 0.25 | 3.4E-11  | 64  |
| BMI | rs13107325  | 4:103188709  | T | 0.0468 | 0.0032 | 0.05 | 3.8E-47  | 155 |
| BMI | rs13110266  | 4:162129844  | G | 0.0124 | 0.0016 | 0.58 | 4.0E-14  | 60  |
| BMI | rs13174863  | 5:139080745  | G | 0.0197 | 0.0023 | 0.15 | 1.9E-17  | 78  |
| BMI | rs13191362  | 6:163033350  | A | 0.0235 | 0.0025 | 0.91 | 4.1E-21  | 71  |
| BMI | rs1320251   | 17:21264396  | C | 0.0177 | 0.0017 | 0.51 | 5.5E-25  | 126 |
| BMI | rs1346841   | 4:65651730   | G | 0.0126 | 0.0017 | 0.63 | 3.2E-13  | 60  |
| BMI | rs1356506   | 18:40708038  | T | 0.0137 | 0.0018 | 0.59 | 8.4E-15  | 73  |
| BMI | rs1383592   | 8:106430676  | A | 0.0122 | 0.0021 | 0.26 | 4.9E-09  | 46  |
| BMI | rs140733155 | 21:48048773  | G | 0.0559 | 0.0094 | 0.02 | 3.0E-09  | 110 |
| BMI | rs1409818   | 20:21381121  | T | 0.0195 | 0.0028 | 0.09 | 2.6E-12  | 51  |
| BMI | rs1431659   | 8:73439070   | A | 0.0191 | 0.0019 | 0.27 | 2.3E-23  | 115 |
| BMI | rs1436344   | 3:104606144  | C | 0.0147 | 0.0017 | 0.61 | 1.1E-17  | 83  |
| BMI | rs1437842   | 4:173597016  | G | 0.0106 | 0.0017 | 0.58 | 8.5E-10  | 44  |
| BMI | rs1451077   | 2:147901207  | G | 0.0169 | 0.0019 | 0.45 | 1.4E-18  | 114 |
| BMI | rs1451109   | 4:137071335  | G | 0.0158 | 0.0017 | 0.34 | 1.4E-19  | 90  |
| BMI | rs1470545   | 2:205365851  | T | 0.0370 | 0.0043 | 0.04 | 5.6E-18  | 87  |
| BMI | rs1471212   | 15:31857494  | A | 0.0109 | 0.0017 | 0.46 | 1.5E-10  | 48  |
| BMI | rs1481012   | 4:89039082   | A | 0.0188 | 0.0026 | 0.91 | 5.1E-13  | 48  |
| BMI | rs1491905   | 14:47296286  | T | 0.0147 | 0.0017 | 0.46 | 3.9E-18  | 87  |
| BMI | rs1501673   | 5:87963600   | A | 0.0289 | 0.0025 | 0.13 | 2.7E-31  | 154 |
| BMI | rs1522569   | 4:171632637  | T | 0.0141 | 0.0022 | 0.86 | 1.6E-10  | 38  |
| BMI | rs1536053   | 13:111982291 | C | 0.0122 | 0.0019 | 0.71 | 8.0E-11  | 50  |
| BMI | rs1561554   | 2:35409697   | G | 0.0115 | 0.0017 | 0.35 | 4.9E-11  | 48  |
| BMI | rs1658820   | 8:4288577    | T | 0.0132 | 0.0020 | 0.27 | 3.8E-11  | 55  |
| BMI | rs16851483  | 3:141275436  | T | 0.0352 | 0.0034 | 0.07 | 4.9E-25  | 125 |

|     |            |              |   |        |        |      |         |     |
|-----|------------|--------------|---|--------|--------|------|---------|-----|
| BMI | rs16989232 | 20:39291784  | A | 0.0115 | 0.0017 | 0.37 | 6.2E-12 | 50  |
| BMI | rs17001561 | 4:77096118   | A | 0.0145 | 0.0023 | 0.13 | 1.8E-10 | 37  |
| BMI | rs17024393 | 1:110154688  | C | 0.0644 | 0.0049 | 0.05 | 7.1E-39 | 314 |
| BMI | rs17201143 | 20:50402079  | C | 0.0112 | 0.0018 | 0.70 | 1.1E-09 | 43  |
| BMI | rs17276464 | 4:153028860  | T | 0.0096 | 0.0016 | 0.40 | 4.8E-09 | 36  |
| BMI | rs1730859  | 1:107617707  | G | 0.0120 | 0.0017 | 0.31 | 3.0E-12 | 50  |
| BMI | rs17405819 | 8:76806584   | T | 0.0211 | 0.0018 | 0.71 | 6.0E-33 | 149 |
| BMI | rs17636031 | 10:126594078 | C | 0.0154 | 0.0018 | 0.23 | 3.9E-17 | 68  |
| BMI | rs17681451 | 3:114399296  | G | 0.0225 | 0.0031 | 0.93 | 7.4E-13 | 52  |
| BMI | rs17806224 | 20:51065854  | G | 0.0260 | 0.0022 | 0.84 | 7.9E-32 | 147 |
| BMI | rs1852006  | 7:77829768   | G | 0.0153 | 0.0018 | 0.63 | 6.7E-18 | 88  |
| BMI | rs1884389  | 20:1410582   | C | 0.0108 | 0.0017 | 0.56 | 3.7E-10 | 46  |
| BMI | rs1884429  | 1:11112836   | T | 0.0134 | 0.0019 | 0.23 | 2.3E-12 | 52  |
| BMI | rs1884897  | 20:6612832   | G | 0.0184 | 0.0017 | 0.65 | 2.7E-28 | 124 |
| BMI | rs1899689  | 7:121964349  | T | 0.0120 | 0.0017 | 0.40 | 4.2E-13 | 56  |
| BMI | rs1916801  | 3:61187046   | A | 0.0169 | 0.0017 | 0.57 | 1.9E-24 | 113 |
| BMI | rs1927790  | 13:96922191  | C | 0.0140 | 0.0016 | 0.46 | 1.6E-17 | 79  |
| BMI | rs1928295  | 9:120378483  | T | 0.0134 | 0.0016 | 0.52 | 2.2E-16 | 72  |
| BMI | rs194809   | 16:23804956  | A | 0.0126 | 0.0022 | 0.18 | 4.9E-09 | 38  |
| BMI | rs1951455  | 14:91512339  | C | 0.0148 | 0.0019 | 0.72 | 6.1E-15 | 71  |
| BMI | rs1954494  | 14:62593297  | T | 0.0097 | 0.0016 | 0.54 | 2.4E-09 | 38  |
| BMI | rs1982350  | 11:13350131  | G | 0.0156 | 0.0018 | 0.56 | 2.0E-18 | 97  |
| BMI | rs1982441  | 8:28021769   | T | 0.0170 | 0.0025 | 0.17 | 2.2E-11 | 65  |
| BMI | rs1996120  | 15:68181534  | G | 0.0167 | 0.0016 | 0.64 | 3.9E-24 | 103 |
| BMI | rs2051559  | 4:3298800    | C | 0.0167 | 0.0025 | 0.12 | 3.8E-11 | 48  |
| BMI | rs2053682  | 5:170599327  | A | 0.0170 | 0.0018 | 0.66 | 2.6E-20 | 104 |
| BMI | rs2065418  | 11:30422068  | T | 0.0139 | 0.0018 | 0.68 | 6.1E-15 | 68  |
| BMI | rs2112347  | 5:75015242   | T | 0.0276 | 0.0017 | 0.59 | 1.2E-61 | 297 |

|     |           |             |   |        |        |      |         |     |
|-----|-----------|-------------|---|--------|--------|------|---------|-----|
| BMI | rs2134858 | 9:73837155  | C | 0.0117 | 0.0017 | 0.50 | 5.9E-12 | 55  |
| BMI | rs215614  | 7:32347335  | G | 0.0144 | 0.0018 | 0.33 | 2.8E-16 | 74  |
| BMI | rs217669  | 14:62360075 | C | 0.0172 | 0.0021 | 0.25 | 6.3E-16 | 89  |
| BMI | rs2183824 | 9:28412078  | T | 0.0234 | 0.0017 | 0.35 | 2.3E-41 | 201 |
| BMI | rs2192158 | 4:55505360  | A | 0.0137 | 0.0017 | 0.48 | 7.4E-16 | 76  |
| BMI | rs2196618 | 8:85089437  | G | 0.0137 | 0.0019 | 0.72 | 1.5E-12 | 60  |
| BMI | rs2206277 | 6:50798526  | T | 0.0408 | 0.0021 | 0.21 | 1.8E-83 | 441 |
| BMI | rs2228213 | 6:12124855  | G | 0.0144 | 0.0017 | 0.66 | 5.5E-17 | 75  |
| BMI | rs2246012 | 6:131898208 | C | 0.0161 | 0.0022 | 0.22 | 1.1E-13 | 71  |
| BMI | rs2342892 | 16:24540806 | T | 0.0126 | 0.0017 | 0.47 | 1.3E-13 | 64  |
| BMI | rs2357760 | 6:120213880 | A | 0.0143 | 0.0017 | 0.66 | 2.1E-16 | 74  |
| BMI | rs2391540 | 4:130726833 | T | 0.0139 | 0.0018 | 0.31 | 1.4E-14 | 67  |
| BMI | rs2396625 | 7:113028634 | T | 0.0176 | 0.0017 | 0.61 | 2.8E-24 | 119 |
| BMI | rs2400414 | 1:194965200 | C | 0.0126 | 0.0018 | 0.66 | 5.5E-13 | 57  |
| BMI | rs2439823 | 10:99778226 | G | 0.0165 | 0.0017 | 0.50 | 6.5E-22 | 110 |
| BMI | rs2601777 | 16:4035068  | G | 0.0143 | 0.0017 | 0.64 | 2.8E-17 | 76  |
| BMI | rs2605603 | 11:93221105 | G | 0.0103 | 0.0016 | 0.48 | 2.0E-10 | 43  |
| BMI | rs2619976 | 17:71754545 | T | 0.0105 | 0.0018 | 0.38 | 2.0E-09 | 42  |
| BMI | rs2622274 | 6:64240516  | G | 0.0107 | 0.0017 | 0.59 | 3.2E-10 | 45  |
| BMI | rs264962  | 2:104308545 | C | 0.0119 | 0.0017 | 0.55 | 1.7E-12 | 57  |
| BMI | rs2715423 | 15:99511873 | G | 0.0115 | 0.0019 | 0.72 | 1.9E-09 | 43  |
| BMI | rs273505  | 19:18217147 | C | 0.0173 | 0.0019 | 0.46 | 3.3E-19 | 120 |
| BMI | rs2777768 | 9:84186734  | A | 0.0119 | 0.0019 | 0.78 | 6.4E-10 | 39  |
| BMI | rs2820295 | 1:201800868 | A | 0.0235 | 0.0018 | 0.30 | 5.6E-39 | 188 |
| BMI | rs2832283 | 21:30690558 | A | 0.0115 | 0.0020 | 0.24 | 4.7E-09 | 39  |
| BMI | rs28350   | 3:42418446  | A | 0.0172 | 0.0022 | 0.19 | 1.1E-14 | 74  |
| BMI | rs2861089 | 5:164557954 | A | 0.0105 | 0.0017 | 0.36 | 1.6E-09 | 41  |
| BMI | rs2861685 | 2:67837553  | T | 0.0165 | 0.0019 | 0.59 | 7.8E-18 | 107 |

|     |            |              |   |        |        |      |         |     |
|-----|------------|--------------|---|--------|--------|------|---------|-----|
| BMI | rs2862996  | 11:43653833  | G | 0.0216 | 0.0017 | 0.31 | 3.6E-35 | 161 |
| BMI | rs288230   | 5:107422067  | T | 0.0238 | 0.0023 | 0.83 | 4.7E-26 | 131 |
| BMI | rs2907948  | 7:150638484  | G | 0.0145 | 0.0019 | 0.81 | 1.9E-14 | 52  |
| BMI | rs2968487  | 1:96887370   | T | 0.0176 | 0.0018 | 0.26 | 7.6E-22 | 95  |
| BMI | rs3101336  | 1:72751185   | C | 0.0254 | 0.0016 | 0.63 | 4.8E-54 | 242 |
| BMI | rs34277166 | 10:102634853 | A | 0.0144 | 0.0019 | 0.43 | 8.3E-14 | 82  |
| BMI | rs34811474 | 4:25408838   | G | 0.0293 | 0.0023 | 0.78 | 8.5E-38 | 237 |
| BMI | rs349088   | 11:84814393  | C | 0.0130 | 0.0017 | 0.44 | 3.5E-14 | 67  |
| BMI | rs354508   | 8:15535226   | C | 0.0146 | 0.0023 | 0.84 | 2.7E-10 | 46  |
| BMI | rs355777   | 3:154034950  | C | 0.0151 | 0.0017 | 0.42 | 2.1E-18 | 90  |
| BMI | rs35851183 | 4:80717182   | G | 0.0121 | 0.0020 | 0.32 | 1.1E-09 | 51  |
| BMI | rs36061954 | 8:38329650   | T | 0.0119 | 0.0019 | 0.39 | 1.1E-09 | 55  |
| BMI | rs3739514  | 9:133783025  | A | 0.0132 | 0.0020 | 0.39 | 6.6E-11 | 67  |
| BMI | rs3744017  | 17:73871467  | A | 0.0139 | 0.0022 | 0.16 | 2.4E-10 | 41  |
| BMI | rs3770799  | 2:36788616   | G | 0.0114 | 0.0018 | 0.37 | 1.2E-10 | 49  |
| BMI | rs3806114  | 6:20482335   | G | 0.0120 | 0.0018 | 0.27 | 1.5E-11 | 46  |
| BMI | rs3808477  | 8:116670347  | C | 0.0182 | 0.0019 | 0.71 | 8.7E-22 | 110 |
| BMI | rs3811125  | 9:94187247   | C | 0.0152 | 0.0021 | 0.77 | 9.4E-13 | 67  |
| BMI | rs3825061  | 11:118944675 | T | 0.0140 | 0.0017 | 0.32 | 6.2E-16 | 69  |
| BMI | rs3923783  | 17:1843189   | C | 0.0222 | 0.0022 | 0.79 | 4.1E-23 | 131 |
| BMI | rs3930349  | 17:31475545  | C | 0.0140 | 0.0020 | 0.75 | 7.7E-12 | 59  |
| BMI | rs39654    | 3:173095123  | G | 0.0163 | 0.0017 | 0.58 | 1.8E-21 | 104 |
| BMI | rs4097319  | 10:33860515  | T | 0.0107 | 0.0017 | 0.57 | 4.3E-10 | 45  |
| BMI | rs4123853  | 8:14091025   | T | 0.0140 | 0.0017 | 0.32 | 1.1E-15 | 69  |
| BMI | rs41284828 | 13:50963685  | G | 0.0341 | 0.0057 | 0.95 | 3.0E-09 | 97  |
| BMI | rs4256980  | 11:8673939   | G | 0.0187 | 0.0017 | 0.63 | 8.6E-29 | 131 |
| BMI | rs427943   | 21:46570896  | C | 0.0177 | 0.0017 | 0.57 | 3.6E-25 | 124 |
| BMI | rs4290163  | 10:104610926 | T | 0.0130 | 0.0017 | 0.40 | 3.5E-15 | 66  |

|     |            |              |   |        |        |      |          |     |
|-----|------------|--------------|---|--------|--------|------|----------|-----|
| BMI | rs4307239  | 7:24354300   | G | 0.0115 | 0.0017 | 0.47 | 1.5E-11  | 53  |
| BMI | rs4421883  | 13:79561962  | C | 0.0103 | 0.0017 | 0.56 | 1.8E-09  | 42  |
| BMI | rs459552   | 5:112176756  | T | 0.0133 | 0.0019 | 0.28 | 8.4E-12  | 57  |
| BMI | rs4609871  | 16:29932064  | T | 0.0219 | 0.0017 | 0.50 | 6.6E-38  | 194 |
| BMI | rs4671328  | 2:58935282   | T | 0.0214 | 0.0017 | 0.45 | 3.4E-36  | 183 |
| BMI | rs4700608  | 5:63026280   | C | 0.0155 | 0.0017 | 0.55 | 4.3E-20  | 96  |
| BMI | rs4721089  | 7:1872921    | T | 0.0167 | 0.0023 | 0.73 | 5.6E-13  | 89  |
| BMI | rs4740619  | 9:15634326   | T | 0.0189 | 0.0016 | 0.51 | 3.2E-31  | 144 |
| BMI | rs4834272  | 4:113313986  | C | 0.0108 | 0.0017 | 0.35 | 3.5E-10  | 43  |
| BMI | rs4841504  | 8:11024663   | C | 0.0166 | 0.0016 | 0.56 | 5.4E-24  | 110 |
| BMI | rs4857968  | 3:20714580   | G | 0.0125 | 0.0018 | 0.76 | 6.5E-12  | 47  |
| BMI | rs487152   | 6:160774486  | A | 0.0108 | 0.0016 | 0.48 | 3.0E-11  | 47  |
| BMI | rs4880341  | 10:133992689 | C | 0.0130 | 0.0017 | 0.47 | 3.1E-14  | 68  |
| BMI | rs4906263  | 14:103249127 | G | 0.0176 | 0.0018 | 0.35 | 8.1E-23  | 113 |
| BMI | rs4973618  | 2:229002620  | G | 0.0148 | 0.0018 | 0.33 | 1.3E-16  | 78  |
| BMI | rs5215     | 11:17408630  | T | 0.0113 | 0.0017 | 0.56 | 1.2E-11  | 51  |
| BMI | rs543874   | 1:177889480  | G | 0.0479 | 0.0020 | 0.18 | 3.1E-125 | 555 |
| BMI | rs561136   | 1:23345051   | C | 0.0186 | 0.0024 | 0.15 | 1.4E-14  | 70  |
| BMI | rs56356382 | 19:4064057   | T | 0.0217 | 0.0024 | 0.84 | 3.2E-19  | 104 |
| BMI | rs57800857 | 4:140863365  | A | 0.0157 | 0.0020 | 0.66 | 3.5E-15  | 90  |
| BMI | rs592483   | 11:69445173  | C | 0.0137 | 0.0017 | 0.51 | 1.5E-16  | 76  |
| BMI | rs59302296 | 3:9507314    | A | 0.0217 | 0.0032 | 0.08 | 9.1E-12  | 54  |
| BMI | rs594821   | 18:76745589  | C | 0.0191 | 0.0030 | 0.91 | 3.2E-10  | 47  |
| BMI | rs615568   | 20:3008775   | G | 0.0101 | 0.0017 | 0.47 | 3.8E-09  | 41  |
| BMI | rs61813324 | 1:156049877  | T | 0.0289 | 0.0028 | 0.15 | 3.2E-24  | 172 |
| BMI | rs61828641 | 1:174321997  | A | 0.0223 | 0.0030 | 0.10 | 2.5E-13  | 75  |
| BMI | rs6265     | 11:27679916  | C | 0.0413 | 0.0021 | 0.83 | 7.4E-89  | 397 |
| BMI | rs6443750  | 3:181329682  | C | 0.0152 | 0.0021 | 0.80 | 7.3E-13  | 59  |

|     |           |              |   |        |        |      |          |     |
|-----|-----------|--------------|---|--------|--------|------|----------|-----|
| BMI | rs6451675 | 5:43110855   | G | 0.0140 | 0.0018 | 0.60 | 2.5E-14  | 76  |
| BMI | rs6463489 | 7:5542513    | T | 0.0167 | 0.0026 | 0.10 | 2.5E-10  | 39  |
| BMI | rs6476617 | 9:37200103   | G | 0.0149 | 0.0017 | 0.68 | 1.5E-17  | 78  |
| BMI | rs6477694 | 9:111932342  | C | 0.0126 | 0.0017 | 0.40 | 6.6E-14  | 62  |
| BMI | rs6493498 | 15:51754451  | T | 0.0137 | 0.0016 | 0.43 | 4.8E-17  | 74  |
| BMI | rs650198  | 12:69674595  | C | 0.0137 | 0.0019 | 0.33 | 6.4E-13  | 67  |
| BMI | rs6512302 | 20:62691550  | C | 0.0134 | 0.0020 | 0.77 | 1.5E-11  | 52  |
| BMI | rs6539064 | 12:103706754 | C | 0.0194 | 0.0019 | 0.70 | 1.1E-23  | 127 |
| BMI | rs6545714 | 2:59307725   | G | 0.0194 | 0.0016 | 0.40 | 4.0E-32  | 145 |
| BMI | rs6556301 | 5:176527577  | G | 0.0113 | 0.0017 | 0.63 | 8.1E-11  | 48  |
| BMI | rs6567160 | 18:57829135  | C | 0.0552 | 0.0019 | 0.22 | 7.8E-184 | 835 |
| BMI | rs6591407 | 11:56914157  | C | 0.0124 | 0.0021 | 0.84 | 3.6E-09  | 33  |
| BMI | rs6607337 | 17:35057373  | C | 0.0124 | 0.0019 | 0.73 | 2.5E-11  | 49  |
| BMI | rs6661316 | 1:210095527  | T | 0.0120 | 0.0016 | 0.52 | 1.7E-13  | 58  |
| BMI | rs6690398 | 1:66447394   | A | 0.0125 | 0.0017 | 0.58 | 1.9E-13  | 61  |
| BMI | rs6720868 | 2:230663576  | T | 0.0154 | 0.0018 | 0.31 | 1.8E-17  | 82  |
| BMI | rs6804181 | 3:116937546  | A | 0.0141 | 0.0023 | 0.79 | 6.5E-10  | 54  |
| BMI | rs6804842 | 3:25106437   | G | 0.0141 | 0.0016 | 0.54 | 7.6E-18  | 80  |
| BMI | rs6850421 | 4:180187034  | A | 0.0113 | 0.0019 | 0.51 | 3.7E-09  | 51  |
| BMI | rs6864049 | 5:124330522  | G | 0.0121 | 0.0016 | 0.57 | 1.5E-13  | 58  |
| BMI | rs6890310 | 5:27193573   | G | 0.0119 | 0.0019 | 0.75 | 3.3E-10  | 43  |
| BMI | rs6922607 | 6:142703483  | G | 0.0130 | 0.0022 | 0.18 | 1.9E-09  | 41  |
| BMI | rs6932930 | 6:34677103   | G | 0.0257 | 0.0019 | 0.25 | 1.2E-40  | 202 |
| BMI | rs6962280 | 7:44788657   | G | 0.0140 | 0.0019 | 0.47 | 3.4E-13  | 79  |
| BMI | rs698147  | 5:3513485    | A | 0.0116 | 0.0017 | 0.48 | 9.7E-12  | 54  |
| BMI | rs7024334 | 9:109072075  | T | 0.0135 | 0.0020 | 0.22 | 4.7E-12  | 51  |
| BMI | rs7037266 | 9:6942940    | C | 0.0106 | 0.0018 | 0.60 | 1.2E-09  | 43  |
| BMI | rs704061  | 12:89771903  | C | 0.0142 | 0.0017 | 0.41 | 8.3E-17  | 79  |

|     |            |              |   |        |        |      |         |     |
|-----|------------|--------------|---|--------|--------|------|---------|-----|
| BMI | rs7070670  | 10:61842645  | C | 0.0126 | 0.0021 | 0.71 | 7.1E-10 | 52  |
| BMI | rs7084454  | 10:21821274  | A | 0.0198 | 0.0018 | 0.30 | 4.5E-27 | 134 |
| BMI | rs709400   | 14:104149475 | A | 0.0148 | 0.0017 | 0.68 | 5.7E-19 | 77  |
| BMI | rs7124681  | 11:47529947  | A | 0.0257 | 0.0016 | 0.39 | 4.0E-55 | 254 |
| BMI | rs7138803  | 12:50247468  | A | 0.0297 | 0.0017 | 0.38 | 3.1E-71 | 335 |
| BMI | rs7144011  | 14:79940383  | T | 0.0263 | 0.0020 | 0.23 | 2.4E-40 | 196 |
| BMI | rs7181610  | 15:35826859  | A | 0.0146 | 0.0025 | 0.90 | 4.5E-09 | 30  |
| BMI | rs7206608  | 16:82872628  | G | 0.0130 | 0.0018 | 0.34 | 1.2E-12 | 61  |
| BMI | rs7238896  | 18:1840658   | G | 0.0218 | 0.0028 | 0.16 | 2.5E-15 | 104 |
| BMI | rs7239114  | 18:45921214  | A | 0.0120 | 0.0017 | 0.53 | 6.2E-13 | 58  |
| BMI | rs72673947 | 8:118884379  | G | 0.0223 | 0.0031 | 0.12 | 4.1E-13 | 83  |
| BMI | rs7357754  | 9:92207308   | G | 0.0120 | 0.0017 | 0.50 | 1.8E-12 | 58  |
| BMI | rs740157   | 7:77055885   | A | 0.0118 | 0.0016 | 0.46 | 4.8E-13 | 56  |
| BMI | rs7498665  | 16:28883241  | G | 0.0285 | 0.0017 | 0.35 | 1.1E-66 | 298 |
| BMI | rs7534091  | 1:118864616  | G | 0.0120 | 0.0018 | 0.25 | 6.7E-11 | 44  |
| BMI | rs7561278  | 2:48954905   | T | 0.0169 | 0.0021 | 0.77 | 4.9E-16 | 83  |
| BMI | rs7570446  | 2:193801010  | A | 0.0111 | 0.0019 | 0.55 | 4.7E-09 | 49  |
| BMI | rs7575118  | 2:182653725  | T | 0.0140 | 0.0024 | 0.14 | 3.3E-09 | 37  |
| BMI | rs7588437  | 2:181575281  | G | 0.0165 | 0.0017 | 0.68 | 2.3E-22 | 95  |
| BMI | rs7599312  | 2:213413231  | G | 0.0182 | 0.0018 | 0.72 | 1.5E-23 | 109 |
| BMI | rs7607490  | 2:12851120   | A | 0.0164 | 0.0027 | 0.09 | 1.2E-09 | 34  |
| BMI | rs7616009  | 3:194881756  | G | 0.0157 | 0.0024 | 0.86 | 4.3E-11 | 48  |
| BMI | rs7631156  | 3:131751628  | A | 0.0215 | 0.0018 | 0.29 | 3.3E-32 | 155 |
| BMI | rs765875   | 6:143185683  | C | 0.0132 | 0.0017 | 0.46 | 1.1E-14 | 70  |
| BMI | rs7678054  | 4:95093855   | G | 0.0099 | 0.0017 | 0.57 | 4.6E-09 | 39  |
| BMI | rs76942203 | 11:116973247 | A | 0.0263 | 0.0041 | 0.07 | 9.1E-11 | 75  |
| BMI | rs7713317  | 5:95716722   | G | 0.0166 | 0.0018 | 0.31 | 2.0E-20 | 94  |
| BMI | rs7734385  | 5:158460212  | G | 0.0101 | 0.0016 | 0.52 | 6.1E-10 | 41  |

|     |            |              |   |        |        |      |         |     |
|-----|------------|--------------|---|--------|--------|------|---------|-----|
| BMI | rs77432547 | 13:86494817  | G | 0.0170 | 0.0021 | 0.33 | 1.4E-15 | 103 |
| BMI | rs7769594  | 6:83447813   | T | 0.0164 | 0.0023 | 0.14 | 2.1E-12 | 54  |
| BMI | rs7777084  | 7:93089243   | A | 0.0131 | 0.0017 | 0.42 | 1.6E-14 | 68  |
| BMI | rs7802342  | 7:137435925  | G | 0.0124 | 0.0019 | 0.27 | 6.2E-11 | 49  |
| BMI | rs7826312  | 8:32400115   | C | 0.0109 | 0.0016 | 0.57 | 3.2E-11 | 47  |
| BMI | rs7893571  | 10:16750129  | T | 0.0125 | 0.0018 | 0.69 | 5.8E-12 | 54  |
| BMI | rs7899106  | 10:87410904  | G | 0.0327 | 0.0037 | 0.05 | 1.7E-18 | 74  |
| BMI | rs7903146  | 10:114758349 | C | 0.0178 | 0.0018 | 0.77 | 1.7E-23 | 92  |
| BMI | rs79113395 | 1:1590521    | G | 0.0200 | 0.0022 | 0.77 | 2.0E-20 | 115 |
| BMI | rs7944782  | 11:130795698 | G | 0.0144 | 0.0017 | 0.52 | 3.6E-17 | 83  |
| BMI | rs7975187  | 12:60964108  | G | 0.0137 | 0.0021 | 0.21 | 3.9E-11 | 50  |
| BMI | rs8024806  | 15:53473990  | T | 0.0254 | 0.0035 | 0.94 | 6.7E-13 | 56  |
| BMI | rs8075273  | 17:61728881  | C | 0.0137 | 0.0018 | 0.76 | 4.7E-14 | 55  |
| BMI | rs8122855  | 20:25192049  | A | 0.0137 | 0.0018 | 0.34 | 4.1E-14 | 68  |
| BMI | rs8134638  | 21:40644170  | C | 0.0133 | 0.0020 | 0.47 | 1.6E-11 | 71  |
| BMI | rs816367   | 6:53995542   | G | 0.0107 | 0.0017 | 0.34 | 1.0E-09 | 41  |
| BMI | rs8181823  | 13:65477940  | C | 0.0125 | 0.0020 | 0.73 | 4.4E-10 | 49  |
| BMI | rs845084   | 10:125220036 | A | 0.0136 | 0.0019 | 0.27 | 3.2E-12 | 59  |
| BMI | rs867560   | 9:129465233  | G | 0.0136 | 0.0017 | 0.53 | 1.2E-15 | 74  |
| BMI | rs872281   | 14:40834177  | C | 0.0152 | 0.0023 | 0.78 | 1.6E-11 | 64  |
| BMI | rs889398   | 16:69556715  | C | 0.0195 | 0.0016 | 0.59 | 3.2E-32 | 148 |
| BMI | rs891387   | 18:21103909  | T | 0.0208 | 0.0017 | 0.49 | 9.3E-35 | 175 |
| BMI | rs930295   | 2:50233352   | A | 0.0208 | 0.0023 | 0.15 | 2.0E-19 | 90  |
| BMI | rs9320823  | 6:98429337   | C | 0.0165 | 0.0017 | 0.66 | 2.1E-21 | 99  |
| BMI | rs942066   | 14:94031914  | G | 0.0202 | 0.0020 | 0.61 | 2.4E-24 | 157 |
| BMI | rs946824   | 1:243684019  | T | 0.0197 | 0.0025 | 0.16 | 4.8E-15 | 83  |
| BMI | rs9540493  | 13:66205704  | A | 0.0129 | 0.0017 | 0.50 | 7.8E-15 | 67  |
| BMI | rs9595908  | 13:33184288  | T | 0.0154 | 0.0017 | 0.60 | 3.7E-20 | 92  |



|     |            |              |   |         |        |      |          |      |
|-----|------------|--------------|---|---------|--------|------|----------|------|
| BMI | rs9603697  | 13:40783323  | T | 0.0134  | 0.0018 | 0.38 | 1.7E-13  | 68   |
| BMI | rs9808302  | 2:236854450  | G | 0.0116  | 0.0019 | 0.50 | 9.0E-10  | 54   |
| BMI | rs9816226  | 3:185834499  | T | 0.0315  | 0.0021 | 0.82 | 1.5E-50  | 236  |
| BMI | rs9818122  | 3:85861064   | C | 0.0228  | 0.0020 | 0.18 | 4.0E-30  | 125  |
| BMI | rs9826775  | 3:156295341  | A | 0.0155  | 0.0024 | 0.85 | 6.6E-11  | 51   |
| BMI | rs9862795  | 3:49915506   | T | 0.0264  | 0.0019 | 0.42 | 4.4E-44  | 275  |
| BMI | rs9937053  | 16:53799507  | A | 0.0721  | 0.0016 | 0.42 | 1.0E-200 | 2053 |
| WHR | rs10019888 | 4:26062990   | A | -0.0208 | 0.0023 | 0.85 | 8.0E-20  | 87   |
| WHR | rs10049088 | 3:156797648  | T | -0.0271 | 0.0018 | 0.34 | 1.5E-53  | 267  |
| WHR | rs10132280 | 14:25928179  | A | -0.0116 | 0.0018 | 0.32 | 3.1E-10  | 48   |
| WHR | rs10153926 | 2:43189120   | A | 0.0143  | 0.0024 | 0.24 | 2.0E-09  | 59   |
| WHR | rs10164099 | 18:34690744  | T | -0.0149 | 0.0025 | 0.85 | 1.2E-09  | 45   |
| WHR | rs1017698  | 2:219170525  | A | -0.0113 | 0.0018 | 0.65 | 5.1E-10  | 47   |
| WHR | rs1020731  | 2:161144055  | A | 0.0127  | 0.0019 | 0.73 | 5.8E-11  | 51   |
| WHR | rs1045241  | 5:118729286  | T | -0.0123 | 0.0019 | 0.30 | 8.9E-11  | 51   |
| WHR | rs1045411  | 13:31033232  | T | -0.0155 | 0.0019 | 0.31 | 1.3E-15  | 82   |
| WHR | rs10475249 | 5:4010135    | C | 0.0134  | 0.0020 | 0.50 | 1.3E-11  | 72   |
| WHR | rs10490869 | 3:35635145   | A | -0.0183 | 0.0022 | 0.79 | 9.3E-17  | 90   |
| WHR | rs10499013 | 6:97946396   | A | -0.0125 | 0.0020 | 0.27 | 5.1E-10  | 50   |
| WHR | rs10507223 | 12:108455828 | C | 0.0134  | 0.0022 | 0.79 | 5.1E-10  | 48   |
| WHR | rs10745659 | 12:94092690  | C | -0.0127 | 0.0018 | 0.56 | 1.4E-12  | 64   |
| WHR | rs10761785 | 10:65318766  | T | -0.0147 | 0.0017 | 0.52 | 6.4E-18  | 87   |
| WHR | rs10788569 | 10:89604732  | T | -0.0134 | 0.0019 | 0.74 | 4.0E-12  | 56   |
| WHR | rs10827252 | 10:33672884  | A | -0.0113 | 0.0018 | 0.49 | 2.0E-10  | 52   |
| WHR | rs10842707 | 12:26471364  | T | 0.0266  | 0.0020 | 0.26 | 3.9E-39  | 218  |
| WHR | rs10851523 | 15:53044002  | C | -0.0118 | 0.0020 | 0.31 | 1.8E-09  | 48   |
| WHR | rs10876528 | 12:54421476  | A | 0.0236  | 0.0018 | 0.39 | 8.6E-39  | 215  |
| WHR | rs10896012 | 11:65278461  | T | -0.0180 | 0.0022 | 0.86 | 2.1E-16  | 63   |

|     |             |              |   |         |        |      |         |     |
|-----|-------------|--------------|---|---------|--------|------|---------|-----|
| WHR | rs10919388  | 1:170372503  | A | -0.0266 | 0.0019 | 0.27 | 6.4E-43 | 227 |
| WHR | rs10923724  | 1:119546842  | T | 0.0240  | 0.0017 | 0.62 | 1.8E-45 | 219 |
| WHR | rs10980797  | 9:113912553  | A | -0.0154 | 0.0020 | 0.54 | 3.9E-15 | 95  |
| WHR | rs10991433  | 9:107726918  | T | -0.0254 | 0.0028 | 0.90 | 5.7E-20 | 90  |
| WHR | rs11030108  | 11:27695464  | A | 0.0154  | 0.0018 | 0.33 | 1.2E-17 | 84  |
| WHR | rs11055887  | 12:14417179  | A | -0.0133 | 0.0023 | 0.19 | 4.3E-09 | 44  |
| WHR | rs11176015  | 12:66441684  | T | 0.0151  | 0.0020 | 0.27 | 7.2E-14 | 73  |
| WHR | rs11187537  | 10:95346805  | C | 0.0130  | 0.0020 | 0.27 | 1.7E-10 | 53  |
| WHR | rs11216183  | 11:116781545 | A | 0.0226  | 0.0034 | 0.12 | 2.7E-11 | 89  |
| WHR | rs1122080   | 5:158015903  | A | -0.0131 | 0.0022 | 0.17 | 1.6E-09 | 39  |
| WHR | rs112266013 | 6:15230743   | A | -0.0167 | 0.0028 | 0.12 | 3.2E-09 | 49  |
| WHR | rs11231084  | 11:62177643  | C | -0.0117 | 0.0020 | 0.46 | 2.4E-09 | 55  |
| WHR | rs1124639   | 2:200775744  | T | -0.0113 | 0.0017 | 0.50 | 7.5E-11 | 52  |
| WHR | rs1139653   | 16:4484396   | A | 0.0147  | 0.0020 | 0.30 | 1.1E-13 | 74  |
| WHR | rs1142      | 7:104756326  | T | 0.0149  | 0.0018 | 0.32 | 2.1E-17 | 78  |
| WHR | rs114760566 | 6:34192036   | A | 0.0674  | 0.0048 | 0.03 | 2.9E-44 | 195 |
| WHR | rs1158805   | 18:40736590  | A | -0.0133 | 0.0018 | 0.42 | 4.9E-13 | 70  |
| WHR | rs1163627   | 13:112225701 | A | 0.0104  | 0.0017 | 0.60 | 3.0E-09 | 42  |
| WHR | rs11654387  | 17:68446861  | C | 0.0161  | 0.0018 | 0.56 | 1.5E-19 | 103 |
| WHR | rs11724804  | 4:965779     | A | -0.0165 | 0.0018 | 0.45 | 5.0E-20 | 109 |
| WHR | rs11747001  | 5:132412299  | A | 0.0154  | 0.0020 | 0.74 | 8.4E-15 | 73  |
| WHR | rs11764879  | 7:77333267   | A | -0.0117 | 0.0019 | 0.26 | 3.9E-10 | 43  |
| WHR | rs11878507  | 19:18837823  | A | -0.0119 | 0.0020 | 0.54 | 1.4E-09 | 57  |
| WHR | rs11897119  | 2:66772000   | T | -0.0134 | 0.0017 | 0.58 | 4.1E-15 | 70  |
| WHR | rs1190982   | 14:58815839  | T | 0.0157  | 0.0019 | 0.36 | 5.1E-16 | 91  |
| WHR | rs11992444  | 8:25464690   | T | 0.0185  | 0.0020 | 0.53 | 5.0E-21 | 138 |
| WHR | rs12024554  | 1:19925759   | T | -0.0149 | 0.0023 | 0.23 | 1.1E-10 | 64  |
| WHR | rs12042959  | 1:243533273  | A | 0.0155  | 0.0025 | 0.85 | 9.3E-10 | 50  |

|     |            |              |   |         |        |      |         |     |
|-----|------------|--------------|---|---------|--------|------|---------|-----|
| WHR | rs12101393 | 15:92570921  | C | 0.0140  | 0.0022 | 0.76 | 1.2E-10 | 57  |
| WHR | rs12138803 | 1:172348823  | T | 0.0198  | 0.0019 | 0.24 | 7.2E-25 | 116 |
| WHR | rs12140153 | 1:62579891   | T | -0.0214 | 0.0035 | 0.08 | 7.6E-10 | 52  |
| WHR | rs12206094 | 6:108906200  | T | -0.0119 | 0.0019 | 0.27 | 2.2E-10 | 45  |
| WHR | rs12287076 | 11:47606865  | C | 0.0192  | 0.0020 | 0.73 | 3.5E-21 | 118 |
| WHR | rs12430764 | 13:93896935  | A | 0.0107  | 0.0018 | 0.48 | 1.9E-09 | 46  |
| WHR | rs1243188  | 10:21908803  | T | -0.0148 | 0.0019 | 0.71 | 2.4E-14 | 72  |
| WHR | rs12440605 | 15:42102285  | A | 0.0118  | 0.0018 | 0.52 | 4.0E-11 | 56  |
| WHR | rs12440695 | 15:62435156  | T | -0.0103 | 0.0018 | 0.66 | 4.4E-09 | 38  |
| WHR | rs12449442 | 17:65947640  | A | 0.0172  | 0.0021 | 0.23 | 2.6E-16 | 86  |
| WHR | rs12459350 | 19:2176586   | A | 0.0134  | 0.0017 | 0.53 | 2.2E-15 | 72  |
| WHR | rs12469667 | 2:166162705  | A | -0.0130 | 0.0021 | 0.27 | 2.8E-10 | 53  |
| WHR | rs12494190 | 3:168949384  | A | -0.0121 | 0.0018 | 0.40 | 3.0E-11 | 57  |
| WHR | rs12495178 | 3:85886077   | T | 0.0124  | 0.0018 | 0.59 | 1.3E-12 | 60  |
| WHR | rs12527712 | 6:80916967   | T | 0.0284  | 0.0033 | 0.08 | 3.4E-18 | 93  |
| WHR | rs12575252 | 11:8694073   | C | -0.0154 | 0.0018 | 0.36 | 2.3E-18 | 89  |
| WHR | rs12590238 | 14:103350197 | C | -0.0141 | 0.0023 | 0.79 | 1.5E-09 | 53  |
| WHR | rs12593088 | 15:81058640  | A | -0.0128 | 0.0019 | 0.29 | 5.2E-12 | 54  |
| WHR | rs12608504 | 19:18389135  | A | 0.0251  | 0.0018 | 0.35 | 4.7E-46 | 231 |
| WHR | rs12629247 | 3:187632584  | C | 0.0289  | 0.0047 | 0.05 | 9.8E-10 | 67  |
| WHR | rs12631066 | 3:33872787   | C | 0.0124  | 0.0021 | 0.23 | 2.1E-09 | 44  |
| WHR | rs12684047 | 9:111972671  | A | -0.0185 | 0.0023 | 0.19 | 3.4E-15 | 84  |
| WHR | rs12692387 | 2:9698190    | T | -0.0124 | 0.0021 | 0.43 | 2.9E-09 | 61  |
| WHR | rs12774134 | 10:4963327   | T | -0.0158 | 0.0026 | 0.13 | 2.1E-09 | 45  |
| WHR | rs12777288 | 10:115860058 | T | -0.0139 | 0.0021 | 0.79 | 6.9E-11 | 51  |
| WHR | rs12828016 | 12:998365    | T | -0.0114 | 0.0018 | 0.33 | 4.1E-10 | 47  |
| WHR | rs1294436  | 6:6746166    | C | 0.0230  | 0.0020 | 0.59 | 1.3E-30 | 206 |
| WHR | rs12986231 | 19:18469017  | T | 0.0150  | 0.0022 | 0.74 | 2.0E-11 | 70  |

|     |            |              |   |         |        |      |         |     |
|-----|------------|--------------|---|---------|--------|------|---------|-----|
| WHR | rs13028903 | 2:59951465   | T | 0.0113  | 0.0018 | 0.41 | 2.8E-10 | 50  |
| WHR | rs13063979 | 3:131564741  | T | -0.0135 | 0.0019 | 0.74 | 1.2E-12 | 56  |
| WHR | rs13130484 | 4:45175691   | T | 0.0147  | 0.0017 | 0.45 | 7.8E-18 | 86  |
| WHR | rs13229637 | 7:136717447  | T | 0.0159  | 0.0025 | 0.82 | 1.9E-10 | 61  |
| WHR | rs13255070 | 8:68203608   | A | -0.0136 | 0.0022 | 0.75 | 5.1E-10 | 56  |
| WHR | rs13256367 | 8:128334900  | A | 0.0141  | 0.0019 | 0.68 | 5.4E-14 | 70  |
| WHR | rs1328757  | 20:56135199  | T | 0.0114  | 0.0018 | 0.45 | 1.7E-10 | 52  |
| WHR | rs13333747 | 16:2175373   | T | 0.0180  | 0.0025 | 0.83 | 1.4E-12 | 75  |
| WHR | rs1334576  | 6:7211818    | A | -0.0162 | 0.0018 | 0.47 | 1.7E-19 | 106 |
| WHR | rs1345203  | 2:112253851  | T | 0.0187  | 0.0024 | 0.80 | 3.1E-15 | 90  |
| WHR | rs13642    | 11:30432220  | A | 0.0113  | 0.0019 | 0.68 | 9.5E-10 | 45  |
| WHR | rs1382894  | 5:76599022   | A | 0.0114  | 0.0019 | 0.65 | 9.2E-10 | 48  |
| WHR | rs1385167  | 2:66200648   | A | -0.0224 | 0.0024 | 0.82 | 6.2E-20 | 121 |
| WHR | rs1406948  | 20:33905619  | A | -0.0137 | 0.0017 | 0.43 | 4.1E-15 | 74  |
| WHR | rs1431659  | 8:73439070   | A | 0.0143  | 0.0020 | 0.27 | 1.1E-12 | 65  |
| WHR | rs1452075  | 3:62481063   | T | 0.0123  | 0.0019 | 0.70 | 1.3E-10 | 51  |
| WHR | rs1458156  | 12:41887940  | T | 0.0125  | 0.0018 | 0.48 | 1.9E-12 | 63  |
| WHR | rs1494204  | 10:27904321  | T | -0.0106 | 0.0018 | 0.36 | 4.4E-09 | 42  |
| WHR | rs15285    | 8:19824667   | T | -0.0117 | 0.0019 | 0.27 | 1.6E-09 | 43  |
| WHR | rs1534696  | 7:26397239   | A | -0.0226 | 0.0017 | 0.56 | 3.7E-39 | 203 |
| WHR | rs155524   | 3:37562141   | A | 0.0134  | 0.0018 | 0.58 | 1.3E-13 | 71  |
| WHR | rs1563355  | 1:219653101  | T | -0.0277 | 0.0019 | 0.34 | 1.6E-49 | 276 |
| WHR | rs1569135  | 2:188115398  | A | 0.0215  | 0.0017 | 0.56 | 2.8E-37 | 184 |
| WHR | rs16976932 | 15:56781255  | A | 0.0186  | 0.0027 | 0.08 | 1.0E-11 | 41  |
| WHR | rs17101456 | 10:122875040 | A | -0.0206 | 0.0028 | 0.86 | 7.5E-14 | 82  |
| WHR | rs17109256 | 14:79939993  | A | 0.0169  | 0.0021 | 0.23 | 2.4E-16 | 81  |
| WHR | rs17324331 | 2:230739209  | C | 0.0120  | 0.0019 | 0.31 | 1.8E-10 | 50  |
| WHR | rs17326656 | 2:48962291   | T | 0.0153  | 0.0021 | 0.18 | 4.2E-13 | 56  |

|     |            |              |   |         |        |      |         |     |
|-----|------------|--------------|---|---------|--------|------|---------|-----|
| WHR | rs17448885 | 6:97385975   | C | 0.0110  | 0.0019 | 0.60 | 3.3E-09 | 47  |
| WHR | rs17513613 | 19:30286822  | T | -0.0125 | 0.0018 | 0.67 | 5.4E-12 | 56  |
| WHR | rs1757471  | 10:34168090  | T | 0.0128  | 0.0018 | 0.55 | 5.9E-13 | 65  |
| WHR | rs17644283 | 4:26308792   | A | 0.0148  | 0.0018 | 0.37 | 3.2E-17 | 83  |
| WHR | rs17651507 | 17:44059010  | A | 0.0187  | 0.0020 | 0.73 | 1.9E-20 | 111 |
| WHR | rs17738166 | 5:172997978  | A | 0.0114  | 0.0018 | 0.41 | 3.8E-10 | 51  |
| WHR | rs1787013  | 18:13072979  | T | -0.0108 | 0.0018 | 0.57 | 1.3E-09 | 46  |
| WHR | rs1789882  | 4:100235053  | A | 0.0160  | 0.0023 | 0.20 | 1.0E-11 | 65  |
| WHR | rs1800437  | 19:46181392  | C | -0.0209 | 0.0022 | 0.24 | 6.2E-22 | 128 |
| WHR | rs1800978  | 9:107665978  | C | 0.0201  | 0.0026 | 0.88 | 9.2E-15 | 68  |
| WHR | rs1822489  | 5:112542527  | A | 0.0122  | 0.0019 | 0.40 | 1.5E-10 | 58  |
| WHR | rs1974004  | 9:95568230   | T | 0.0173  | 0.0025 | 0.14 | 3.8E-12 | 57  |
| WHR | rs1997833  | 20:39690342  | T | -0.0122 | 0.0019 | 0.73 | 4.2E-11 | 47  |
| WHR | rs2047937  | 16:49864791  | T | -0.0106 | 0.0017 | 0.45 | 4.6E-10 | 45  |
| WHR | rs2061708  | 1:103417203  | C | 0.0152  | 0.0020 | 0.57 | 2.1E-14 | 92  |
| WHR | rs2112347  | 5:75015242   | T | 0.0150  | 0.0017 | 0.59 | 8.4E-18 | 88  |
| WHR | rs213624   | 1:26201164   | A | 0.0118  | 0.0018 | 0.51 | 3.3E-11 | 56  |
| WHR | rs2161097  | 5:103945178  | T | 0.0126  | 0.0018 | 0.41 | 2.1E-12 | 62  |
| WHR | rs2161228  | 5:88001798   | T | 0.0192  | 0.0029 | 0.11 | 4.3E-11 | 57  |
| WHR | rs2167750  | 4:89730074   | T | 0.0199  | 0.0018 | 0.51 | 6.5E-29 | 160 |
| WHR | rs2183825  | 9:28412375   | T | -0.0141 | 0.0018 | 0.65 | 4.4E-15 | 73  |
| WHR | rs2195086  | 2:60814466   | T | -0.0144 | 0.0024 | 0.84 | 2.8E-09 | 45  |
| WHR | rs2200155  | 12:33734935  | A | -0.0133 | 0.0018 | 0.39 | 5.1E-13 | 68  |
| WHR | rs2236519  | 20:45529571  | A | 0.0212  | 0.0018 | 0.37 | 1.9E-30 | 169 |
| WHR | rs2276390  | 11:111895254 | T | -0.0210 | 0.0019 | 0.40 | 5.8E-28 | 170 |
| WHR | rs2291542  | 3:49751585   | T | 0.0168  | 0.0018 | 0.27 | 1.7E-20 | 90  |
| WHR | rs2294239  | 22:29449477  | A | 0.0200  | 0.0017 | 0.59 | 3.2E-31 | 156 |
| WHR | rs2306589  | 17:34848874  | T | 0.0160  | 0.0017 | 0.46 | 2.5E-21 | 103 |

|     |            |              |   |         |        |      |         |     |
|-----|------------|--------------|---|---------|--------|------|---------|-----|
| WHR | rs2335077  | 1:107573565  | A | -0.0121 | 0.0019 | 0.69 | 8.3E-11 | 51  |
| WHR | rs2398893  | 9:96758342   | A | 0.0157  | 0.0019 | 0.71 | 9.0E-17 | 83  |
| WHR | rs2448     | 5:53302354   | T | 0.0158  | 0.0020 | 0.74 | 4.6E-15 | 78  |
| WHR | rs2455848  | 3:15771372   | T | 0.0128  | 0.0018 | 0.29 | 1.8E-12 | 55  |
| WHR | rs2503099  | 6:100610101  | A | -0.0214 | 0.0023 | 0.85 | 8.3E-20 | 97  |
| WHR | rs2513987  | 11:102977271 | A | -0.0138 | 0.0022 | 0.25 | 3.9E-10 | 57  |
| WHR | rs2526886  | 14:71359064  | T | 0.0125  | 0.0021 | 0.68 | 3.6E-09 | 55  |
| WHR | rs2595004  | 3:11406721   | T | -0.0156 | 0.0023 | 0.86 | 2.1E-11 | 49  |
| WHR | rs2613505  | 1:72835410   | T | 0.0161  | 0.0022 | 0.84 | 1.0E-13 | 56  |
| WHR | rs2715135  | 7:50750128   | T | 0.0109  | 0.0018 | 0.37 | 4.1E-09 | 44  |
| WHR | rs2725371  | 8:30854033   | A | 0.0172  | 0.0021 | 0.29 | 9.9E-16 | 98  |
| WHR | rs2742690  | 1:2987268    | A | 0.0168  | 0.0025 | 0.15 | 9.2E-12 | 58  |
| WHR | rs28446899 | 8:72396213   | T | 0.0362  | 0.0037 | 0.06 | 7.9E-23 | 121 |
| WHR | rs28451064 | 21:35593827  | A | 0.0177  | 0.0030 | 0.14 | 4.2E-09 | 62  |
| WHR | rs2898885  | 14:65421274  | T | -0.0138 | 0.0023 | 0.85 | 8.5E-10 | 40  |
| WHR | rs2903995  | 1:23271504   | A | -0.0122 | 0.0018 | 0.43 | 1.6E-11 | 59  |
| WHR | rs2925979  | 16:81534790  | T | 0.0215  | 0.0018 | 0.32 | 1.6E-31 | 163 |
| WHR | rs2957658  | 11:10393468  | A | -0.0125 | 0.0020 | 0.52 | 1.8E-10 | 63  |
| WHR | rs3092781  | 20:45789953  | T | -0.0145 | 0.0017 | 0.48 | 1.9E-17 | 85  |
| WHR | rs3121419  | 4:3232257    | T | -0.0129 | 0.0019 | 0.37 | 1.6E-11 | 63  |
| WHR | rs313741   | 1:86273451   | A | -0.0120 | 0.0018 | 0.51 | 1.6E-11 | 58  |
| WHR | rs332105   | 2:119444229  | A | -0.0139 | 0.0018 | 0.51 | 1.1E-14 | 78  |
| WHR | rs34322    | 12:12879570  | T | 0.0104  | 0.0018 | 0.42 | 4.6E-09 | 43  |
| WHR | rs35169799 | 11:64031241  | T | 0.0373  | 0.0041 | 0.08 | 6.3E-20 | 170 |
| WHR | rs36061954 | 8:38329650   | T | 0.0146  | 0.0020 | 0.39 | 3.4E-13 | 82  |
| WHR | rs372321   | 7:101721006  | A | 0.0156  | 0.0023 | 0.14 | 1.7E-11 | 48  |
| WHR | rs3736485  | 15:51748610  | A | 0.0118  | 0.0017 | 0.45 | 3.8E-12 | 56  |
| WHR | rs3767848  | 1:214173840  | A | -0.0124 | 0.0021 | 0.29 | 2.2E-09 | 51  |

|     |           |              |   |         |        |      |         |     |
|-----|-----------|--------------|---|---------|--------|------|---------|-----|
| WHR | rs3786897 | 19:33893008  | A | -0.0237 | 0.0017 | 0.59 | 1.5E-43 | 219 |
| WHR | rs3825061 | 11:118944675 | T | 0.0142  | 0.0018 | 0.32 | 5.5E-15 | 71  |
| WHR | rs3891424 | 2:239365456  | A | -0.0278 | 0.0044 | 0.06 | 4.0E-10 | 69  |
| WHR | rs3903399 | 1:205041542  | T | -0.0149 | 0.0022 | 0.77 | 6.8E-12 | 63  |
| WHR | rs39312   | 7:116954785  | A | -0.0154 | 0.0018 | 0.59 | 3.5E-18 | 92  |
| WHR | rs3936510 | 5:55860866   | T | 0.0241  | 0.0021 | 0.16 | 1.8E-29 | 124 |
| WHR | rs399984  | 2:164877930  | C | 0.0129  | 0.0022 | 0.78 | 1.9E-09 | 46  |
| WHR | rs409125  | 2:165667643  | A | -0.0182 | 0.0018 | 0.58 | 2.1E-23 | 130 |
| WHR | rs4239275 | 17:79923718  | T | 0.0118  | 0.0018 | 0.40 | 3.3E-11 | 54  |
| WHR | rs429358  | 19:45411941  | T | 0.0346  | 0.0027 | 0.83 | 4.2E-37 | 269 |
| WHR | rs4372913 | 2:114517748  | A | -0.0140 | 0.0022 | 0.74 | 8.6E-11 | 61  |
| WHR | rs4395620 | 5:106328326  | T | 0.0106  | 0.0018 | 0.51 | 3.6E-09 | 45  |
| WHR | rs4454042 | 5:155824774  | T | 0.0127  | 0.0020 | 0.30 | 1.4E-10 | 55  |
| WHR | rs4476935 | 7:112987650  | T | -0.0108 | 0.0018 | 0.41 | 1.5E-09 | 46  |
| WHR | rs4646342 | 17:17493272  | A | -0.0130 | 0.0018 | 0.38 | 6.6E-13 | 64  |
| WHR | rs4660808 | 1:40018509   | T | 0.0145  | 0.0021 | 0.20 | 7.6E-12 | 54  |
| WHR | rs4671193 | 2:67846288   | T | -0.0191 | 0.0018 | 0.40 | 4.8E-25 | 142 |
| WHR | rs4686340 | 3:9345218    | A | 0.0123  | 0.0020 | 0.26 | 6.0E-10 | 47  |
| WHR | rs4714668 | 6:43101270   | C | -0.0117 | 0.0020 | 0.56 | 2.5E-09 | 54  |
| WHR | rs4727695 | 7:107614003  | A | 0.0215  | 0.0029 | 0.92 | 1.8E-13 | 54  |
| WHR | rs4755720 | 11:43628749  | T | -0.0132 | 0.0018 | 0.62 | 4.0E-13 | 67  |
| WHR | rs4779526 | 15:31705683  | A | 0.0132  | 0.0021 | 0.73 | 2.1E-10 | 55  |
| WHR | rs4788204 | 16:29995218  | A | 0.0169  | 0.0018 | 0.42 | 2.6E-21 | 112 |
| WHR | rs4851284 | 2:100894887  | T | -0.0151 | 0.0021 | 0.72 | 5.6E-13 | 74  |
| WHR | rs4894803 | 3:171800256  | A | 0.0149  | 0.0018 | 0.60 | 3.7E-16 | 86  |
| WHR | rs494752  | 18:46853270  | C | -0.0154 | 0.0019 | 0.62 | 2.3E-16 | 90  |
| WHR | rs4964656 | 12:108594069 | C | -0.0181 | 0.0020 | 0.36 | 2.0E-20 | 121 |
| WHR | rs536665  | 11:85322400  | A | -0.0171 | 0.0024 | 0.86 | 2.2E-12 | 57  |

|     |            |              |   |         |        |      |         |     |
|-----|------------|--------------|---|---------|--------|------|---------|-----|
| WHR | rs543874   | 1:177889480  | A | -0.0203 | 0.0021 | 0.82 | 8.1E-22 | 100 |
| WHR | rs55747707 | 7:73037366   | A | -0.0154 | 0.0023 | 0.18 | 3.4E-11 | 56  |
| WHR | rs55920843 | 2:158412701  | T | 0.0623  | 0.0092 | 0.99 | 1.5E-11 | 50  |
| WHR | rs579682   | 11:122014110 | T | -0.0133 | 0.0020 | 0.74 | 2.0E-11 | 54  |
| WHR | rs591939   | 17:40698075  | A | -0.0177 | 0.0023 | 0.78 | 9.1E-15 | 88  |
| WHR | rs6021889  | 20:50982870  | A | 0.0203  | 0.0019 | 0.74 | 2.5E-27 | 129 |
| WHR | rs605066   | 6:139829666  | T | -0.0192 | 0.0018 | 0.54 | 2.4E-26 | 148 |
| WHR | rs6130360  | 20:42010996  | A | 0.0151  | 0.0025 | 0.86 | 1.1E-09 | 43  |
| WHR | rs62095889 | 18:21069068  | A | -0.0166 | 0.0021 | 0.34 | 1.6E-15 | 100 |
| WHR | rs62506196 | 8:60264465   | A | -0.0159 | 0.0027 | 0.79 | 2.7E-09 | 69  |
| WHR | rs62565259 | 9:102162570  | T | -0.0157 | 0.0027 | 0.13 | 3.7E-09 | 46  |
| WHR | rs645040   | 3:135926622  | T | 0.0156  | 0.0020 | 0.81 | 1.2E-14 | 61  |
| WHR | rs6474945  | 9:15670492   | T | -0.0101 | 0.0017 | 0.49 | 2.7E-09 | 41  |
| WHR | rs6545714  | 2:59307725   | A | -0.0139 | 0.0017 | 0.61 | 9.0E-16 | 75  |
| WHR | rs6548834  | 3:82704753   | A | 0.0118  | 0.0018 | 0.31 | 1.6E-10 | 48  |
| WHR | rs6550597  | 3:18738940   | A | 0.0117  | 0.0020 | 0.67 | 3.1E-09 | 49  |
| WHR | rs6566233  | 18:53445930  | T | -0.0128 | 0.0020 | 0.55 | 7.1E-11 | 66  |
| WHR | rs6567160  | 18:57829135  | T | -0.0263 | 0.0020 | 0.78 | 2.5E-39 | 189 |
| WHR | rs6604731  | 1:224051439  | T | -0.0116 | 0.0019 | 0.30 | 2.5E-09 | 46  |
| WHR | rs664532   | 13:110932363 | T | 0.0113  | 0.0019 | 0.41 | 1.7E-09 | 50  |
| WHR | rs6658723  | 1:112274162  | T | 0.0145  | 0.0020 | 0.47 | 2.3E-13 | 85  |
| WHR | rs6688053  | 1:163589208  | T | 0.0123  | 0.0020 | 0.48 | 4.4E-10 | 61  |
| WHR | rs6688233  | 1:9335745    | T | 0.0186  | 0.0021 | 0.20 | 3.0E-19 | 89  |
| WHR | rs668871   | 6:160769811  | T | -0.0134 | 0.0020 | 0.48 | 7.2E-12 | 72  |
| WHR | rs6694768  | 1:114953420  | T | 0.0121  | 0.0019 | 0.68 | 1.6E-10 | 51  |
| WHR | rs6699397  | 1:91212216   | A | -0.0118 | 0.0017 | 0.51 | 1.3E-11 | 56  |
| WHR | rs672341   | 6:153455994  | A | -0.0122 | 0.0020 | 0.42 | 8.0E-10 | 59  |
| WHR | rs6743060  | 2:629510     | A | 0.0266  | 0.0022 | 0.82 | 1.8E-32 | 167 |



|     |            |              |   |         |        |      |          |      |
|-----|------------|--------------|---|---------|--------|------|----------|------|
| WHR | rs6749646  | 2:25193998   | A | -0.0210 | 0.0022 | 0.84 | 6.0E-22  | 95   |
| WHR | rs6795831  | 3:129341403  | A | 0.0288  | 0.0023 | 0.82 | 2.1E-37  | 197  |
| WHR | rs6905288  | 6:43758873   | A | 0.0327  | 0.0017 | 0.58 | 2.0E-78  | 421  |
| WHR | rs6942652  | 7:120889272  | C | -0.0126 | 0.0018 | 0.41 | 2.2E-12  | 62   |
| WHR | rs7025089  | 9:134881443  | A | -0.0118 | 0.0019 | 0.68 | 4.3E-10  | 49   |
| WHR | rs7070670  | 10:61842645  | T | -0.0132 | 0.0021 | 0.29 | 3.6E-10  | 58   |
| WHR | rs7070749  | 10:63882682  | A | 0.0126  | 0.0020 | 0.55 | 1.9E-10  | 63   |
| WHR | rs708437   | 10:36227656  | A | 0.0144  | 0.0024 | 0.77 | 1.6E-09  | 60   |
| WHR | rs711869   | 2:13073967   | A | -0.0171 | 0.0018 | 0.58 | 2.4E-21  | 115  |
| WHR | rs7138803  | 12:50247468  | A | 0.0125  | 0.0018 | 0.38 | 1.1E-12  | 59   |
| WHR | rs7183908  | 15:74329193  | T | -0.0158 | 0.0020 | 0.46 | 8.3E-16  | 100  |
| WHR | rs7186893  | 16:24806420  | T | -0.0137 | 0.0020 | 0.24 | 1.2E-11  | 55   |
| WHR | rs719802   | 11:113234679 | T | 0.0114  | 0.0018 | 0.37 | 3.8E-10  | 49   |
| WHR | rs7198287  | 16:85258191  | T | -0.0138 | 0.0022 | 0.20 | 6.1E-10  | 49   |
| WHR | rs7206608  | 16:82872628  | C | -0.0127 | 0.0019 | 0.66 | 2.5E-11  | 58   |
| WHR | rs7213608  | 17:21279289  | T | -0.0171 | 0.0019 | 0.65 | 7.0E-19  | 107  |
| WHR | rs7217226  | 17:2136065   | T | -0.0137 | 0.0018 | 0.65 | 9.9E-15  | 69   |
| WHR | rs7222     | 12:2055266   | T | 0.0109  | 0.0018 | 0.50 | 1.2E-09  | 48   |
| WHR | rs72959041 | 6:127454893  | A | 0.1260  | 0.0044 | 0.06 | 4.6E-183 | 1441 |
| WHR | rs7311622  | 12:98772975  | T | -0.0119 | 0.0018 | 0.37 | 3.0E-11  | 53   |
| WHR | rs733381   | 22:40669648  | A | 0.0122  | 0.0021 | 0.75 | 2.8E-09  | 45   |
| WHR | rs7395513  | 11:69262756  | A | -0.0173 | 0.0020 | 0.45 | 2.5E-18  | 119  |
| WHR | rs747249   | 11:130271647 | A | 0.0111  | 0.0019 | 0.35 | 2.7E-09  | 45   |
| WHR | rs747601   | 11:13274553  | A | -0.0128 | 0.0020 | 0.29 | 7.3E-11  | 54   |
| WHR | rs7492628  | 14:91547136  | C | -0.0125 | 0.0019 | 0.71 | 7.9E-11  | 51   |
| WHR | rs7498665  | 16:28883241  | A | -0.0168 | 0.0017 | 0.65 | 1.1E-22  | 104  |
| WHR | rs758598   | 17:59492714  | A | 0.0123  | 0.0019 | 0.31 | 5.6E-11  | 52   |
| WHR | rs7591387  | 2:43756032   | T | 0.0179  | 0.0028 | 0.08 | 9.3E-11  | 38   |

|     |            |              |   |         |        |      |         |     |
|-----|------------|--------------|---|---------|--------|------|---------|-----|
| WHR | rs7599312  | 2:213413231  | A | -0.0114 | 0.0019 | 0.28 | 2.4E-09 | 43  |
| WHR | rs7647305  | 3:185834290  | T | -0.0142 | 0.0021 | 0.21 | 8.3E-12 | 53  |
| WHR | rs76699125 | 3:64701535   | T | 0.0320  | 0.0041 | 0.95 | 5.0E-15 | 79  |
| WHR | rs7744833  | 6:20581828   | A | 0.0125  | 0.0019 | 0.73 | 6.9E-11 | 50  |
| WHR | rs7797307  | 7:68686127   | C | -0.0245 | 0.0040 | 0.04 | 7.1E-10 | 38  |
| WHR | rs780159   | 10:80907147  | A | -0.0133 | 0.0017 | 0.42 | 2.9E-14 | 70  |
| WHR | rs7823561  | 8:25641764   | A | 0.0159  | 0.0019 | 0.64 | 3.3E-17 | 94  |
| WHR | rs789351   | 4:145868370  | T | 0.0123  | 0.0017 | 0.38 | 7.6E-13 | 57  |
| WHR | rs7907173  | 10:5648787   | A | -0.0109 | 0.0018 | 0.46 | 9.4E-10 | 48  |
| WHR | rs793456   | 3:99525631   | A | -0.0106 | 0.0018 | 0.58 | 3.6E-09 | 44  |
| WHR | rs797486   | 13:51221618  | A | 0.0316  | 0.0026 | 0.87 | 1.1E-34 | 179 |
| WHR | rs8024294  | 15:94023132  | A | 0.0177  | 0.0028 | 0.12 | 3.6E-10 | 52  |
| WHR | rs8043060  | 15:67661784  | A | -0.0166 | 0.0020 | 0.25 | 8.9E-17 | 84  |
| WHR | rs8060576  | 16:4908956   | T | 0.0161  | 0.0027 | 0.11 | 1.5E-09 | 41  |
| WHR | rs8070737  | 17:3981066   | T | 0.0160  | 0.0023 | 0.19 | 7.4E-12 | 63  |
| WHR | rs8071778  | 17:46080233  | C | -0.0160 | 0.0025 | 0.15 | 6.6E-11 | 52  |
| WHR | rs8079062  | 17:74255029  | A | -0.0234 | 0.0033 | 0.94 | 1.7E-12 | 51  |
| WHR | rs809955   | 4:140874760  | A | -0.0155 | 0.0020 | 0.35 | 2.5E-14 | 89  |
| WHR | rs8103017  | 19:55999142  | C | -0.0165 | 0.0022 | 0.72 | 2.2E-14 | 89  |
| WHR | rs8141715  | 22:47214749  | T | -0.0136 | 0.0020 | 0.68 | 1.5E-11 | 65  |
| WHR | rs858516   | 17:7537098   | T | -0.0119 | 0.0020 | 0.58 | 1.6E-09 | 56  |
| WHR | rs861029   | 4:56245637   | T | -0.0135 | 0.0020 | 0.70 | 4.4E-11 | 62  |
| WHR | rs863750   | 12:124505444 | T | 0.0259  | 0.0017 | 0.58 | 6.2E-51 | 263 |
| WHR | rs889398   | 16:69556715  | T | -0.0171 | 0.0017 | 0.41 | 2.0E-23 | 114 |
| WHR | rs901630   | 6:98539519   | T | -0.0119 | 0.0017 | 0.35 | 6.8E-12 | 52  |
| WHR | rs905938   | 1:154991389  | T | 0.0126  | 0.0019 | 0.77 | 7.8E-11 | 45  |
| WHR | rs910382   | 20:51699189  | A | -0.0169 | 0.0018 | 0.45 | 2.4E-21 | 114 |
| WHR | rs929641   | 2:58792377   | A | 0.0127  | 0.0017 | 0.60 | 8.0E-14 | 62  |

|     |            |              |   |         |        |      |          |     |
|-----|------------|--------------|---|---------|--------|------|----------|-----|
| WHR | rs9296938  | 6:14573063   | A | -0.0145 | 0.0020 | 0.27 | 1.5E-12  | 67  |
| WHR | rs9362083  | 6:85396119   | A | -0.0117 | 0.0018 | 0.59 | 7.8E-11  | 53  |
| WHR | rs936226   | 15:75069282  | T | 0.0114  | 0.0019 | 0.70 | 2.0E-09  | 44  |
| WHR | rs9369425  | 6:43810974   | A | 0.0195  | 0.0019 | 0.69 | 1.1E-23  | 131 |
| WHR | rs9370243  | 6:53789830   | T | 0.0198  | 0.0032 | 0.10 | 1.1E-09  | 56  |
| WHR | rs946106   | 1:49928489   | T | -0.0170 | 0.0020 | 0.76 | 2.7E-17  | 84  |
| WHR | rs950732   | 10:94114633  | T | 0.0120  | 0.0018 | 0.51 | 2.4E-11  | 58  |
| WHR | rs9515201  | 13:111040798 | A | -0.0121 | 0.0018 | 0.29 | 6.6E-11  | 49  |
| WHR | rs9630986  | 2:181607751  | C | 0.0122  | 0.0019 | 0.71 | 1.0E-10  | 50  |
| WHR | rs9644033  | 8:23610639   | A | 0.0188  | 0.0021 | 0.78 | 2.1E-19  | 98  |
| WHR | rs9659380  | 1:98423149   | A | -0.0179 | 0.0024 | 0.78 | 5.2E-14  | 88  |
| WHR | rs979012   | 20:6623374   | T | 0.0116  | 0.0018 | 0.33 | 7.9E-11  | 48  |
| WHR | rs987237   | 6:50803050   | A | -0.0200 | 0.0022 | 0.80 | 1.0E-19  | 105 |
| WHR | rs9878908  | 3:12302462   | T | -0.0193 | 0.0021 | 0.79 | 3.4E-20  | 98  |
| WHR | rs9923544  | 16:53801985  | T | 0.0389  | 0.0017 | 0.42 | 1.2E-113 | 596 |
| WHR | rs9942009  | 3:89121921   | T | 0.0126  | 0.0018 | 0.40 | 3.0E-12  | 62  |
| WHR | rs9976841  | 21:39484323  | A | -0.0129 | 0.0018 | 0.49 | 2.1E-12  | 67  |
| WHR | rs998732   | 19:19378671  | A | 0.0165  | 0.0023 | 0.88 | 1.0E-12  | 48  |
| WHR | rs9988     | 17:73230856  | T | 0.0152  | 0.0024 | 0.86 | 1.9E-10  | 45  |
| WC  | rs10132280 | 14:25928179  | C | 0.0220  | 0.0037 | 0.68 | 2.2E-09  | 48  |
| WC  | rs10767658 | 11:27672252  | C | 0.0312  | 0.0037 | 0.33 | 3.3E-17  | 97  |
| WC  | rs10840100 | 11:8669437   | G | 0.0203  | 0.0035 | 0.63 | 5.4E-09  | 43  |
| WC  | rs10938397 | 4:45182527   | G | 0.0316  | 0.0035 | 0.45 | 6.1E-20  | 111 |
| WC  | rs10968576 | 9:28414339   | G | 0.0246  | 0.0036 | 0.34 | 1.2E-11  | 61  |
| WC  | rs11165623 | 1:96893000   | A | 0.0198  | 0.0034 | 0.44 | 5.2E-09  | 43  |
| WC  | rs12429545 | 13:54102206  | A | 0.0309  | 0.0052 | 0.14 | 2.5E-09  | 52  |
| WC  | rs12446632 | 16:19935389  | G | 0.0361  | 0.0050 | 0.88 | 5.2E-13  | 64  |
| WC  | rs12885454 | 14:29736838  | C | 0.0197  | 0.0035 | 0.65 | 2.6E-08  | 40  |

|    |            |              |   |        |        |      |          |     |
|----|------------|--------------|---|--------|--------|------|----------|-----|
| WC | rs1516725  | 3:185824004  | C | 0.0310 | 0.0051 | 0.87 | 1.7E-09  | 48  |
| WC | rs1549293  | 16:31141993  | C | 0.0201 | 0.0035 | 0.63 | 7.3E-09  | 42  |
| WC | rs1558902  | 16:53803574  | A | 0.0739 | 0.0035 | 0.40 | 3.7E-101 | 592 |
| WC | rs16894959 | 6:34825662   | C | 0.0262 | 0.0048 | 0.18 | 3.4E-08  | 46  |
| WC | rs16996700 | 20:50981945  | T | 0.0226 | 0.0037 | 0.76 | 1.5E-09  | 42  |
| WC | rs2033529  | 6:40348653   | G | 0.0209 | 0.0037 | 0.31 | 1.7E-08  | 42  |
| WC | rs2075650  | 19:45395619  | A | 0.0307 | 0.0050 | 0.84 | 8.9E-10  | 57  |
| WC | rs2112347  | 5:75015242   | T | 0.0254 | 0.0035 | 0.59 | 3.7E-10  | 70  |
| WC | rs2176040  | 2:227092802  | A | 0.0151 | 0.0035 | 0.36 | 1.5E-05  | 24  |
| WC | rs2287019  | 19:46202172  | C | 0.0351 | 0.0046 | 0.79 | 1.7E-14  | 93  |
| WC | rs2293576  | 11:47434986  | G | 0.0222 | 0.0036 | 0.70 | 9.4E-10  | 46  |
| WC | rs2325036  | 3:85819412   | A | 0.0232 | 0.0035 | 0.56 | 2.1E-11  | 60  |
| WC | rs2489623  | 6:127455821  | C | 0.0187 | 0.0034 | 0.53 | 3.4E-08  | 39  |
| WC | rs2531992  | 16:4021734   | G | 0.0282 | 0.0048 | 0.81 | 3.0E-09  | 54  |
| WC | rs2650492  | 16:28333411  | A | 0.0256 | 0.0038 | 0.27 | 2.5E-11  | 57  |
| WC | rs2820292  | 1:201784287  | C | 0.0189 | 0.0034 | 0.54 | 2.4E-08  | 40  |
| WC | rs3127553  | 1:49438005   | G | 0.0226 | 0.0035 | 0.38 | 1.6E-10  | 54  |
| WC | rs3810291  | 19:47569003  | A | 0.0259 | 0.0040 | 0.62 | 1.7E-10  | 71  |
| WC | rs3849570  | 3:81792112   | A | 0.0214 | 0.0038 | 0.39 | 2.2E-08  | 49  |
| WC | rs4130548  | 1:78463868   | C | 0.0220 | 0.0035 | 0.33 | 3.4E-10  | 48  |
| WC | rs4776970  | 15:68080886  | A | 0.0196 | 0.0035 | 0.64 | 2.3E-08  | 40  |
| WC | rs6163     | 10:104596924 | A | 0.0191 | 0.0035 | 0.39 | 3.7E-08  | 39  |
| WC | rs633715   | 1:177852580  | C | 0.0431 | 0.0043 | 0.21 | 3.3E-23  | 141 |
| WC | rs6545714  | 2:59307725   | G | 0.0220 | 0.0035 | 0.40 | 1.9E-10  | 52  |
| WC | rs6567160  | 18:57829135  | C | 0.0483 | 0.0040 | 0.22 | 2.6E-33  | 178 |
| WC | rs6755502  | 2:635721     | C | 0.0512 | 0.0045 | 0.82 | 2.0E-30  | 171 |
| WC | rs7138803  | 12:50247468  | A | 0.0282 | 0.0035 | 0.38 | 1.6E-15  | 84  |
| WC | rs7144011  | 14:79940383  | T | 0.0330 | 0.0041 | 0.23 | 9.4E-16  | 86  |

|     |             |              |   |         |        |      |         |     |
|-----|-------------|--------------|---|---------|--------|------|---------|-----|
| WC  | rs7239883   | 18:40147671  | G | 0.0207  | 0.0035 | 0.42 | 2.3E-09 | 47  |
| WC  | rs7498665   | 16:28883241  | G | 0.0338  | 0.0035 | 0.35 | 1.4E-22 | 117 |
| WC  | rs7531118   | 1:72837239   | C | 0.0268  | 0.0035 | 0.55 | 1.5E-14 | 80  |
| WC  | rs7550711   | 1:110082886  | T | 0.0577  | 0.0098 | 0.05 | 3.4E-09 | 71  |
| WC  | rs7903146   | 10:114758349 | C | 0.0219  | 0.0037 | 0.77 | 3.9E-09 | 39  |
| WC  | rs806794    | 6:26200677   | A | 0.0223  | 0.0037 | 0.62 | 2.1E-09 | 53  |
| WC  | rs929641    | 2:58792377   | A | 0.0207  | 0.0034 | 0.60 | 1.2E-09 | 46  |
| WC  | rs9400239   | 6:108977663  | C | 0.0244  | 0.0036 | 0.64 | 1.9E-11 | 62  |
| WC  | rs943005    | 6:50865820   | T | 0.0388  | 0.0044 | 0.19 | 7.2E-19 | 106 |
| VAT | rs10057588  | 5:43160167   | G | -0.0145 | 0.0026 | 0.41 | 3.8E-08 | 33  |
| VAT | rs10182458  | 2:25150641   | G | 0.0261  | 0.0025 | 0.44 | 5.9E-26 | 110 |
| VAT | rs10187101  | 2:50742227   | T | -0.0172 | 0.0026 | 0.41 | 2.7E-11 | 46  |
| VAT | rs10423928  | 19:46182304  | A | -0.0328 | 0.0031 | 0.24 | 1.0E-25 | 127 |
| VAT | rs10510025  | 10:118650996 | T | 0.0164  | 0.0029 | 0.26 | 1.4E-08 | 34  |
| VAT | rs10740991  | 10:22058137  | G | 0.0257  | 0.0028 | 0.28 | 1.3E-20 | 86  |
| VAT | rs10756714  | 9:15885041   | G | -0.0197 | 0.0025 | 0.48 | 3.4E-15 | 63  |
| VAT | rs10773302  | 12:123043145 | G | -0.0172 | 0.0028 | 0.24 | 7.7E-10 | 35  |
| VAT | rs10789334  | 1:72647903   | A | -0.0185 | 0.0030 | 0.19 | 4.2E-10 | 33  |
| VAT | rs10896012  | 11:65278461  | C | 0.0224  | 0.0030 | 0.14 | 9.5E-14 | 39  |
| VAT | rs10938398  | 4:45186139   | A | 0.0284  | 0.0025 | 0.45 | 1.0E-29 | 129 |
| VAT | rs11030112  | 11:27705188  | A | 0.0313  | 0.0026 | 0.32 | 2.7E-32 | 138 |
| VAT | rs11126734  | 2:27035978   | A | -0.0154 | 0.0025 | 0.41 | 8.0E-10 | 37  |
| VAT | rs111363146 | 7:44801682   | C | 0.0198  | 0.0036 | 0.09 | 3.6E-08 | 21  |
| VAT | rs11150745  | 17:78757626  | G | -0.0194 | 0.0027 | 0.29 | 3.1E-13 | 51  |
| VAT | rs11161044  | 14:29675957  | G | -0.0173 | 0.0032 | 0.25 | 4.5E-08 | 36  |
| VAT | rs11173521  | 12:60951398  | T | 0.0141  | 0.0025 | 0.45 | 1.9E-08 | 32  |
| VAT | rs112108364 | 13:86490590  | G | 0.0173  | 0.0028 | 0.37 | 3.3E-10 | 46  |
| VAT | rs113866544 | 17:46270606  | C | 0.0366  | 0.0049 | 0.10 | 1.2E-13 | 78  |

|     |             |              |   |         |        |      |         |     |
|-----|-------------|--------------|---|---------|--------|------|---------|-----|
| VAT | rs114067739 | 1:46260329   | A | -0.0366 | 0.0057 | 0.06 | 1.7E-10 | 52  |
| VAT | rs11679338  | 2:181606895  | C | -0.0172 | 0.0026 | 0.29 | 4.2E-11 | 40  |
| VAT | rs117151227 | 18:58121144  | C | -0.0618 | 0.0076 | 0.03 | 5.0E-16 | 64  |
| VAT | rs117176448 | 8:27261138   | G | 0.0248  | 0.0042 | 0.08 | 3.7E-09 | 31  |
| VAT | rs11776713  | 8:30861607   | C | -0.0151 | 0.0025 | 0.49 | 1.0E-09 | 37  |
| VAT | rs11880870  | 19:18830704  | G | -0.0185 | 0.0025 | 0.52 | 8.1E-14 | 56  |
| VAT | rs11896591  | 2:57239889   | G | 0.0137  | 0.0025 | 0.48 | 3.7E-08 | 30  |
| VAT | rs11917587  | 3:141207575  | A | 0.0144  | 0.0025 | 0.42 | 8.9E-09 | 33  |
| VAT | rs12001634  | 9:94186527   | A | -0.0161 | 0.0026 | 0.31 | 7.9E-10 | 36  |
| VAT | rs12101386  | 15:92571283  | T | -0.0164 | 0.0030 | 0.24 | 5.0E-08 | 32  |
| VAT | rs12103006  | 16:24726237  | A | -0.0166 | 0.0025 | 0.50 | 3.3E-11 | 45  |
| VAT | rs12200046  | 6:154315310  | T | 0.0218  | 0.0037 | 0.15 | 5.9E-09 | 40  |
| VAT | rs1225060   | 3:131637173  | A | 0.0232  | 0.0028 | 0.26 | 7.9E-17 | 67  |
| VAT | rs1229984   | 4:100239319  | T | -0.0498 | 0.0084 | 0.11 | 2.8E-09 | 156 |
| VAT | rs12335914  | 9:92209151   | C | 0.0160  | 0.0025 | 0.48 | 1.2E-10 | 42  |
| VAT | rs12409875  | 1:2424765    | A | -0.0143 | 0.0025 | 0.45 | 7.2E-09 | 33  |
| VAT | rs12435171  | 14:101155220 | G | 0.0163  | 0.0027 | 0.38 | 3.0E-09 | 40  |
| VAT | rs12459368  | 19:18459377  | G | -0.0199 | 0.0028 | 0.25 | 1.2E-12 | 48  |
| VAT | rs12477088  | 2:67841326   | C | -0.0203 | 0.0025 | 0.41 | 6.2E-16 | 65  |
| VAT | rs12632423  | 3:52041566   | A | -0.0227 | 0.0041 | 0.12 | 2.1E-08 | 35  |
| VAT | rs12739999  | 1:32207990   | A | 0.0217  | 0.0033 | 0.21 | 5.5E-11 | 51  |
| VAT | rs13017207  | 2:100841235  | A | -0.0196 | 0.0025 | 0.39 | 9.2E-15 | 60  |
| VAT | rs13062093  | 3:35667057   | G | 0.0197  | 0.0026 | 0.35 | 1.5E-14 | 58  |
| VAT | rs13075615  | 3:136505832  | T | -0.0217 | 0.0035 | 0.11 | 4.0E-10 | 30  |
| VAT | rs13097150  | 3:62433911   | T | 0.0154  | 0.0026 | 0.36 | 2.0E-09 | 35  |
| VAT | rs13135092  | 4:103198082  | G | 0.0326  | 0.0045 | 0.05 | 7.3E-13 | 31  |
| VAT | rs13192865  | 6:97929355   | A | -0.0182 | 0.0028 | 0.26 | 8.8E-11 | 41  |
| VAT | rs13263674  | 8:14238841   | G | 0.0171  | 0.0027 | 0.25 | 4.7E-10 | 35  |

|     |             |              |   |         |        |      |         |     |
|-----|-------------|--------------|---|---------|--------|------|---------|-----|
| VAT | rs13337177  | 16:2175323   | T | -0.0228 | 0.0032 | 0.18 | 2.0E-12 | 49  |
| VAT | rs13393304  | 2:637830     | A | -0.0445 | 0.0033 | 0.18 | 6.1E-42 | 186 |
| VAT | rs1446585   | 2:136407479  | G | -0.0169 | 0.0030 | 0.36 | 1.2E-08 | 43  |
| VAT | rs145350287 | 12:120907309 | A | -0.0424 | 0.0063 | 0.04 | 1.9E-11 | 40  |
| VAT | rs1454687   | 3:94038085   | C | 0.0230  | 0.0025 | 0.46 | 1.5E-20 | 86  |
| VAT | rs1474518   | 8:116825690  | C | -0.0181 | 0.0029 | 0.25 | 6.6E-10 | 40  |
| VAT | rs148168215 | 9:30835804   | T | -0.0532 | 0.0094 | 0.02 | 1.5E-08 | 36  |
| VAT | rs1559677   | 15:47738063  | G | 0.0149  | 0.0025 | 0.42 | 4.2E-09 | 35  |
| VAT | rs1591726   | 1:49963473   | T | 0.0223  | 0.0027 | 0.37 | 4.1E-17 | 76  |
| VAT | rs1652376   | 18:21109466  | T | -0.0209 | 0.0025 | 0.48 | 4.2E-17 | 71  |
| VAT | rs17239176  | 10:107744042 | C | -0.0166 | 0.0030 | 0.24 | 2.9E-08 | 33  |
| VAT | rs1724557   | 4:137094048  | C | 0.0156  | 0.0025 | 0.48 | 6.9E-10 | 39  |
| VAT | rs17589357  | 15:35927468  | C | -0.0199 | 0.0035 | 0.09 | 1.1E-08 | 22  |
| VAT | rs1762509   | 1:107592959  | A | 0.0157  | 0.0026 | 0.31 | 2.2E-09 | 35  |
| VAT | rs17682873  | 17:52940772  | T | 0.0196  | 0.0035 | 0.12 | 3.1E-08 | 27  |
| VAT | rs17770336  | 9:28414625   | T | 0.0247  | 0.0026 | 0.34 | 7.9E-21 | 90  |
| VAT | rs1834144   | 18:40744790  | A | -0.0181 | 0.0026 | 0.42 | 1.7E-12 | 52  |
| VAT | rs1928496   | 13:31012904  | C | -0.0211 | 0.0028 | 0.30 | 9.3E-14 | 60  |
| VAT | rs2020942   | 17:28546914  | T | 0.0152  | 0.0025 | 0.42 | 2.3E-09 | 36  |
| VAT | rs2102278   | 4:52818664   | G | 0.0157  | 0.0027 | 0.34 | 3.5E-09 | 36  |
| VAT | rs215628    | 7:32360096   | C | 0.0158  | 0.0026 | 0.35 | 6.5E-10 | 37  |
| VAT | rs2172131   | 10:133978962 | T | 0.0169  | 0.0025 | 0.46 | 1.9E-11 | 46  |
| VAT | rs217669    | 14:62360075  | C | 0.0175  | 0.0028 | 0.25 | 3.3E-10 | 37  |
| VAT | rs2253310   | 6:108888593  | C | -0.0209 | 0.0026 | 0.42 | 3.2E-16 | 70  |
| VAT | rs2285640   | 17:34951204  | G | 0.0200  | 0.0025 | 0.45 | 7.6E-16 | 64  |
| VAT | rs2304608   | 5:87962298   | A | 0.0299  | 0.0034 | 0.15 | 1.9E-18 | 76  |
| VAT | rs2307111   | 5:75003678   | C | -0.0260 | 0.0025 | 0.43 | 1.1E-24 | 108 |
| VAT | rs2448916   | 8:95308350   | A | -0.0140 | 0.0026 | 0.45 | 3.6E-08 | 32  |

|     |            |             |   |         |        |      |         |    |
|-----|------------|-------------|---|---------|--------|------|---------|----|
| VAT | rs245775   | 5:170532105 | A | -0.0196 | 0.0028 | 0.31 | 2.2E-12 | 53 |
| VAT | rs2472297  | 15:75027880 | T | 0.0166  | 0.0028 | 0.24 | 3.1E-09 | 32 |
| VAT | rs247975   | 3:173107443 | T | -0.0144 | 0.0025 | 0.44 | 7.5E-09 | 33 |
| VAT | rs2481665  | 1:62594677  | C | -0.0178 | 0.0025 | 0.37 | 7.8E-13 | 48 |
| VAT | rs2499468  | 6:51809081  | C | -0.0156 | 0.0026 | 0.31 | 2.0E-09 | 34 |
| VAT | rs2537621  | 7:5557255   | C | 0.0146  | 0.0026 | 0.38 | 1.3E-08 | 33 |
| VAT | rs254024   | 5:103944020 | T | 0.0156  | 0.0025 | 0.41 | 4.2E-10 | 38 |
| VAT | rs264932   | 2:104288396 | A | 0.0139  | 0.0025 | 0.40 | 3.7E-08 | 30 |
| VAT | rs2667761  | 15:77883130 | C | -0.0159 | 0.0026 | 0.41 | 7.3E-10 | 40 |
| VAT | rs2678204  | 1:201800511 | G | 0.0231  | 0.0026 | 0.30 | 1.2E-18 | 73 |
| VAT | rs2730806  | 12:41866904 | T | 0.0165  | 0.0025 | 0.47 | 3.4E-11 | 44 |
| VAT | rs2744973  | 6:34580221  | T | 0.0214  | 0.0027 | 0.32 | 2.0E-15 | 65 |
| VAT | rs2799465  | 9:126544609 | C | 0.0213  | 0.0037 | 0.16 | 6.0E-09 | 40 |
| VAT | rs2804477  | 10:33720175 | A | 0.0211  | 0.0036 | 0.13 | 5.5E-09 | 33 |
| VAT | rs2926614  | 8:76301610  | T | -0.0224 | 0.0032 | 0.20 | 4.2E-12 | 53 |
| VAT | rs2926864  | 5:153213196 | A | 0.0175  | 0.0026 | 0.31 | 2.7E-11 | 42 |
| VAT | rs2962082  | 16:62816628 | A | -0.0154 | 0.0025 | 0.46 | 6.7E-10 | 38 |
| VAT | rs329124   | 5:133865452 | G | -0.0138 | 0.0025 | 0.42 | 4.2E-08 | 30 |
| VAT | rs34431565 | 6:31782180  | T | -0.0340 | 0.0059 | 0.05 | 9.1E-09 | 32 |
| VAT | rs34811474 | 4:25408838  | A | -0.0191 | 0.0029 | 0.22 | 7.0E-11 | 41 |
| VAT | rs35060985 | 11:43693110 | A | 0.0234  | 0.0027 | 0.31 | 2.5E-18 | 76 |
| VAT | rs35697587 | 14:47298505 | G | 0.0167  | 0.0025 | 0.46 | 1.6E-11 | 45 |
| VAT | rs35972789 | 10:75519691 | A | -0.0396 | 0.0065 | 0.03 | 1.0E-09 | 28 |
| VAT | rs362307   | 4:3241845   | T | 0.0287  | 0.0048 | 0.07 | 2.0E-09 | 35 |
| VAT | rs3759094  | 12:56497903 | T | -0.0152 | 0.0026 | 0.33 | 7.1E-09 | 33 |
| VAT | rs3774063  | 3:9511736   | T | 0.0238  | 0.0041 | 0.08 | 6.6E-09 | 27 |
| VAT | rs3784692  | 15:67988133 | C | -0.0244 | 0.0025 | 0.39 | 5.7E-22 | 92 |
| VAT | rs3787075  | 20:25186502 | G | 0.0178  | 0.0026 | 0.34 | 1.3E-11 | 46 |



|     |            |              |   |         |        |      |         |     |
|-----|------------|--------------|---|---------|--------|------|---------|-----|
| VAT | rs3791687  | 2:212258767  | T | 0.0191  | 0.0030 | 0.23 | 1.2E-10 | 42  |
| VAT | rs3803253  | 13:99117149  | A | -0.0163 | 0.0027 | 0.26 | 2.4E-09 | 34  |
| VAT | rs3826408  | 17:7101292   | T | 0.0143  | 0.0025 | 0.49 | 8.0E-09 | 33  |
| VAT | rs3843540  | 7:99126640   | C | -0.0256 | 0.0035 | 0.21 | 2.2E-13 | 72  |
| VAT | rs3943933  | 5:63020327   | A | 0.0166  | 0.0025 | 0.55 | 2.2E-11 | 44  |
| VAT | rs40067    | 5:107439012  | A | -0.0245 | 0.0033 | 0.21 | 1.6E-13 | 64  |
| VAT | rs4073582  | 11:66050712  | A | -0.0175 | 0.0026 | 0.32 | 1.2E-11 | 43  |
| VAT | rs4148866  | 12:123425575 | T | 0.0153  | 0.0025 | 0.41 | 1.3E-09 | 37  |
| VAT | rs4239060  | 17:1844519   | A | -0.0256 | 0.0032 | 0.21 | 9.0E-16 | 70  |
| VAT | rs429358   | 19:45411941  | C | -0.0304 | 0.0034 | 0.17 | 4.6E-19 | 84  |
| VAT | rs4399192  | 1:98376502   | G | 0.0178  | 0.0030 | 0.29 | 1.8E-09 | 42  |
| VAT | rs4402589  | 16:29954654  | T | -0.0263 | 0.0025 | 0.50 | 6.2E-26 | 112 |
| VAT | rs4419475  | 4:96150044   | T | 0.0139  | 0.0025 | 0.46 | 3.7E-08 | 31  |
| VAT | rs4482463  | 2:205375909  | C | 0.0362  | 0.0047 | 0.09 | 1.7E-14 | 73  |
| VAT | rs4500930  | 2:228985505  | T | 0.0171  | 0.0026 | 0.33 | 5.8E-11 | 42  |
| VAT | rs4558773  | 3:82710125   | A | 0.0172  | 0.0026 | 0.33 | 2.2E-11 | 42  |
| VAT | rs4562625  | 1:209218583  | C | 0.0150  | 0.0025 | 0.40 | 3.8E-09 | 35  |
| VAT | rs4807179  | 19:1956035   | G | -0.0146 | 0.0026 | 0.40 | 1.5E-08 | 33  |
| VAT | rs4808762  | 19:18326222  | C | 0.0289  | 0.0027 | 0.26 | 3.6E-26 | 104 |
| VAT | rs4809221  | 20:62372706  | G | -0.0146 | 0.0026 | 0.29 | 3.2E-08 | 28  |
| VAT | rs4842920  | 15:84539424  | T | -0.0154 | 0.0028 | 0.30 | 2.4E-08 | 32  |
| VAT | rs4872376  | 8:25759022   | C | -0.0138 | 0.0025 | 0.44 | 2.7E-08 | 31  |
| VAT | rs4929923  | 11:8639200   | T | -0.0180 | 0.0026 | 0.37 | 3.8E-12 | 49  |
| VAT | rs496072   | 4:171055797  | T | 0.0139  | 0.0025 | 0.47 | 3.4E-08 | 31  |
| VAT | rs538656   | 18:57850422  | T | 0.0453  | 0.0029 | 0.22 | 1.8E-54 | 229 |
| VAT | rs539515   | 1:177889025  | C | 0.0380  | 0.0031 | 0.18 | 1.4E-35 | 140 |
| VAT | rs55726687 | 12:991306    | A | 0.0227  | 0.0030 | 0.21 | 8.1E-14 | 55  |
| VAT | rs55742087 | 3:185830488  | T | -0.0233 | 0.0032 | 0.17 | 3.6E-13 | 49  |

|     |            |              |   |         |        |      |          |     |
|-----|------------|--------------|---|---------|--------|------|----------|-----|
| VAT | rs55769038 | 11:13331808  | G | -0.0159 | 0.0025 | 0.48 | 3.4E-10  | 41  |
| VAT | rs55911231 | 13:96983940  | T | 0.0148  | 0.0025 | 0.48 | 4.3E-09  | 36  |
| VAT | rs56094641 | 16:53806453  | G | 0.0647  | 0.0025 | 0.40 | 3.8E-145 | 656 |
| VAT | rs56356382 | 19:4064057   | C | -0.0217 | 0.0032 | 0.16 | 6.5E-12  | 42  |
| VAT | rs57241669 | 4:175246482  | G | -0.0257 | 0.0047 | 0.09 | 3.9E-08  | 35  |
| VAT | rs577525   | 10:99769388  | T | -0.0177 | 0.0025 | 0.49 | 1.5E-12  | 51  |
| VAT | rs58120873 | 2:47313562   | A | -0.0248 | 0.0045 | 0.08 | 2.7E-08  | 30  |
| VAT | rs59066241 | 12:97925364  | G | 0.0212  | 0.0039 | 0.16 | 4.4E-08  | 40  |
| VAT | rs60377014 | 3:88187052   | T | -0.0203 | 0.0035 | 0.16 | 4.5E-09  | 36  |
| VAT | rs6096886  | 20:50951298  | G | -0.0284 | 0.0032 | 0.17 | 2.4E-19  | 75  |
| VAT | rs61537964 | 1:115585759  | G | -0.0231 | 0.0040 | 0.12 | 8.1E-09  | 38  |
| VAT | rs61813293 | 1:156019075  | T | 0.0237  | 0.0035 | 0.15 | 1.9E-11  | 45  |
| VAT | rs61903695 | 11:89922417  | G | 0.0168  | 0.0028 | 0.24 | 3.0E-09  | 34  |
| VAT | rs61910767 | 11:134515899 | T | -0.0229 | 0.0033 | 0.14 | 7.0E-12  | 40  |
| VAT | rs62024481 | 15:99238661  | T | -0.0177 | 0.0031 | 0.18 | 1.1E-08  | 30  |
| VAT | rs62084234 | 17:65847060  | G | 0.0255  | 0.0031 | 0.23 | 3.7E-16  | 75  |
| VAT | rs62104473 | 19:30289779  | T | 0.0192  | 0.0026 | 0.33 | 3.5E-13  | 53  |
| VAT | rs62183012 | 2:159607760  | C | -0.0162 | 0.0027 | 0.29 | 3.0E-09  | 35  |
| VAT | rs62190394 | 2:230624929  | T | 0.0219  | 0.0027 | 0.32 | 2.0E-16  | 68  |
| VAT | rs62261725 | 3:85898626   | G | -0.0214 | 0.0026 | 0.35 | 5.5E-16  | 68  |
| VAT | rs62262093 | 3:49960388   | T | -0.0299 | 0.0025 | 0.59 | 1.3E-33  | 141 |
| VAT | rs62413414 | 6:80310375   | T | 0.0198  | 0.0034 | 0.14 | 8.8E-09  | 31  |
| VAT | rs62473743 | 7:76610299   | A | 0.0198  | 0.0034 | 0.22 | 6.8E-09  | 44  |
| VAT | rs62477685 | 7:75101707   | T | -0.0195 | 0.0025 | 0.48 | 7.8E-15  | 62  |
| VAT | rs6433243  | 2:171605495  | T | 0.0162  | 0.0026 | 0.33 | 4.6E-10  | 38  |
| VAT | rs6536575  | 4:162091639  | T | -0.0141 | 0.0025 | 0.45 | 1.5E-08  | 32  |
| VAT | rs653958   | 1:96884006   | G | 0.0187  | 0.0026 | 0.40 | 3.3E-13  | 55  |
| VAT | rs66679256 | 4:18351898   | T | 0.0185  | 0.0025 | 0.40 | 1.3E-13  | 53  |

|     |            |              |   |         |        |      |         |     |
|-----|------------|--------------|---|---------|--------|------|---------|-----|
| VAT | rs669696   | 16:69626136  | A | -0.0242 | 0.0025 | 0.41 | 6.2E-22 | 93  |
| VAT | rs6739755  | 2:59330227   | A | 0.0227  | 0.0025 | 0.40 | 4.0E-19 | 80  |
| VAT | rs67463976 | 7:70045443   | C | 0.0163  | 0.0025 | 0.42 | 9.1E-11 | 42  |
| VAT | rs684214   | 17:40696915  | T | 0.0179  | 0.0028 | 0.25 | 8.4E-11 | 39  |
| VAT | rs7021721  | 9:111963641  | C | -0.0154 | 0.0027 | 0.29 | 1.7E-08 | 32  |
| VAT | rs7035637  | 9:16739403   | A | 0.0187  | 0.0028 | 0.27 | 3.6E-11 | 44  |
| VAT | rs704061   | 12:89771903  | C | 0.0165  | 0.0025 | 0.41 | 3.9E-11 | 43  |
| VAT | rs7132908  | 12:50263148  | A | 0.0255  | 0.0025 | 0.38 | 1.2E-23 | 100 |
| VAT | rs7156625  | 14:79942647  | A | 0.0269  | 0.0030 | 0.23 | 2.0E-19 | 83  |
| VAT | rs7165759  | 15:80988600  | A | -0.0175 | 0.0027 | 0.27 | 1.0E-10 | 40  |
| VAT | rs71658797 | 1:77967507   | A | 0.0347  | 0.0038 | 0.12 | 4.8E-20 | 82  |
| VAT | rs719802   | 11:113234679 | T | 0.0174  | 0.0025 | 0.37 | 7.8E-12 | 46  |
| VAT | rs72663503 | 1:39969059   | T | 0.0209  | 0.0030 | 0.22 | 1.7E-12 | 49  |
| VAT | rs72892910 | 6:50816887   | T | 0.0362  | 0.0033 | 0.20 | 7.2E-28 | 135 |
| VAT | rs72995085 | 6:143193971  | C | -0.0215 | 0.0032 | 0.20 | 3.8E-11 | 48  |
| VAT | rs73033486 | 7:2908277    | A | 0.0207  | 0.0037 | 0.11 | 3.0E-08 | 27  |
| VAT | rs7308188  | 12:103701537 | C | -0.0187 | 0.0029 | 0.29 | 5.7E-11 | 46  |
| VAT | rs73213484 | 4:28489339   | T | -0.0211 | 0.0036 | 0.16 | 4.1E-09 | 38  |
| VAT | rs7324067  | 13:65484906  | T | -0.0165 | 0.0029 | 0.27 | 1.2E-08 | 35  |
| VAT | rs74934567 | 3:61239698   | G | -0.0220 | 0.0034 | 0.16 | 1.2E-10 | 42  |
| VAT | rs7498665  | 16:28883241  | G | 0.0269  | 0.0025 | 0.35 | 1.8E-26 | 107 |
| VAT | rs754635   | 3:42305131   | C | -0.0230 | 0.0039 | 0.13 | 3.3E-09 | 39  |
| VAT | rs7550711  | 1:110082886  | T | 0.0615  | 0.0079 | 0.05 | 5.2E-15 | 117 |
| VAT | rs7586854  | 2:188075837  | T | -0.0145 | 0.0025 | 0.51 | 5.6E-09 | 34  |
| VAT | rs76040172 | 21:46488959  | A | -0.0451 | 0.0055 | 0.07 | 2.6E-16 | 91  |
| VAT | rs76111507 | 2:455477     | T | -0.0754 | 0.0066 | 0.02 | 1.7E-30 | 77  |
| VAT | rs76327888 | 14:103380403 | T | 0.0230  | 0.0033 | 0.21 | 2.9E-12 | 57  |
| VAT | rs7649970  | 3:12392272   | T | 0.0255  | 0.0038 | 0.15 | 1.8E-11 | 55  |

|     |            |              |   |         |        |      |         |    |
|-----|------------|--------------|---|---------|--------|------|---------|----|
| VAT | rs7654647  | 4:80810453   | T | 0.0155  | 0.0025 | 0.35 | 6.9E-10 | 36 |
| VAT | rs7724430  | 5:153546427  | A | 0.0139  | 0.0025 | 0.44 | 2.7E-08 | 31 |
| VAT | rs7773094  | 6:129440026  | C | -0.0177 | 0.0031 | 0.20 | 1.2E-08 | 33 |
| VAT | rs778094   | 2:147903802  | G | 0.0150  | 0.0025 | 0.49 | 2.6E-09 | 36 |
| VAT | rs7788950  | 7:71580718   | A | -0.0175 | 0.0032 | 0.21 | 5.0E-08 | 33 |
| VAT | rs7822494  | 8:87476439   | C | -0.0162 | 0.0025 | 0.41 | 6.5E-11 | 42 |
| VAT | rs7845090  | 8:73449940   | G | 0.0201  | 0.0028 | 0.29 | 3.2E-13 | 54 |
| VAT | rs7849553  | 9:73832360   | C | 0.0141  | 0.0025 | 0.48 | 1.4E-08 | 32 |
| VAT | rs7864091  | 9:96346188   | A | 0.0186  | 0.0034 | 0.20 | 2.9E-08 | 36 |
| VAT | rs78719460 | 12:133395038 | A | 0.0159  | 0.0027 | 0.26 | 2.8E-09 | 32 |
| VAT | rs7893571  | 10:16750129  | G | -0.0179 | 0.0026 | 0.31 | 1.2E-11 | 45 |
| VAT | rs7942037  | 11:30430332  | C | -0.0169 | 0.0026 | 0.32 | 5.6E-11 | 40 |
| VAT | rs7982447  | 13:54453811  | C | 0.0208  | 0.0031 | 0.21 | 1.6E-11 | 46 |
| VAT | rs8015400  | 14:25930988  | C | -0.0199 | 0.0027 | 0.36 | 5.2E-14 | 59 |
| VAT | rs8074454  | 17:3981148   | C | 0.0174  | 0.0026 | 0.30 | 3.8E-11 | 42 |
| VAT | rs809955   | 4:140874760  | A | -0.0158 | 0.0026 | 0.35 | 7.5E-10 | 37 |
| VAT | rs8103728  | 19:33900257  | C | -0.0152 | 0.0026 | 0.36 | 8.0E-09 | 35 |
| VAT | rs879620   | 16:4015729   | C | -0.0206 | 0.0026 | 0.43 | 9.0E-16 | 68 |
| VAT | rs916289   | 13:33366248  | T | -0.0138 | 0.0025 | 0.43 | 3.3E-08 | 30 |
| VAT | rs9277979  | 6:33294098   | T | 0.0231  | 0.0032 | 0.14 | 8.8E-13 | 42 |
| VAT | rs9304665  | 19:47602577  | T | -0.0165 | 0.0029 | 0.29 | 1.7E-08 | 37 |
| VAT | rs9320823  | 6:98429337   | T | -0.0232 | 0.0025 | 0.34 | 4.9E-20 | 79 |
| VAT | rs9358912  | 6:26211146   | T | -0.0246 | 0.0028 | 0.32 | 1.2E-18 | 86 |
| VAT | rs9471333  | 6:40362023   | C | 0.0244  | 0.0025 | 0.53 | 1.1E-22 | 96 |
| VAT | rs9512696  | 13:28012527  | A | -0.0144 | 0.0026 | 0.36 | 4.0E-08 | 31 |
| VAT | rs9522285  | 13:112230701 | A | 0.0187  | 0.0025 | 0.45 | 9.6E-14 | 56 |
| VAT | rs9569934  | 13:59257944  | T | -0.0188 | 0.0032 | 0.18 | 4.0E-09 | 34 |
| VAT | rs9641499  | 7:112984493  | A | -0.0178 | 0.0025 | 0.41 | 1.2E-12 | 50 |

|                    |            |              |   |         |        |      |         |     |
|--------------------|------------|--------------|---|---------|--------|------|---------|-----|
| VAT                | rs9832402  | 3:173742542  | G | -0.0170 | 0.0029 | 0.26 | 3.0E-09 | 36  |
| VAT                | rs9843340  | 3:156317073  | C | -0.0221 | 0.0035 | 0.15 | 1.7E-10 | 40  |
| VAT                | rs9925945  | 16:393564    | C | -0.0175 | 0.0028 | 0.22 | 7.0E-10 | 34  |
| VAT                | rs9989141  | 14:94006257  | C | -0.0201 | 0.0026 | 0.39 | 6.8E-15 | 62  |
| Smoking Initiation | rs10042827 | 5:170299916  | T | -0.0167 | 0.0027 | 0.33 | 9.4E-10 | 153 |
| Smoking Initiation | rs1004787  | 2:45159091   | G | -0.0284 | 0.0026 | 0.39 | 1.1E-28 | 472 |
| Smoking Initiation | rs10060196 | 5:106455988  | C | -0.0183 | 0.0026 | 0.39 | 1.3E-12 | 197 |
| Smoking Initiation | rs1008078  | 1:91189731   | C | -0.0228 | 0.0026 | 0.50 | 1.6E-18 | 321 |
| Smoking Initiation | rs1022376  | 2:22067213   | T | 0.0147  | 0.0026 | 0.49 | 1.7E-08 | 134 |
| Smoking Initiation | rs10233018 | 7:117523709  | A | -0.0246 | 0.0025 | 0.43 | 4.8E-22 | 367 |
| Smoking Initiation | rs10279261 | 7:133589846  | G | 0.0189  | 0.0026 | 0.37 | 6.1E-13 | 204 |
| Smoking Initiation | rs1030015  | 7:78139581   | G | -0.0143 | 0.0026 | 0.49 | 2.2E-08 | 126 |
| Smoking Initiation | rs10446419 | 3:25725501   | A | 0.0196  | 0.0031 | 0.79 | 5.1E-10 | 158 |
| Smoking Initiation | rs10490159 | 2:51341259   | C | -0.0172 | 0.0026 | 0.62 | 3.9E-11 | 173 |
| Smoking Initiation | rs1050847  | 16:87443734  | C | 0.0148  | 0.0026 | 0.50 | 7.4E-09 | 135 |
| Smoking Initiation | rs10698713 | 6:158882320  | G | 0.0335  | 0.0056 | 0.98 | 2.4E-09 | 48  |
| Smoking Initiation | rs10789369 | 1:73824909   | A | 0.0234  | 0.0026 | 0.37 | 3.4E-19 | 317 |
| Smoking Initiation | rs10805858 | 5:88873832   | A | -0.0181 | 0.0027 | 0.67 | 1.9E-11 | 178 |
| Smoking Initiation | rs10853981 | 19:4965064   | G | -0.0148 | 0.0027 | 0.71 | 4.9E-08 | 111 |
| Smoking Initiation | rs10858334 | 9:137989785  | C | -0.0229 | 0.0038 | 0.89 | 1.2E-09 | 122 |
| Smoking Initiation | rs10873871 | 1:76689019   | A | -0.0175 | 0.0031 | 0.80 | 2.8E-08 | 119 |
| Smoking Initiation | rs10885480 | 10:115378364 | T | 0.0187  | 0.0028 | 0.71 | 3.8E-11 | 178 |
| Smoking Initiation | rs10905461 | 10:8803551   | T | 0.0164  | 0.0029 | 0.25 | 2.4E-08 | 123 |
| Smoking Initiation | rs10914684 | 1:33795572   | G | 0.0158  | 0.0027 | 0.68 | 6.3E-09 | 135 |
| Smoking Initiation | rs10935779 | 3:149543102  | C | 0.0143  | 0.0026 | 0.57 | 2.9E-08 | 124 |
| Smoking Initiation | rs10945141 | 6:69470709   | G | -0.0181 | 0.0029 | 0.74 | 3.6E-10 | 154 |
| Smoking Initiation | rs10953957 | 7:121954709  | G | -0.0144 | 0.0026 | 0.60 | 3.7E-08 | 123 |
| Smoking Initiation | rs10966092 | 9:23831658   | T | 0.0205  | 0.0029 | 0.70 | 1.1E-12 | 218 |

|                    |             |              |   |         |        |      |         |     |
|--------------------|-------------|--------------|---|---------|--------|------|---------|-----|
| Smoking Initiation | rs10969352  | 9:29747488   | T | -0.0143 | 0.0025 | 0.54 | 1.8E-08 | 126 |
| Smoking Initiation | rs11057005  | 12:16748721  | A | 0.0157  | 0.0026 | 0.50 | 9.1E-10 | 152 |
| Smoking Initiation | rs1106363   | 11:131966264 | C | -0.0174 | 0.0027 | 0.61 | 9.2E-11 | 178 |
| Smoking Initiation | rs11076962  | 16:5811367   | T | -0.0183 | 0.0028 | 0.73 | 1.2E-10 | 162 |
| Smoking Initiation | rs1108130   | 13:100648356 | T | -0.0239 | 0.0031 | 0.75 | 1.6E-14 | 267 |
| Smoking Initiation | rs1109480   | 12:121083279 | G | 0.0167  | 0.0026 | 0.65 | 1.8E-10 | 156 |
| Smoking Initiation | rs11128203  | 3:71064431   | T | -0.0204 | 0.0026 | 0.52 | 1.3E-15 | 256 |
| Smoking Initiation | rs11162019  | 1:87913176   | C | 0.0155  | 0.0026 | 0.66 | 5.1E-09 | 133 |
| Smoking Initiation | rs1116690   | 4:143510148  | A | -0.0163 | 0.0029 | 0.26 | 2.2E-08 | 127 |
| Smoking Initiation | rs11192347  | 10:106929313 | G | 0.0265  | 0.0043 | 0.92 | 6.2E-10 | 130 |
| Smoking Initiation | rs11258417  | 10:13533053  | C | 0.0145  | 0.0026 | 0.67 | 2.7E-08 | 114 |
| Smoking Initiation | rs1126757   | 19:55879872  | C | -0.0142 | 0.0026 | 0.47 | 2.9E-08 | 123 |
| Smoking Initiation | rs112725451 | 4:68017710   | C | -0.0261 | 0.0034 | 0.82 | 1.6E-14 | 249 |
| Smoking Initiation | rs113230003 | 19:18460956  | G | 0.0189  | 0.0029 | 0.76 | 1.1E-10 | 159 |
| Smoking Initiation | rs1139897   | 16:720986    | G | 0.0241  | 0.0030 | 0.68 | 1.8E-15 | 313 |
| Smoking Initiation | rs114976176 | 2:264621     | A | 0.0155  | 0.0027 | 0.69 | 6.0E-09 | 127 |
| Smoking Initiation | rs1150668   | 6:28129789   | T | 0.0185  | 0.0026 | 0.54 | 8.5E-13 | 210 |
| Smoking Initiation | rs11594623  | 10:103960351 | T | -0.0274 | 0.0030 | 0.78 | 7.5E-20 | 319 |
| Smoking Initiation | rs1160685   | 4:94052854   | C | -0.0153 | 0.0026 | 0.58 | 2.3E-09 | 140 |
| Smoking Initiation | rs11611651  | 12:133380790 | G | -0.0271 | 0.0045 | 0.94 | 2.1E-09 | 106 |
| Smoking Initiation | rs11642231  | 16:89608702  | G | 0.0156  | 0.0026 | 0.59 | 3.4E-09 | 145 |
| Smoking Initiation | rs11651955  | 17:16235462  | G | 0.0140  | 0.0025 | 0.53 | 3.7E-08 | 121 |
| Smoking Initiation | rs11692435  | 2:98275354   | G | -0.0251 | 0.0046 | 0.79 | 4.5E-08 | 254 |
| Smoking Initiation | rs11713899  | 3:2365026    | A | -0.0187 | 0.0034 | 0.84 | 3.1E-08 | 115 |
| Smoking Initiation | rs1173461   | 5:157707571  | C | -0.0166 | 0.0027 | 0.68 | 9.5E-10 | 147 |
| Smoking Initiation | rs117657830 | 16:75766873  | A | 0.0378  | 0.0064 | 0.97 | 3.2E-09 | 93  |
| Smoking Initiation | rs11766326  | 7:111100585  | T | 0.0175  | 0.0026 | 0.49 | 1.8E-11 | 190 |
| Smoking Initiation | rs11768481  | 7:96629103   | C | 0.0186  | 0.0027 | 0.60 | 5.2E-12 | 204 |

|                    |             |              |   |         |        |      |         |     |
|--------------------|-------------|--------------|---|---------|--------|------|---------|-----|
| Smoking Initiation | rs117734003 | 19:51129745  | G | -0.0303 | 0.0051 | 0.92 | 2.6E-09 | 159 |
| Smoking Initiation | rs11783093  | 8:27425349   | C | 0.0471  | 0.0035 | 0.87 | 2.1E-41 | 631 |
| Smoking Initiation | rs11791671  | 9:3398679    | C | -0.0279 | 0.0051 | 0.95 | 4.2E-08 | 85  |
| Smoking Initiation | rs118202    | 6:111658371  | G | 0.0367  | 0.0033 | 0.27 | 1.9E-29 | 660 |
| Smoking Initiation | rs11872397  | 18:72535282  | G | 0.0171  | 0.0029 | 0.77 | 5.2E-09 | 127 |
| Smoking Initiation | rs1187820   | 3:173072584  | C | 0.0143  | 0.0026 | 0.60 | 2.7E-08 | 120 |
| Smoking Initiation | rs11956866  | 5:161018271  | T | 0.0148  | 0.0026 | 0.49 | 7.8E-09 | 136 |
| Smoking Initiation | rs12022778  | 1:50603995   | A | -0.0268 | 0.0032 | 0.79 | 3.2E-17 | 292 |
| Smoking Initiation | rs12027999  | 1:154206358  | T | 0.0244  | 0.0039 | 0.87 | 5.3E-10 | 168 |
| Smoking Initiation | rs12130857  | 1:7791461    | G | 0.0180  | 0.0027 | 0.70 | 3.7E-11 | 168 |
| Smoking Initiation | rs12195240  | 6:98636905   | G | -0.0249 | 0.0028 | 0.69 | 1.1E-18 | 328 |
| Smoking Initiation | rs12244388  | 10:104640052 | G | -0.0258 | 0.0027 | 0.62 | 4.3E-22 | 388 |
| Smoking Initiation | rs12474587  | 2:162802993  | G | -0.0242 | 0.0026 | 0.63 | 4.8E-21 | 336 |
| Smoking Initiation | rs12517438  | 5:30842054   | T | -0.0154 | 0.0026 | 0.50 | 1.9E-09 | 145 |
| Smoking Initiation | rs12563365  | 1:236872829  | G | -0.0166 | 0.0026 | 0.46 | 1.1E-10 | 168 |
| Smoking Initiation | rs12633090  | 3:83241365   | G | 0.0230  | 0.0033 | 0.84 | 3.2E-12 | 171 |
| Smoking Initiation | rs12714017  | 2:80999398   | T | -0.0154 | 0.0026 | 0.54 | 3.7E-09 | 145 |
| Smoking Initiation | rs12739243  | 1:210302043  | T | 0.0213  | 0.0031 | 0.73 | 4.4E-12 | 218 |
| Smoking Initiation | rs12740789  | 1:72752073   | G | 0.0285  | 0.0033 | 0.86 | 1.2E-17 | 245 |
| Smoking Initiation | rs12755632  | 1:41776623   | A | 0.0154  | 0.0027 | 0.67 | 1.9E-08 | 130 |
| Smoking Initiation | rs12855717  | 13:101252635 | C | -0.0155 | 0.0026 | 0.43 | 1.2E-09 | 146 |
| Smoking Initiation | rs12878369  | 14:28346502  | C | -0.0174 | 0.0026 | 0.65 | 1.6E-11 | 170 |
| Smoking Initiation | rs12918191  | 16:50945156  | A | 0.0197  | 0.0030 | 0.80 | 3.1E-11 | 155 |
| Smoking Initiation | rs1291821   | 10:11133823  | A | -0.0145 | 0.0026 | 0.46 | 1.4E-08 | 128 |
| Smoking Initiation | rs13007361  | 2:166250244  | G | -0.0175 | 0.0031 | 0.85 | 2.3E-08 | 99  |
| Smoking Initiation | rs13066050  | 3:81325861   | C | -0.0188 | 0.0031 | 0.81 | 1.9E-09 | 137 |
| Smoking Initiation | rs13109980  | 4:140886963  | G | 0.0222  | 0.0027 | 0.68 | 3.4E-16 | 266 |
| Smoking Initiation | rs13110073  | 4:147797913  | T | 0.0246  | 0.0026 | 0.57 | 3.2E-21 | 366 |

|                    |             |              |   |         |        |      |         |     |
|--------------------|-------------|--------------|---|---------|--------|------|---------|-----|
| Smoking Initiation | rs13237637  | 7:3503207    | G | 0.0237  | 0.0025 | 0.49 | 1.5E-20 | 345 |
| Smoking Initiation | rs13261666  | 8:59814666   | G | 0.0200  | 0.0025 | 0.46 | 4.4E-15 | 245 |
| Smoking Initiation | rs13392222  | 2:100672408  | A | 0.0234  | 0.0037 | 0.83 | 1.9E-10 | 195 |
| Smoking Initiation | rs13437771  | 7:99071478   | A | 0.0271  | 0.0035 | 0.78 | 1.4E-14 | 308 |
| Smoking Initiation | rs1373178   | 18:49967811  | T | 0.0203  | 0.0026 | 0.39 | 4.2E-15 | 241 |
| Smoking Initiation | rs1381287   | 14:98597552  | C | -0.0180 | 0.0026 | 0.52 | 1.8E-12 | 200 |
| Smoking Initiation | rs1381775   | 11:42442826  | T | 0.0156  | 0.0028 | 0.28 | 2.8E-08 | 122 |
| Smoking Initiation | rs1385108   | 5:154839646  | C | -0.0187 | 0.0030 | 0.73 | 3.8E-10 | 170 |
| Smoking Initiation | rs13906     | 12:49952394  | C | 0.0245  | 0.0041 | 0.87 | 2.0E-09 | 165 |
| Smoking Initiation | rs1435479   | 4:94550450   | G | -0.0164 | 0.0028 | 0.70 | 5.7E-09 | 140 |
| Smoking Initiation | rs1435672   | 15:36399479  | T | -0.0141 | 0.0026 | 0.40 | 3.8E-08 | 118 |
| Smoking Initiation | rs1445649   | 2:155682556  | T | -0.0206 | 0.0026 | 0.49 | 8.5E-16 | 261 |
| Smoking Initiation | rs1449012   | 3:159048333  | C | 0.0154  | 0.0026 | 0.60 | 1.8E-09 | 139 |
| Smoking Initiation | rs147052174 | 1:179783167  | G | -0.0623 | 0.0098 | 0.99 | 2.3E-10 | 117 |
| Smoking Initiation | rs1514176   | 1:74991596   | G | 0.0193  | 0.0026 | 0.47 | 7.7E-14 | 229 |
| Smoking Initiation | rs1518393   | 2:58171220   | A | -0.0169 | 0.0026 | 0.41 | 1.3E-10 | 169 |
| Smoking Initiation | rs1549979   | 3:85460131   | C | 0.0245  | 0.0026 | 0.34 | 8.8E-21 | 335 |
| Smoking Initiation | rs160631    | 6:52895230   | T | 0.0173  | 0.0029 | 0.28 | 1.9E-09 | 149 |
| Smoking Initiation | rs1632941   | 6:29796685   | T | 0.0158  | 0.0026 | 0.64 | 6.7E-10 | 142 |
| Smoking Initiation | rs16826827  | 2:147825689  | T | 0.0222  | 0.0039 | 0.88 | 9.2E-09 | 129 |
| Smoking Initiation | rs16828799  | 3:173353739  | G | -0.0198 | 0.0035 | 0.84 | 1.8E-08 | 127 |
| Smoking Initiation | rs1713676   | 11:113660576 | A | 0.0167  | 0.0026 | 0.46 | 5.4E-11 | 171 |
| Smoking Initiation | rs1714521   | 3:158284861  | A | 0.0163  | 0.0026 | 0.57 | 3.1E-10 | 160 |
| Smoking Initiation | rs17165769  | 5:107365642  | A | -0.0159 | 0.0026 | 0.59 | 9.6E-10 | 151 |
| Smoking Initiation | rs17197663  | 13:38172867  | G | 0.0216  | 0.0039 | 0.90 | 2.1E-08 | 105 |
| Smoking Initiation | rs17229285  | 2:199523122  | C | 0.0155  | 0.0025 | 0.54 | 1.3E-09 | 147 |
| Smoking Initiation | rs1733760   | 10:56698174  | T | -0.0148 | 0.0025 | 0.54 | 6.7E-09 | 134 |
| Smoking Initiation | rs1737329   | 6:163807748  | C | -0.0170 | 0.0029 | 0.25 | 5.1E-09 | 133 |



|                    |            |              |   |         |        |      |         |     |
|--------------------|------------|--------------|---|---------|--------|------|---------|-----|
| Smoking Initiation | rs17554906 | 6:92226609   | G | -0.0142 | 0.0026 | 0.62 | 3.1E-08 | 117 |
| Smoking Initiation | rs1759433  | 9:128073097  | G | -0.0154 | 0.0026 | 0.50 | 1.7E-09 | 145 |
| Smoking Initiation | rs17616642 | 2:59022210   | A | 0.0166  | 0.0030 | 0.79 | 2.1E-08 | 110 |
| Smoking Initiation | rs17692129 | 17:44793283  | C | -0.0196 | 0.0027 | 0.58 | 4.6E-13 | 230 |
| Smoking Initiation | rs1772572  | 13:81191176  | C | 0.0169  | 0.0027 | 0.67 | 5.6E-10 | 155 |
| Smoking Initiation | rs1799068  | 7:97707069   | G | -0.0166 | 0.0026 | 0.60 | 2.6E-10 | 164 |
| Smoking Initiation | rs1811739  | 14:77529375  | G | -0.0183 | 0.0030 | 0.75 | 6.0E-10 | 155 |
| Smoking Initiation | rs1863161  | 2:60139524   | G | -0.0153 | 0.0026 | 0.38 | 2.3E-09 | 136 |
| Smoking Initiation | rs1889571  | 1:32195819   | T | -0.0222 | 0.0038 | 0.84 | 4.2E-09 | 166 |
| Smoking Initiation | rs1901477  | 2:104126983  | A | -0.0304 | 0.0026 | 0.51 | 2.1E-31 | 570 |
| Smoking Initiation | rs1927901  | 9:120519111  | T | 0.0142  | 0.0026 | 0.44 | 3.1E-08 | 122 |
| Smoking Initiation | rs1930371  | 9:81444104   | C | 0.0172  | 0.0030 | 0.78 | 7.1E-09 | 125 |
| Smoking Initiation | rs1931431  | 9:11161799   | G | -0.0182 | 0.0026 | 0.53 | 8.6E-13 | 204 |
| Smoking Initiation | rs1937443  | 1:66469643   | C | -0.0204 | 0.0026 | 0.42 | 1.8E-15 | 250 |
| Smoking Initiation | rs2010921  | 11:132098205 | G | -0.0174 | 0.0028 | 0.68 | 2.5E-10 | 163 |
| Smoking Initiation | rs2028269  | 5:79308315   | G | -0.0162 | 0.0026 | 0.63 | 5.2E-10 | 151 |
| Smoking Initiation | rs2063976  | 8:91096366   | C | 0.0202  | 0.0027 | 0.40 | 7.4E-14 | 241 |
| Smoking Initiation | rs2155646  | 11:112912811 | T | -0.0378 | 0.0026 | 0.45 | 9.4E-48 | 870 |
| Smoking Initiation | rs2173019  | 5:167614971  | T | -0.0282 | 0.0033 | 0.84 | 3.0E-17 | 267 |
| Smoking Initiation | rs221988   | 3:64234307   | A | 0.0149  | 0.0026 | 0.58 | 1.4E-08 | 133 |
| Smoking Initiation | rs2276825  | 3:52886605   | T | -0.0189 | 0.0030 | 0.74 | 1.9E-10 | 170 |
| Smoking Initiation | rs2279829  | 3:147106319  | C | 0.0174  | 0.0031 | 0.73 | 2.1E-08 | 145 |
| Smoking Initiation | rs2289791  | 15:67476952  | G | 0.0177  | 0.0030 | 0.77 | 2.0E-09 | 139 |
| Smoking Initiation | rs2306866  | 3:53766212   | A | 0.0167  | 0.0026 | 0.35 | 1.9E-10 | 156 |
| Smoking Initiation | rs2319545  | 3:147719648  | C | -0.0232 | 0.0036 | 0.84 | 8.3E-11 | 177 |
| Smoking Initiation | rs2344976  | 17:30685935  | T | 0.0151  | 0.0026 | 0.38 | 8.0E-09 | 132 |
| Smoking Initiation | rs2378662  | 9:86707289   | G | -0.0152 | 0.0026 | 0.44 | 2.7E-09 | 141 |
| Smoking Initiation | rs238896   | 11:113994505 | G | 0.0169  | 0.0025 | 0.52 | 3.7E-11 | 175 |

|                    |            |              |   |         |        |      |         |     |
|--------------------|------------|--------------|---|---------|--------|------|---------|-----|
| Smoking Initiation | rs2526390  | 3:50192760   | C | -0.0205 | 0.0027 | 0.73 | 3.6E-14 | 204 |
| Smoking Initiation | rs2539706  | 2:59819545   | G | -0.0162 | 0.0026 | 0.47 | 2.0E-10 | 162 |
| Smoking Initiation | rs2587507  | 17:77790135  | T | 0.0147  | 0.0025 | 0.49 | 8.7E-09 | 132 |
| Smoking Initiation | rs2637869  | 1:38757237   | G | -0.0182 | 0.0028 | 0.71 | 6.5E-11 | 169 |
| Smoking Initiation | rs2710634  | 2:32808804   | T | 0.0178  | 0.0026 | 0.48 | 3.4E-12 | 194 |
| Smoking Initiation | rs2734390  | 3:60459291   | A | -0.0148 | 0.0026 | 0.67 | 2.1E-08 | 119 |
| Smoking Initiation | rs2796793  | 10:36634124  | G | -0.0145 | 0.0026 | 0.56 | 1.6E-08 | 127 |
| Smoking Initiation | rs281296   | 15:47685010  | G | -0.0247 | 0.0027 | 0.66 | 1.6E-20 | 338 |
| Smoking Initiation | rs28408682 | 10:104403310 | A | -0.0167 | 0.0026 | 0.55 | 1.4E-10 | 170 |
| Smoking Initiation | rs28441558 | 17:7803118   | T | 0.0356  | 0.0055 | 0.94 | 1.2E-10 | 171 |
| Smoking Initiation | rs2901785  | 1:174104743  | G | 0.0173  | 0.0026 | 0.55 | 1.5E-11 | 183 |
| Smoking Initiation | rs290601   | 8:115374642  | C | -0.0163 | 0.0029 | 0.70 | 1.1E-08 | 138 |
| Smoking Initiation | rs2925128  | 14:98362355  | C | -0.0168 | 0.0027 | 0.56 | 3.7E-10 | 172 |
| Smoking Initiation | rs2939756  | 11:41436297  | G | 0.0157  | 0.0026 | 0.50 | 7.5E-10 | 152 |
| Smoking Initiation | rs2959084  | 11:46078656  | G | -0.0171 | 0.0028 | 0.34 | 9.8E-10 | 160 |
| Smoking Initiation | rs301807   | 1:8484823    | A | -0.0180 | 0.0026 | 0.39 | 2.5E-12 | 190 |
| Smoking Initiation | rs3115418  | 2:200936399  | T | 0.0142  | 0.0026 | 0.51 | 2.8E-08 | 125 |
| Smoking Initiation | rs3172494  | 3:48731487   | G | 0.0291  | 0.0040 | 0.81 | 3.4E-13 | 320 |
| Smoking Initiation | rs3218116  | 6:41901763   | C | 0.0198  | 0.0029 | 0.76 | 1.0E-11 | 175 |
| Smoking Initiation | rs329124   | 5:133865452  | A | 0.0164  | 0.0026 | 0.58 | 2.0E-10 | 162 |
| Smoking Initiation | rs34342129 | 18:5872472   | T | 0.0143  | 0.0025 | 0.53 | 2.1E-08 | 125 |
| Smoking Initiation | rs34399632 | 2:137571174  | A | -0.0194 | 0.0030 | 0.78 | 1.5E-10 | 158 |
| Smoking Initiation | rs34553878 | 9:134334588  | A | -0.0247 | 0.0041 | 0.91 | 1.2E-09 | 122 |
| Smoking Initiation | rs34940743 | 14:80102233  | A | -0.0159 | 0.0027 | 0.66 | 2.8E-09 | 140 |
| Smoking Initiation | rs35375873 | 5:43190647   | G | 0.0270  | 0.0041 | 0.84 | 3.3E-11 | 236 |
| Smoking Initiation | rs35656245 | 1:190957480  | G | -0.0159 | 0.0029 | 0.74 | 2.2E-08 | 122 |
| Smoking Initiation | rs357304   | 2:164862639  | T | -0.0167 | 0.0029 | 0.28 | 5.4E-09 | 137 |
| Smoking Initiation | rs359247   | 2:60477052   | A | -0.0220 | 0.0027 | 0.35 | 9.9E-17 | 273 |

|                    |            |              |   |         |        |      |         |     |
|--------------------|------------|--------------|---|---------|--------|------|---------|-----|
| Smoking Initiation | rs359431   | 5:173288534  | C | 0.0142  | 0.0026 | 0.46 | 3.2E-08 | 123 |
| Smoking Initiation | rs3740977  | 11:46393574  | T | -0.0195 | 0.0034 | 0.86 | 1.2E-08 | 112 |
| Smoking Initiation | rs3800227  | 6:108994161  | A | -0.0172 | 0.0029 | 0.32 | 3.6E-09 | 157 |
| Smoking Initiation | rs3810496  | 20:62406886  | T | -0.0159 | 0.0026 | 0.39 | 1.5E-09 | 148 |
| Smoking Initiation | rs3811038  | 2:113240183  | T | -0.0191 | 0.0028 | 0.76 | 1.6E-11 | 165 |
| Smoking Initiation | rs3820277  | 1:18436657   | G | 0.0188  | 0.0026 | 0.47 | 1.6E-13 | 218 |
| Smoking Initiation | rs3843905  | 5:165427280  | C | 0.0151  | 0.0026 | 0.57 | 5.4E-09 | 138 |
| Smoking Initiation | rs3847244  | 9:3025368    | C | -0.0187 | 0.0026 | 0.59 | 2.6E-13 | 208 |
| Smoking Initiation | rs3850736  | 8:64912021   | C | -0.0191 | 0.0026 | 0.48 | 6.4E-14 | 225 |
| Smoking Initiation | rs3909281  | 5:165096435  | T | -0.0211 | 0.0026 | 0.53 | 1.6E-16 | 273 |
| Smoking Initiation | rs3934797  | 4:112467612  | G | 0.0213  | 0.0033 | 0.84 | 1.1E-10 | 151 |
| Smoking Initiation | rs4044321  | 5:166989513  | A | 0.0226  | 0.0027 | 0.35 | 1.8E-17 | 288 |
| Smoking Initiation | rs4140932  | 4:15458598   | T | 0.0140  | 0.0026 | 0.53 | 4.9E-08 | 121 |
| Smoking Initiation | rs42417    | 5:94198290   | C | -0.0169 | 0.0028 | 0.43 | 8.3E-10 | 173 |
| Smoking Initiation | rs4264267  | 13:38359676  | C | -0.0148 | 0.0026 | 0.45 | 6.8E-09 | 133 |
| Smoking Initiation | rs4310804  | 15:96858409  | C | 0.0182  | 0.0030 | 0.71 | 7.5E-10 | 167 |
| Smoking Initiation | rs4326350  | 8:10763655   | C | 0.0176  | 0.0026 | 0.59 | 5.2E-12 | 186 |
| Smoking Initiation | rs4476253  | 18:25253297  | G | 0.0185  | 0.0030 | 0.77 | 5.8E-10 | 149 |
| Smoking Initiation | rs4543050  | 3:74954560   | A | -0.0222 | 0.0033 | 0.17 | 1.5E-11 | 168 |
| Smoking Initiation | rs45444697 | 1:155034632  | C | -0.0197 | 0.0031 | 0.82 | 2.7E-10 | 141 |
| Smoking Initiation | rs4674916  | 2:225365635  | C | 0.0180  | 0.0027 | 0.69 | 3.1E-11 | 171 |
| Smoking Initiation | rs4674993  | 2:226332033  | A | 0.0240  | 0.0032 | 0.80 | 4.9E-14 | 229 |
| Smoking Initiation | rs4727189  | 7:88442568   | T | -0.0149 | 0.0027 | 0.66 | 3.0E-08 | 123 |
| Smoking Initiation | rs4752018  | 10:118678712 | C | -0.0189 | 0.0030 | 0.79 | 4.4E-10 | 146 |
| Smoking Initiation | rs4759229  | 12:56474480  | A | -0.0156 | 0.0027 | 0.33 | 6.5E-09 | 132 |
| Smoking Initiation | rs4785187  | 16:49766772  | G | -0.0200 | 0.0031 | 0.72 | 6.6E-11 | 198 |
| Smoking Initiation | rs4788676  | 16:72950468  | T | 0.0177  | 0.0030 | 0.83 | 4.9E-09 | 107 |
| Smoking Initiation | rs4790874  | 17:1995177   | C | -0.0174 | 0.0026 | 0.49 | 8.4E-12 | 187 |

|                    |            |              |   |         |        |      |         |     |
|--------------------|------------|--------------|---|---------|--------|------|---------|-----|
| Smoking Initiation | rs4818005  | 21:40588819  | G | 0.0204  | 0.0026 | 0.36 | 1.1E-14 | 236 |
| Smoking Initiation | rs4822102  | 22:42698430  | C | 0.0165  | 0.0026 | 0.46 | 2.8E-10 | 167 |
| Smoking Initiation | rs4837631  | 9:122061948  | C | 0.0154  | 0.0026 | 0.56 | 2.0E-09 | 143 |
| Smoking Initiation | rs4877285  | 9:81354129   | G | 0.0181  | 0.0027 | 0.35 | 2.1E-11 | 184 |
| Smoking Initiation | rs4886207  | 13:60705792  | T | 0.0162  | 0.0026 | 0.42 | 8.8E-10 | 158 |
| Smoking Initiation | rs4912332  | 1:58815243   | C | -0.0141 | 0.0025 | 0.47 | 2.9E-08 | 123 |
| Smoking Initiation | rs540860   | 11:121530888 | A | -0.0176 | 0.0026 | 0.45 | 5.8E-12 | 189 |
| Smoking Initiation | rs55786907 | 13:59871584  | A | -0.0194 | 0.0035 | 0.82 | 1.8E-08 | 138 |
| Smoking Initiation | rs55913542 | 14:99693843  | G | -0.0186 | 0.0034 | 0.82 | 3.3E-08 | 124 |
| Smoking Initiation | rs55944129 | 4:29082156   | T | 0.0176  | 0.0029 | 0.70 | 1.1E-09 | 159 |
| Smoking Initiation | rs56208390 | 2:83247997   | A | -0.0216 | 0.0039 | 0.86 | 2.7E-08 | 134 |
| Smoking Initiation | rs56902655 | 15:63898709  | T | 0.0219  | 0.0037 | 0.85 | 4.1E-09 | 154 |
| Smoking Initiation | rs58400863 | 4:31184484   | G | 0.0202  | 0.0027 | 0.66 | 4.9E-14 | 226 |
| Smoking Initiation | rs586699   | 11:92289734  | G | 0.0148  | 0.0026 | 0.43 | 7.3E-09 | 132 |
| Smoking Initiation | rs59537158 | 4:28246049   | C | -0.0225 | 0.0031 | 0.82 | 4.6E-13 | 184 |
| Smoking Initiation | rs6011779  | 20:61984317  | C | 0.0192  | 0.0032 | 0.24 | 2.8E-09 | 166 |
| Smoking Initiation | rs6050446  | 20:25195509  | A | -0.0544 | 0.0076 | 0.03 | 8.8E-13 | 222 |
| Smoking Initiation | rs6073075  | 20:42015801  | T | 0.0187  | 0.0034 | 0.17 | 2.4E-08 | 121 |
| Smoking Initiation | rs60833441 | 15:74048768  | A | 0.0143  | 0.0026 | 0.53 | 2.3E-08 | 125 |
| Smoking Initiation | rs61533748 | 2:22582968   | T | -0.0174 | 0.0026 | 0.58 | 2.8E-11 | 183 |
| Smoking Initiation | rs61884449 | 11:64485193  | C | -0.0200 | 0.0036 | 0.80 | 2.3E-08 | 154 |
| Smoking Initiation | rs61886926 | 11:64133552  | C | 0.0179  | 0.0026 | 0.60 | 7.3E-12 | 190 |
| Smoking Initiation | rs619087   | 6:94175279   | A | -0.0143 | 0.0026 | 0.51 | 3.1E-08 | 125 |
| Smoking Initiation | rs61959481 | 13:55834929  | G | 0.0203  | 0.0031 | 0.81 | 7.9E-11 | 154 |
| Smoking Initiation | rs62007780 | 15:78025464  | G | 0.0159  | 0.0026 | 0.61 | 7.5E-10 | 149 |
| Smoking Initiation | rs62052916 | 16:72574550  | A | 0.0319  | 0.0050 | 0.92 | 1.6E-10 | 191 |
| Smoking Initiation | rs62098013 | 18:50863861  | G | -0.0177 | 0.0026 | 0.66 | 2.2E-11 | 174 |
| Smoking Initiation | rs62106258 | 2:417167     | T | 0.0455  | 0.0060 | 0.97 | 3.3E-14 | 127 |

|                    |            |             |   |         |        |      |         |     |
|--------------------|------------|-------------|---|---------|--------|------|---------|-----|
| Smoking Initiation | rs62137126 | 2:44250149  | A | 0.0237  | 0.0039 | 0.89 | 1.3E-09 | 139 |
| Smoking Initiation | rs62180324 | 2:63416606  | G | 0.0195  | 0.0031 | 0.83 | 3.9E-10 | 131 |
| Smoking Initiation | rs62193862 | 2:202843875 | G | -0.0238 | 0.0042 | 0.88 | 2.0E-08 | 146 |
| Smoking Initiation | rs62246017 | 3:71483084  | G | 0.0162  | 0.0027 | 0.72 | 3.0E-09 | 131 |
| Smoking Initiation | rs62340589 | 4:176875795 | G | -0.0174 | 0.0032 | 0.81 | 4.3E-08 | 117 |
| Smoking Initiation | rs62618693 | 11:32956492 | C | 0.0353  | 0.0063 | 0.97 | 2.1E-08 | 85  |
| Smoking Initiation | rs6265     | 11:27679916 | C | 0.0293  | 0.0033 | 0.83 | 2.8E-19 | 304 |
| Smoking Initiation | rs6437769  | 3:107997514 | C | -0.0142 | 0.0026 | 0.48 | 3.7E-08 | 124 |
| Smoking Initiation | rs6438436  | 3:117822149 | C | -0.0247 | 0.0033 | 0.24 | 5.3E-14 | 271 |
| Smoking Initiation | rs644740   | 11:65561468 | C | 0.0141  | 0.0026 | 0.58 | 3.7E-08 | 119 |
| Smoking Initiation | rs6452785  | 5:87685500  | C | 0.0269  | 0.0026 | 0.51 | 4.7E-26 | 445 |
| Smoking Initiation | rs6497840  | 16:25351633 | G | -0.0228 | 0.0029 | 0.30 | 2.0E-15 | 270 |
| Smoking Initiation | rs6568832  | 6:97702876  | G | -0.0189 | 0.0030 | 0.28 | 1.7E-10 | 179 |
| Smoking Initiation | rs67050670 | 18:39297254 | A | 0.0203  | 0.0030 | 0.78 | 2.3E-11 | 171 |
| Smoking Initiation | rs6731872  | 2:624205    | T | -0.0316 | 0.0034 | 0.18 | 5.4E-21 | 363 |
| Smoking Initiation | rs6750107  | 2:80748807  | G | -0.0146 | 0.0026 | 0.58 | 2.6E-08 | 128 |
| Smoking Initiation | rs6750529  | 2:182027603 | C | -0.0199 | 0.0029 | 0.26 | 9.3E-12 | 188 |
| Smoking Initiation | rs6756212  | 2:146140132 | C | 0.0339  | 0.0026 | 0.52 | 3.5E-40 | 706 |
| Smoking Initiation | rs67777803 | 17:27323322 | G | 0.0246  | 0.0034 | 0.82 | 3.2E-13 | 220 |
| Smoking Initiation | rs6782116  | 3:77176032  | C | 0.0147  | 0.0026 | 0.66 | 1.5E-08 | 118 |
| Smoking Initiation | rs6874731  | 5:80263865  | T | -0.0153 | 0.0025 | 0.54 | 1.8E-09 | 144 |
| Smoking Initiation | rs6890961  | 5:166778503 | C | 0.0193  | 0.0026 | 0.37 | 2.1E-13 | 214 |
| Smoking Initiation | rs6936160  | 6:100347745 | C | -0.0201 | 0.0028 | 0.31 | 4.2E-13 | 214 |
| Smoking Initiation | rs6948707  | 7:1870794   | T | -0.0243 | 0.0026 | 0.60 | 4.2E-21 | 351 |
| Smoking Initiation | rs6968380  | 7:114940159 | G | 0.0234  | 0.0027 | 0.36 | 1.1E-17 | 311 |
| Smoking Initiation | rs6986430  | 8:93048104  | T | 0.0243  | 0.0031 | 0.80 | 2.0E-15 | 235 |
| Smoking Initiation | rs7024924  | 9:8282399   | T | -0.0189 | 0.0034 | 0.81 | 1.9E-08 | 137 |
| Smoking Initiation | rs7026534  | 9:134907263 | T | 0.0166  | 0.0028 | 0.29 | 2.7E-09 | 140 |

|                    |            |              |   |         |        |      |         |     |
|--------------------|------------|--------------|---|---------|--------|------|---------|-----|
| Smoking Initiation | rs7072776  | 10:22032942  | A | 0.0220  | 0.0028 | 0.26 | 5.7E-15 | 231 |
| Smoking Initiation | rs7134009  | 12:75263193  | T | 0.0158  | 0.0029 | 0.67 | 4.3E-08 | 137 |
| Smoking Initiation | rs71367544 | 18:77574374  | C | -0.0206 | 0.0032 | 0.79 | 8.5E-11 | 171 |
| Smoking Initiation | rs71592686 | 5:60121271   | T | -0.0207 | 0.0029 | 0.73 | 3.8E-13 | 209 |
| Smoking Initiation | rs71602617 | 4:136406155  | C | 0.0178  | 0.0032 | 0.73 | 2.1E-08 | 153 |
| Smoking Initiation | rs7188873  | 16:24727064  | A | -0.0203 | 0.0026 | 0.37 | 8.5E-15 | 238 |
| Smoking Initiation | rs7192140  | 16:10173748  | T | 0.0169  | 0.0025 | 0.54 | 3.4E-11 | 175 |
| Smoking Initiation | rs72780746 | 5:103929588  | T | 0.0258  | 0.0034 | 0.84 | 2.1E-14 | 217 |
| Smoking Initiation | rs72789626 | 5:106825618  | T | 0.0256  | 0.0037 | 0.90 | 5.1E-12 | 147 |
| Smoking Initiation | rs72790288 | 2:29513404   | G | 0.0455  | 0.0077 | 0.98 | 3.3E-09 | 108 |
| Smoking Initiation | rs72898831 | 18:42658643  | A | 0.0244  | 0.0035 | 0.86 | 4.1E-12 | 178 |
| Smoking Initiation | rs72938304 | 18:53661743  | G | 0.0272  | 0.0040 | 0.89 | 1.4E-11 | 175 |
| Smoking Initiation | rs73008357 | 6:156431856  | A | 0.0223  | 0.0040 | 0.89 | 2.4E-08 | 120 |
| Smoking Initiation | rs7333559  | 13:100546450 | G | 0.0232  | 0.0031 | 0.20 | 5.9E-14 | 216 |
| Smoking Initiation | rs73831818 | 3:55988394   | A | -0.0320 | 0.0055 | 0.95 | 5.5E-09 | 127 |
| Smoking Initiation | rs748832   | 3:16851202   | A | -0.0172 | 0.0026 | 0.64 | 6.6E-11 | 168 |
| Smoking Initiation | rs7505855  | 18:31696075  | C | 0.0170  | 0.0026 | 0.43 | 5.3E-11 | 174 |
| Smoking Initiation | rs75674569 | 13:96823724  | G | 0.0253  | 0.0043 | 0.93 | 2.6E-09 | 106 |
| Smoking Initiation | rs75919030 | 17:50193197  | T | 0.0210  | 0.0029 | 0.73 | 3.3E-13 | 214 |
| Smoking Initiation | rs7598402  | 2:50735943   | C | 0.0147  | 0.0025 | 0.49 | 7.4E-09 | 134 |
| Smoking Initiation | rs7600835  | 2:172521827  | G | 0.0151  | 0.0027 | 0.71 | 1.8E-08 | 116 |
| Smoking Initiation | rs7631379  | 3:181409057  | T | -0.0208 | 0.0032 | 0.83 | 3.9E-11 | 151 |
| Smoking Initiation | rs7640107  | 3:59966156   | C | 0.0142  | 0.0026 | 0.55 | 3.5E-08 | 123 |
| Smoking Initiation | rs76460663 | 11:111979741 | C | 0.0423  | 0.0064 | 0.93 | 4.1E-11 | 289 |
| Smoking Initiation | rs7657022  | 4:35501032   | A | -0.0183 | 0.0025 | 0.50 | 7.3E-13 | 206 |
| Smoking Initiation | rs76608582 | 19:4474725   | C | 0.0345  | 0.0059 | 0.94 | 4.9E-09 | 153 |
| Smoking Initiation | rs76841737 | 7:91281409   | C | 0.0231  | 0.0042 | 0.89 | 3.3E-08 | 126 |
| Smoking Initiation | rs7696257  | 4:137474783  | G | -0.0153 | 0.0026 | 0.58 | 6.8E-09 | 141 |

|                    |            |              |   |         |        |      |         |     |
|--------------------|------------|--------------|---|---------|--------|------|---------|-----|
| Smoking Initiation | rs77215829 | 12:112618346 | A | 0.0240  | 0.0038 | 0.86 | 2.0E-10 | 172 |
| Smoking Initiation | rs77283305 | 7:132593831  | G | 0.0152  | 0.0028 | 0.71 | 3.9E-08 | 117 |
| Smoking Initiation | rs7743165  | 6:67521222   | T | -0.0193 | 0.0025 | 0.54 | 4.2E-14 | 227 |
| Smoking Initiation | rs7802996  | 7:77771983   | C | 0.0209  | 0.0034 | 0.88 | 1.1E-09 | 112 |
| Smoking Initiation | rs7809303  | 7:69484366   | G | 0.0214  | 0.0027 | 0.66 | 3.5E-15 | 252 |
| Smoking Initiation | rs7836565  | 8:52569449   | C | 0.0155  | 0.0028 | 0.30 | 4.4E-08 | 125 |
| Smoking Initiation | rs7867822  | 9:20676454   | A | 0.0151  | 0.0027 | 0.31 | 2.8E-08 | 121 |
| Smoking Initiation | rs7920501  | 10:10043159  | T | 0.0155  | 0.0026 | 0.59 | 1.3E-09 | 144 |
| Smoking Initiation | rs7921378  | 10:63674885  | G | 0.0233  | 0.0025 | 0.52 | 6.1E-20 | 334 |
| Smoking Initiation | rs7929518  | 11:85980958  | A | -0.0192 | 0.0030 | 0.26 | 2.6E-10 | 176 |
| Smoking Initiation | rs7943721  | 11:73309393  | G | 0.0212  | 0.0034 | 0.16 | 3.6E-10 | 151 |
| Smoking Initiation | rs7969559  | 12:69655167  | A | 0.0170  | 0.0028 | 0.34 | 1.5E-09 | 159 |
| Smoking Initiation | rs8005334  | 14:79563654  | T | -0.0167 | 0.0027 | 0.72 | 3.4E-10 | 138 |
| Smoking Initiation | rs8027457  | 15:99204101  | T | -0.0153 | 0.0025 | 0.48 | 1.9E-09 | 144 |
| Smoking Initiation | rs8050598  | 16:49891964  | C | -0.0187 | 0.0029 | 0.77 | 1.8E-10 | 154 |
| Smoking Initiation | rs8096225  | 18:36921851  | A | -0.0155 | 0.0028 | 0.27 | 2.6E-08 | 116 |
| Smoking Initiation | rs8103660  | 19:18566395  | T | -0.0158 | 0.0027 | 0.62 | 3.0E-09 | 146 |
| Smoking Initiation | rs876793   | 1:237852083  | T | 0.0179  | 0.0027 | 0.71 | 5.7E-11 | 164 |
| Smoking Initiation | rs910912   | 20:54462393  | T | 0.0168  | 0.0029 | 0.26 | 7.8E-09 | 134 |
| Smoking Initiation | rs925524   | 1:46496709   | A | -0.0156 | 0.0028 | 0.28 | 2.9E-08 | 121 |
| Smoking Initiation | rs9288999  | 3:114147927  | G | -0.0174 | 0.0029 | 0.30 | 1.5E-09 | 158 |
| Smoking Initiation | rs9302604  | 16:69576894  | A | -0.0187 | 0.0026 | 0.56 | 3.3E-13 | 212 |
| Smoking Initiation | rs9323328  | 14:58653514  | A | 0.0142  | 0.0026 | 0.52 | 2.6E-08 | 125 |
| Smoking Initiation | rs9331343  | 6:157738258  | T | 0.0141  | 0.0026 | 0.43 | 3.9E-08 | 120 |
| Smoking Initiation | rs9423279  | 10:125680419 | C | 0.0186  | 0.0027 | 0.40 | 3.1E-12 | 204 |
| Smoking Initiation | rs951740   | 1:44011737   | G | -0.0295 | 0.0026 | 0.38 | 3.8E-29 | 508 |
| Smoking Initiation | rs9538162  | 13:59265043  | T | -0.0174 | 0.0026 | 0.59 | 1.8E-11 | 180 |
| Smoking Initiation | rs9540731  | 13:66949370  | C | 0.0177  | 0.0025 | 0.53 | 3.4E-12 | 193 |

|                    |             |             |   |         |        |      |         |     |
|--------------------|-------------|-------------|---|---------|--------|------|---------|-----|
| Smoking Initiation | rs9545155   | 13:80191873 | T | 0.0161  | 0.0026 | 0.53 | 3.0E-10 | 159 |
| Smoking Initiation | rs9627272   | 22:46442288 | G | 0.0155  | 0.0026 | 0.64 | 2.4E-09 | 136 |
| Smoking Initiation | rs9826984   | 3:131945722 | G | 0.0141  | 0.0026 | 0.49 | 3.9E-08 | 122 |
| Smoking Initiation | rs9841807   | 3:175718927 | C | -0.0163 | 0.0029 | 0.68 | 1.4E-08 | 141 |
| Smoking Initiation | rs9850597   | 3:161761866 | G | 0.0186  | 0.0033 | 0.23 | 1.6E-08 | 150 |
| Smoking Initiation | rs986714    | 5:50821338  | A | 0.0160  | 0.0026 | 0.58 | 4.1E-10 | 155 |
| Smoking Initiation | rs9922607   | 16:17570220 | C | 0.0222  | 0.0032 | 0.87 | 3.4E-12 | 139 |
| Smoking Initiation | rs9941217   | 16:18050926 | C | 0.0186  | 0.0027 | 0.67 | 3.5E-12 | 188 |
| Smoking Initiation | rs9987376   | 8:93190014  | T | 0.0205  | 0.0026 | 0.38 | 2.0E-15 | 242 |
| Smoking Index      | rs10052591  | 5:50812738  | T | 0.0120  | 0.0020 | 0.59 | 2.1E-09 | 32  |
| Smoking Index      | rs10226228  | 7:32315613  | A | -0.0160 | 0.0020 | 0.68 | 2.0E-15 | 52  |
| Smoking Index      | rs10282292  | 7:111092478 | C | 0.0130  | 0.0020 | 0.38 | 5.9E-10 | 37  |
| Smoking Index      | rs1050847   | 16:87443734 | C | 0.0110  | 0.0020 | 0.50 | 1.4E-08 | 28  |
| Smoking Index      | rs10823968  | 10:74738269 | A | 0.0120  | 0.0020 | 0.52 | 2.1E-08 | 33  |
| Smoking Index      | rs10879871  | 12:75380511 | T | -0.0140 | 0.0020 | 0.37 | 5.0E-11 | 42  |
| Smoking Index      | rs10918701  | 1:162090536 | G | 0.0120  | 0.0020 | 0.40 | 2.1E-08 | 32  |
| Smoking Index      | rs10922907  | 1:91193049  | A | 0.0150  | 0.0020 | 0.55 | 3.0E-13 | 51  |
| Smoking Index      | rs11210229  | 1:73860028  | A | 0.0170  | 0.0020 | 0.39 | 2.0E-16 | 64  |
| Smoking Index      | rs112282219 | 11:46632809 | G | -0.0330 | 0.0050 | 0.97 | 3.8E-11 | 31  |
| Smoking Index      | rs11255908  | 10:8802912  | T | -0.0150 | 0.0020 | 0.77 | 2.3E-10 | 37  |
| Smoking Index      | rs113382419 | 9:136463019 | C | -0.0410 | 0.0030 | 0.94 | 3.0E-37 | 87  |
| Smoking Index      | rs11768481  | 7:96629103  | C | 0.0130  | 0.0020 | 0.60 | 9.9E-10 | 38  |
| Smoking Index      | rs11783093  | 8:27425349  | C | 0.0230  | 0.0030 | 0.87 | 1.2E-16 | 56  |
| Smoking Index      | rs11861214  | 16:746611   | G | 0.0140  | 0.0020 | 0.68 | 2.0E-08 | 39  |
| Smoking Index      | rs1193237   | 1:7526486   | G | -0.0110 | 0.0020 | 0.51 | 2.8E-08 | 28  |
| Smoking Index      | rs11948770  | 5:13246336  | T | -0.0150 | 0.0020 | 0.75 | 4.9E-10 | 39  |
| Smoking Index      | rs12202536  | 6:67475273  | A | -0.0120 | 0.0020 | 0.55 | 2.8E-09 | 33  |
| Smoking Index      | rs1221148   | 9:122046875 | C | 0.0130  | 0.0020 | 0.60 | 7.3E-11 | 38  |



|               |             |              |   |         |        |      |         |    |
|---------------|-------------|--------------|---|---------|--------|------|---------|----|
| Smoking Index | rs12244388  | 10:104640052 | G | -0.0190 | 0.0020 | 0.62 | 1.4E-19 | 79 |
| Smoking Index | rs1246265   | 9:86761745   | T | -0.0130 | 0.0020 | 0.30 | 4.2E-09 | 33 |
| Smoking Index | rs12481282  | 20:44761377  | G | 0.0160  | 0.0030 | 0.73 | 7.8E-09 | 47 |
| Smoking Index | rs12623702  | 2:202885506  | A | -0.0140 | 0.0020 | 0.57 | 7.7E-12 | 45 |
| Smoking Index | rs12708665  | 16:24728227  | A | -0.0220 | 0.0040 | 0.28 | 3.5E-09 | 91 |
| Smoking Index | rs12831617  | 12:84758368  | C | -0.0130 | 0.0020 | 0.82 | 1.9E-08 | 24 |
| Smoking Index | rs12967855  | 18:35138245  | A | 0.0120  | 0.0020 | 0.31 | 3.1E-08 | 29 |
| Smoking Index | rs13009008  | 2:174043233  | A | 0.0120  | 0.0020 | 0.38 | 4.6E-09 | 31 |
| Smoking Index | rs13016665  | 2:57995348   | C | -0.0130 | 0.0020 | 0.54 | 1.8E-09 | 39 |
| Smoking Index | rs13153393  | 5:167604213  | A | -0.0200 | 0.0030 | 0.90 | 2.5E-10 | 33 |
| Smoking Index | rs13296519  | 9:128471924  | G | -0.0140 | 0.0020 | 0.63 | 8.1E-12 | 42 |
| Smoking Index | rs136233    | 22:31212410  | A | -0.0140 | 0.0030 | 0.82 | 1.8E-08 | 26 |
| Smoking Index | rs147412694 | 21:40702786  | G | -0.0170 | 0.0030 | 0.87 | 2.9E-09 | 31 |
| Smoking Index | rs17309874  | 11:27667236  | G | -0.0160 | 0.0020 | 0.74 | 9.7E-13 | 45 |
| Smoking Index | rs17553262  | 10:92912773  | A | -0.0180 | 0.0030 | 0.92 | 5.3E-09 | 22 |
| Smoking Index | rs17576594  | 4:147952241  | G | 0.0160  | 0.0020 | 0.72 | 1.7E-12 | 48 |
| Smoking Index | rs1922018   | 7:3560401    | C | 0.0140  | 0.0020 | 0.33 | 3.0E-12 | 40 |
| Smoking Index | rs1931263   | 1:96175101   | G | -0.0110 | 0.0020 | 0.57 | 4.0E-08 | 27 |
| Smoking Index | rs1933270   | 1:49977965   | T | 0.0130  | 0.0020 | 0.41 | 1.5E-10 | 38 |
| Smoking Index | rs202645    | 22:41798520  | A | -0.0150 | 0.0020 | 0.24 | 3.9E-09 | 38 |
| Smoking Index | rs2062882   | 8:91839576   | G | -0.0120 | 0.0020 | 0.56 | 1.1E-08 | 33 |
| Smoking Index | rs2080870   | 5:60388313   | A | 0.0120  | 0.0020 | 0.24 | 4.9E-08 | 25 |
| Smoking Index | rs2254710   | 6:37477000   | C | 0.0130  | 0.0020 | 0.31 | 3.5E-08 | 34 |
| Smoking Index | rs2401924   | 7:115057862  | G | 0.0150  | 0.0020 | 0.55 | 2.7E-14 | 52 |
| Smoking Index | rs245774    | 5:170530930  | A | -0.0130 | 0.0020 | 0.31 | 7.4E-09 | 33 |
| Smoking Index | rs2675638   | 10:63576286  | G | 0.0120  | 0.0020 | 0.60 | 1.3E-09 | 32 |
| Smoking Index | rs2678670   | 2:104469564  | A | 0.0130  | 0.0020 | 0.47 | 3.1E-10 | 39 |
| Smoking Index | rs2838834   | 21:46665208  | C | -0.0130 | 0.0020 | 0.72 | 6.3E-10 | 32 |

|               |            |              |   |         |        |      |         |    |
|---------------|------------|--------------|---|---------|--------|------|---------|----|
| Smoking Index | rs28485305 | 15:74044197  | C | -0.0120 | 0.0020 | 0.61 | 2.6E-08 | 32 |
| Smoking Index | rs2867112  | 2:651349     | T | 0.0210  | 0.0030 | 0.84 | 4.8E-15 | 56 |
| Smoking Index | rs2890772  | 2:146175106  | G | -0.0200 | 0.0020 | 0.33 | 2.1E-22 | 82 |
| Smoking Index | rs2894808  | 6:52861990   | T | -0.0130 | 0.0020 | 0.92 | 3.5E-09 | 12 |
| Smoking Index | rs317021   | 4:35418368   | T | -0.0170 | 0.0030 | 0.82 | 1.1E-10 | 40 |
| Smoking Index | rs326341   | 3:107811142  | G | 0.0140  | 0.0020 | 0.56 | 1.2E-11 | 45 |
| Smoking Index | rs329120   | 5:133861756  | C | 0.0140  | 0.0020 | 0.58 | 6.3E-12 | 44 |
| Smoking Index | rs34866095 | 11:16377356  | A | -0.0120 | 0.0020 | 0.73 | 1.2E-08 | 26 |
| Smoking Index | rs348809   | 20:59032097  | A | -0.0120 | 0.0020 | 0.33 | 1.3E-08 | 29 |
| Smoking Index | rs35169606 | 8:9604066    | T | -0.0130 | 0.0020 | 0.65 | 1.2E-09 | 36 |
| Smoking Index | rs35175834 | 15:47680815  | G | -0.0240 | 0.0020 | 0.79 | 4.6E-22 | 89 |
| Smoking Index | rs35343344 | 19:18471610  | C | 0.0130  | 0.0020 | 0.74 | 8.8E-09 | 30 |
| Smoking Index | rs359243   | 2:60475509   | T | -0.0130 | 0.0020 | 0.38 | 9.5E-10 | 37 |
| Smoking Index | rs369230   | 16:89645437  | G | -0.0120 | 0.0020 | 0.34 | 1.8E-09 | 30 |
| Smoking Index | rs3742365  | 14:104198251 | T | -0.0160 | 0.0020 | 0.58 | 2.5E-14 | 58 |
| Smoking Index | rs3769949  | 2:166199284  | T | -0.0130 | 0.0020 | 0.65 | 2.5E-09 | 36 |
| Smoking Index | rs3811038  | 2:113240183  | T | -0.0140 | 0.0020 | 0.76 | 8.9E-10 | 33 |
| Smoking Index | rs3896224  | 10:106467853 | A | -0.0140 | 0.0020 | 0.53 | 1.1E-11 | 45 |
| Smoking Index | rs421983   | 3:84892866   | T | 0.0130  | 0.0020 | 0.47 | 3.3E-10 | 39 |
| Smoking Index | rs4391802  | 11:28674592  | A | 0.0150  | 0.0020 | 0.73 | 1.4E-11 | 41 |
| Smoking Index | rs4473348  | 2:182073742  | A | -0.0150 | 0.0020 | 0.24 | 6.4E-11 | 38 |
| Smoking Index | rs4543592  | 9:3014254    | T | -0.0120 | 0.0020 | 0.59 | 4.5E-10 | 32 |
| Smoking Index | rs4571506  | 5:87756918   | C | -0.0160 | 0.0030 | 0.53 | 1.5E-08 | 59 |
| Smoking Index | rs4671357  | 2:60136176   | T | 0.0140  | 0.0020 | 0.44 | 1.1E-11 | 45 |
| Smoking Index | rs4731925  | 7:132664757  | C | 0.0120  | 0.0020 | 0.30 | 2.6E-08 | 28 |
| Smoking Index | rs4814873  | 20:19616429  | C | 0.0140  | 0.0020 | 0.76 | 2.9E-09 | 33 |
| Smoking Index | rs4949465  | 1:32178489   | T | -0.0170 | 0.0030 | 0.83 | 1.7E-08 | 38 |
| Smoking Index | rs4957528  | 5:106420589  | A | -0.0150 | 0.0020 | 0.17 | 4.2E-09 | 29 |

|               |            |              |   |         |        |      |         |     |
|---------------|------------|--------------|---|---------|--------|------|---------|-----|
| Smoking Index | rs549845   | 1:44076469   | G | 0.0160  | 0.0020 | 0.30 | 8.3E-14 | 50  |
| Smoking Index | rs57611503 | 16:31165795  | G | 0.0110  | 0.0020 | 0.51 | 4.0E-08 | 28  |
| Smoking Index | rs6011779  | 20:61984317  | C | 0.0280  | 0.0030 | 0.24 | 2.3E-27 | 133 |
| Smoking Index | rs60952428 | 16:75640521  | T | 0.0190  | 0.0030 | 0.88 | 3.0E-08 | 35  |
| Smoking Index | rs6119897  | 20:31145415  | G | -0.0180 | 0.0020 | 0.69 | 3.6E-15 | 64  |
| Smoking Index | rs61796681 | 4:23678196   | A | -0.0190 | 0.0040 | 0.91 | 4.2E-08 | 27  |
| Smoking Index | rs62098013 | 18:50863861  | G | -0.0120 | 0.0020 | 0.66 | 4.1E-09 | 30  |
| Smoking Index | rs62135536 | 2:44326028   | C | 0.0350  | 0.0060 | 0.96 | 8.0E-10 | 42  |
| Smoking Index | rs62155874 | 2:105973094  | A | -0.0240 | 0.0030 | 0.89 | 5.2E-16 | 52  |
| Smoking Index | rs62175972 | 2:161362830  | T | 0.0310  | 0.0060 | 0.98 | 1.7E-08 | 19  |
| Smoking Index | rs624833   | 4:2881256    | T | 0.0130  | 0.0020 | 0.67 | 6.6E-10 | 34  |
| Smoking Index | rs6562474  | 13:67332812  | C | 0.0120  | 0.0020 | 0.58 | 1.0E-08 | 32  |
| Smoking Index | rs6598539  | 15:99204483  | T | -0.0120 | 0.0020 | 0.48 | 4.5E-09 | 33  |
| Smoking Index | rs6741228  | 2:22548774   | T | 0.0110  | 0.0020 | 0.50 | 1.6E-08 | 28  |
| Smoking Index | rs67596067 | 17:50333733  | G | 0.0130  | 0.0020 | 0.70 | 1.2E-09 | 33  |
| Smoking Index | rs6778080  | 3:49317338   | T | -0.0140 | 0.0020 | 0.23 | 1.3E-12 | 32  |
| Smoking Index | rs6779302  | 3:16859710   | G | -0.0130 | 0.0020 | 0.64 | 1.2E-09 | 36  |
| Smoking Index | rs6935954  | 6:26255451   | A | 0.0140  | 0.0020 | 0.36 | 8.2E-12 | 42  |
| Smoking Index | rs6957896  | 7:132309592  | C | -0.0110 | 0.0020 | 0.57 | 4.5E-08 | 27  |
| Smoking Index | rs6962772  | 7:99081730   | A | -0.0130 | 0.0020 | 0.78 | 7.8E-09 | 27  |
| Smoking Index | rs7039819  | 9:82430418   | G | 0.0130  | 0.0020 | 0.45 | 5.1E-10 | 39  |
| Smoking Index | rs7077678  | 10:104438565 | C | 0.0120  | 0.0020 | 0.60 | 2.6E-09 | 32  |
| Smoking Index | rs71367545 | 18:77576337  | G | -0.0150 | 0.0020 | 0.80 | 1.4E-09 | 34  |
| Smoking Index | rs7155595  | 14:77502546  | A | -0.0120 | 0.0020 | 0.70 | 2.5E-09 | 28  |
| Smoking Index | rs71627581 | 5:43161351   | G | 0.0190  | 0.0030 | 0.84 | 1.6E-09 | 44  |
| Smoking Index | rs72674867 | 8:95578201   | A | 0.0130  | 0.0020 | 0.66 | 3.8E-08 | 35  |
| Smoking Index | rs72678864 | 4:112422145  | G | 0.0180  | 0.0030 | 0.86 | 1.6E-11 | 36  |
| Smoking Index | rs7297175  | 12:56473808  | T | -0.0120 | 0.0020 | 0.42 | 6.6E-09 | 33  |

|                  |            |              |   |         |        |      |         |     |
|------------------|------------|--------------|---|---------|--------|------|---------|-----|
| Smoking Index    | rs732083   | 17:37834367  | G | 0.0110  | 0.0020 | 0.33 | 1.5E-08 | 25  |
| Smoking Index    | rs73220544 | 3:131074511  | A | 0.0120  | 0.0020 | 0.78 | 1.5E-08 | 23  |
| Smoking Index    | rs7333559  | 13:100546450 | G | 0.0150  | 0.0020 | 0.20 | 3.2E-10 | 34  |
| Smoking Index    | rs74086911 | 12:50015942  | G | 0.0210  | 0.0040 | 0.94 | 2.1E-08 | 23  |
| Smoking Index    | rs7519626  | 1:99514554   | C | 0.0120  | 0.0020 | 0.37 | 1.2E-08 | 31  |
| Smoking Index    | rs7528604  | 1:66407352   | G | 0.0140  | 0.0020 | 0.60 | 5.7E-12 | 44  |
| Smoking Index    | rs7553348  | 1:75005067   | G | 0.0140  | 0.0020 | 0.50 | 5.2E-12 | 45  |
| Smoking Index    | rs7569203  | 2:45154418   | A | -0.0160 | 0.0020 | 0.61 | 7.4E-13 | 56  |
| Smoking Index    | rs75742406 | 11:17070365  | G | 0.0140  | 0.0020 | 0.73 | 1.3E-09 | 36  |
| Smoking Index    | rs76608582 | 19:4474725   | C | 0.0310  | 0.0050 | 0.94 | 3.2E-10 | 46  |
| Smoking Index    | rs775758   | 3:77582005   | A | 0.0120  | 0.0020 | 0.47 | 1.1E-08 | 33  |
| Smoking Index    | rs7766610  | 6:111707821  | C | 0.0180  | 0.0030 | 0.27 | 2.2E-12 | 59  |
| Smoking Index    | rs7807019  | 7:117543063  | A | -0.0150 | 0.0020 | 0.46 | 6.7E-14 | 52  |
| Smoking Index    | rs8042134  | 15:97514404  | T | 0.0160  | 0.0020 | 0.53 | 1.3E-12 | 59  |
| Smoking Index    | rs8042849  | 15:78817929  | C | 0.0280  | 0.0020 | 0.37 | 1.8E-39 | 170 |
| Smoking Index    | rs860326   | 14:57342912  | C | 0.0120  | 0.0020 | 0.53 | 2.7E-09 | 33  |
| Smoking Index    | rs8614     | 17:27588806  | C | -0.0170 | 0.0030 | 0.82 | 1.8E-10 | 39  |
| Smoking Index    | rs889398   | 16:69556715  | C | 0.0130  | 0.0020 | 0.59 | 6.3E-11 | 38  |
| Smoking Index    | rs9435340  | 1:107593201  | T | 0.0120  | 0.0020 | 0.32 | 1.2E-08 | 29  |
| Smoking Index    | rs9842947  | 3:157412246  | C | -0.0130 | 0.0020 | 0.32 | 3.1E-09 | 34  |
| Smoking Index    | rs986391   | 5:166993972  | G | 0.0160  | 0.0020 | 0.37 | 9.4E-15 | 55  |
| Smoking Index    | rs9904288  | 17:47031973  | T | 0.0120  | 0.0020 | 0.73 | 3.1E-08 | 26  |
| Smoking Index    | rs9919670  | 11:112877304 | G | -0.0220 | 0.0020 | 0.45 | 7.6E-27 | 111 |
| Alcohol Drinking | rs10004020 | 4:152968372  | A | 0.0091  | 0.0016 | 0.62 | 2.4E-08 | 36  |
| Alcohol Drinking | rs10028756 | 4:100254520  | A | -0.0186 | 0.0022 | 0.11 | 1.2E-17 | 61  |
| Alcohol Drinking | rs1004787  | 2:45159091   | A | 0.0084  | 0.0015 | 0.61 | 8.4E-09 | 32  |
| Alcohol Drinking | rs10085696 | 7:69783020   | G | -0.0114 | 0.0019 | 0.21 | 1.1E-09 | 40  |
| Alcohol Drinking | rs10236149 | 7:98977515   | G | -0.0135 | 0.0022 | 0.18 | 1.2E-09 | 50  |

|                  |             |              |   |         |        |      |          |      |
|------------------|-------------|--------------|---|---------|--------|------|----------|------|
| Alcohol Drinking | rs10438820  | 17:78524597  | T | 0.0090  | 0.0016 | 0.65 | 1.8E-08  | 35   |
| Alcohol Drinking | rs10506274  | 12:81601464  | T | -0.0090 | 0.0015 | 0.45 | 5.8E-10  | 38   |
| Alcohol Drinking | rs10750025  | 11:113424042 | T | 0.0103  | 0.0016 | 0.77 | 4.9E-11  | 36   |
| Alcohol Drinking | rs10753661  | 1:165119792  | A | -0.0086 | 0.0016 | 0.70 | 3.8E-08  | 30   |
| Alcohol Drinking | rs10876188  | 12:51895882  | T | -0.0080 | 0.0015 | 0.48 | 4.8E-08  | 30   |
| Alcohol Drinking | rs10978550  | 9:109345993  | C | -0.0117 | 0.0018 | 0.22 | 7.2E-11  | 44   |
| Alcohol Drinking | rs11030084  | 11:27643725  | T | -0.0106 | 0.0019 | 0.17 | 1.7E-08  | 30   |
| Alcohol Drinking | rs1104608   | 16:73912588  | C | -0.0110 | 0.0015 | 0.42 | 1.1E-13  | 55   |
| Alcohol Drinking | rs1123285   | 14:57274519  | G | -0.0089 | 0.0015 | 0.34 | 8.1E-09  | 34   |
| Alcohol Drinking | rs113443718 | 16:29892184  | A | -0.0102 | 0.0016 | 0.30 | 1.2E-10  | 41   |
| Alcohol Drinking | rs1154414   | 4:100000136  | C | 0.0176  | 0.0021 | 0.15 | 3.7E-17  | 73   |
| Alcohol Drinking | rs11625650  | 14:104610138 | A | -0.0096 | 0.0017 | 0.19 | 2.9E-08  | 27   |
| Alcohol Drinking | rs11692435  | 2:98275354   | A | 0.0174  | 0.0026 | 0.21 | 2.5E-11  | 94   |
| Alcohol Drinking | rs11739827  | 5:166803321  | T | -0.0084 | 0.0015 | 0.50 | 1.2E-08  | 33   |
| Alcohol Drinking | rs11940694  | 4:39414993   | G | 0.0259  | 0.0015 | 0.61 | 3.0E-68  | 302  |
| Alcohol Drinking | rs12088813  | 1:66407700   | C | -0.0093 | 0.0016 | 0.26 | 1.6E-08  | 31   |
| Alcohol Drinking | rs1217091   | 8:64527399   | C | 0.0122  | 0.0019 | 0.81 | 7.1E-11  | 42   |
| Alcohol Drinking | rs1229984   | 4:100239319  | C | 0.1505  | 0.0039 | 0.89 | 1.6E-203 | 4131 |
| Alcohol Drinking | rs12499107  | 4:99678691   | G | 0.0127  | 0.0022 | 0.13 | 4.5E-09  | 34   |
| Alcohol Drinking | rs1260326   | 2:27730940   | C | 0.0209  | 0.0015 | 0.63 | 8.1E-45  | 191  |
| Alcohol Drinking | rs12651313  | 4:171086393  | G | -0.0086 | 0.0015 | 0.49 | 3.8E-09  | 35   |
| Alcohol Drinking | rs12655091  | 5:144412335  | A | -0.0083 | 0.0015 | 0.49 | 1.3E-08  | 32   |
| Alcohol Drinking | rs12795042  | 11:133658168 | C | -0.0083 | 0.0015 | 0.67 | 3.3E-08  | 29   |
| Alcohol Drinking | rs12907323  | 15:86796012  | G | 0.0085  | 0.0015 | 0.36 | 9.9E-09  | 31   |
| Alcohol Drinking | rs13024996  | 2:144225215  | A | -0.0109 | 0.0015 | 0.32 | 5.7E-13  | 49   |
| Alcohol Drinking | rs13032049  | 2:63581507   | G | 0.0102  | 0.0016 | 0.26 | 3.0E-10  | 38   |
| Alcohol Drinking | rs13066454  | 3:93994255   | T | -0.0088 | 0.0015 | 0.41 | 4.1E-09  | 35   |
| Alcohol Drinking | rs13094887  | 3:70968431   | T | -0.0103 | 0.0016 | 0.27 | 8.6E-11  | 39   |

|                  |             |              |   |         |        |      |         |     |
|------------------|-------------|--------------|---|---------|--------|------|---------|-----|
| Alcohol Drinking | rs13107325  | 4:103188709  | T | -0.0275 | 0.0028 | 0.05 | 1.5E-22 | 63  |
| Alcohol Drinking | rs13250583  | 8:20949917   | T | -0.0097 | 0.0018 | 0.24 | 4.7E-08 | 32  |
| Alcohol Drinking | rs13383034  | 2:45155276   | T | 0.0149  | 0.0016 | 0.38 | 6.3E-22 | 99  |
| Alcohol Drinking | rs144198753 | 4:99713350   | T | -0.0418 | 0.0059 | 0.02 | 1.4E-12 | 57  |
| Alcohol Drinking | rs17029090  | 4:100443853  | G | -0.0491 | 0.0052 | 0.03 | 4.8E-21 | 122 |
| Alcohol Drinking | rs1713676   | 11:113660576 | G | -0.0080 | 0.0015 | 0.54 | 4.3E-08 | 30  |
| Alcohol Drinking | rs17177078  | 16:24810681  | T | -0.0223 | 0.0030 | 0.07 | 1.3E-13 | 57  |
| Alcohol Drinking | rs17665139  | 10:125093880 | T | -0.0116 | 0.0020 | 0.13 | 1.6E-08 | 29  |
| Alcohol Drinking | rs2011092   | 3:141124607  | C | -0.0089 | 0.0015 | 0.35 | 7.4E-09 | 34  |
| Alcohol Drinking | rs2165670   | 4:100286085  | A | 0.0231  | 0.0024 | 0.13 | 1.7E-22 | 112 |
| Alcohol Drinking | rs2178197   | 2:27860551   | G | -0.0088 | 0.0015 | 0.54 | 2.5E-09 | 36  |
| Alcohol Drinking | rs2180870   | 14:58782779  | C | -0.0122 | 0.0021 | 0.12 | 1.1E-08 | 30  |
| Alcohol Drinking | rs2472297   | 15:75027880  | T | 0.0106  | 0.0017 | 0.24 | 3.1E-10 | 38  |
| Alcohol Drinking | rs2532276   | 17:44246624  | A | -0.0218 | 0.0026 | 0.08 | 1.6E-17 | 68  |
| Alcohol Drinking | rs2764771   | 16:20013793  | A | 0.0099  | 0.0016 | 0.37 | 4.0E-10 | 43  |
| Alcohol Drinking | rs281379    | 19:49214274  | A | 0.0137  | 0.0015 | 0.41 | 4.9E-21 | 86  |
| Alcohol Drinking | rs2854334   | 17:29715500  | G | 0.0092  | 0.0015 | 0.59 | 7.5E-10 | 39  |
| Alcohol Drinking | rs28601761  | 8:126500031  | G | 0.0091  | 0.0015 | 0.40 | 7.2E-10 | 37  |
| Alcohol Drinking | rs28680958  | 1:173848808  | A | -0.0110 | 0.0018 | 0.21 | 5.1E-10 | 38  |
| Alcohol Drinking | rs28929474  | 14:94844947  | T | -0.0368 | 0.0054 | 0.02 | 1.3E-11 | 48  |
| Alcohol Drinking | rs35034355  | 7:103840115  | A | -0.0081 | 0.0015 | 0.48 | 2.9E-08 | 31  |
| Alcohol Drinking | rs35538052  | 4:39418965   | A | -0.0085 | 0.0015 | 0.36 | 1.4E-08 | 32  |
| Alcohol Drinking | rs36052336  | 4:100273594  | G | -0.0184 | 0.0030 | 0.06 | 1.2E-09 | 38  |
| Alcohol Drinking | rs3748034   | 4:3446091    | T | -0.0117 | 0.0021 | 0.13 | 1.7E-08 | 30  |
| Alcohol Drinking | rs378421    | 16:28754684  | A | -0.0112 | 0.0015 | 0.34 | 4.8E-14 | 53  |
| Alcohol Drinking | rs3803800   | 17:7462969   | G | 0.0114  | 0.0018 | 0.75 | 1.5E-10 | 46  |
| Alcohol Drinking | rs3809162   | 12:54674235  | G | 0.0091  | 0.0015 | 0.46 | 1.2E-09 | 38  |
| Alcohol Drinking | rs4092465   | 18:55080437  | G | -0.0083 | 0.0015 | 0.61 | 4.4E-08 | 31  |

|                  |            |              |   |         |        |      |         |     |
|------------------|------------|--------------|---|---------|--------|------|---------|-----|
| Alcohol Drinking | rs4501255  | 4:42151306   | G | 0.0107  | 0.0017 | 0.23 | 4.8E-10 | 38  |
| Alcohol Drinking | rs4548913  | 17:2209888   | A | -0.0084 | 0.0015 | 0.61 | 3.1E-08 | 31  |
| Alcohol Drinking | rs4690727  | 4:143648579  | G | 0.0108  | 0.0016 | 0.73 | 2.4E-11 | 44  |
| Alcohol Drinking | rs4699791  | 4:101243023  | A | 0.0186  | 0.0025 | 0.13 | 6.6E-14 | 75  |
| Alcohol Drinking | rs4815364  | 20:25035711  | A | 0.0086  | 0.0015 | 0.63 | 1.0E-08 | 32  |
| Alcohol Drinking | rs4842786  | 12:92170791  | A | -0.0088 | 0.0015 | 0.61 | 2.7E-09 | 35  |
| Alcohol Drinking | rs4916723  | 5:87854395   | C | -0.0100 | 0.0015 | 0.44 | 1.7E-11 | 46  |
| Alcohol Drinking | rs4938230  | 11:116075001 | A | 0.0128  | 0.0020 | 0.81 | 1.5E-10 | 47  |
| Alcohol Drinking | rs500321   | 13:27124360  | T | -0.0097 | 0.0017 | 0.75 | 4.9E-09 | 33  |
| Alcohol Drinking | rs5024204  | 1:71491890   | T | 0.0097  | 0.0016 | 0.28 | 2.6E-09 | 35  |
| Alcohol Drinking | rs55872084 | 5:155902003  | T | 0.0100  | 0.0017 | 0.18 | 6.3E-09 | 28  |
| Alcohol Drinking | rs55932213 | 9:108755622  | G | 0.0095  | 0.0017 | 0.72 | 9.6E-09 | 34  |
| Alcohol Drinking | rs56030824 | 11:47397353  | A | -0.0116 | 0.0016 | 0.31 | 1.2E-13 | 55  |
| Alcohol Drinking | rs56337305 | 2:225475560  | C | -0.0096 | 0.0015 | 0.35 | 1.6E-10 | 39  |
| Alcohol Drinking | rs58107686 | 1:33837334   | A | -0.0097 | 0.0016 | 0.33 | 7.8E-10 | 39  |
| Alcohol Drinking | rs60654199 | 3:141267295  | A | -0.0167 | 0.0030 | 0.06 | 2.9E-08 | 30  |
| Alcohol Drinking | rs62044525 | 16:64872590  | G | -0.0122 | 0.0019 | 0.15 | 1.0E-10 | 36  |
| Alcohol Drinking | rs62250685 | 3:85457240   | G | -0.0144 | 0.0015 | 0.66 | 1.1E-21 | 88  |
| Alcohol Drinking | rs6460047  | 7:73042443   | C | 0.0116  | 0.0018 | 0.18 | 9.7E-11 | 37  |
| Alcohol Drinking | rs6787172  | 3:158187811  | G | -0.0080 | 0.0015 | 0.53 | 4.3E-08 | 30  |
| Alcohol Drinking | rs682011   | 11:121544285 | C | 0.0082  | 0.0015 | 0.59 | 2.2E-08 | 31  |
| Alcohol Drinking | rs6951574  | 7:153489744  | C | 0.0132  | 0.0015 | 0.39 | 1.6E-19 | 78  |
| Alcohol Drinking | rs705687   | 1:4548453    | G | -0.0109 | 0.0018 | 0.80 | 8.2E-10 | 35  |
| Alcohol Drinking | rs7074871  | 10:110507806 | A | -0.0094 | 0.0017 | 0.24 | 1.9E-08 | 31  |
| Alcohol Drinking | rs7185555  | 16:69131281  | C | -0.0111 | 0.0020 | 0.13 | 4.2E-08 | 26  |
| Alcohol Drinking | rs72859280 | 2:147956293  | T | 0.0229  | 0.0039 | 0.04 | 4.4E-09 | 41  |
| Alcohol Drinking | rs77165542 | 2:430975     | T | -0.0260 | 0.0040 | 0.02 | 5.6E-11 | 24  |
| Alcohol Drinking | rs79139602 | 4:100444363  | T | 0.0603  | 0.0051 | 0.04 | 1.8E-32 | 276 |

|                      |            |              |   |         |        |      |          |      |
|----------------------|------------|--------------|---|---------|--------|------|----------|------|
| Alcohol Drinking     | rs7950166  | 11:8642218   | T | -0.0098 | 0.0015 | 0.63 | 9.9E-11  | 42   |
| Alcohol Drinking     | rs79616692 | 16:72338507  | C | 0.0163  | 0.0024 | 0.12 | 4.1E-12  | 52   |
| Alcohol Drinking     | rs823114   | 1:205719532  | A | 0.0088  | 0.0015 | 0.56 | 2.3E-09  | 36   |
| Alcohol Drinking     | rs828867   | 2:74334462   | A | 0.0088  | 0.0015 | 0.59 | 2.2E-09  | 35   |
| Alcohol Drinking     | rs9607814  | 22:41946519  | A | -0.0102 | 0.0019 | 0.22 | 4.3E-08  | 34   |
| Alcohol Drinking     | rs9838144  | 3:131576287  | C | -0.0100 | 0.0018 | 0.21 | 2.7E-08  | 31   |
| Alcohol Drinking     | rs9950000  | 18:53052169  | T | -0.0091 | 0.0015 | 0.39 | 9.4E-10  | 37   |
| Alcohol Dependence   | rs1229984  | 4:100239319  | T | -0.7215 | 0.1025 | 0.11 | 9.8E-13  | 5197 |
| Alcohol Dependence   | rs3811802  | 4:100244221  | G | 0.1501  | 0.0275 | 0.49 | 2.4E-08  | 531  |
| Alcohol Dependence   | rs894368   | 4:100309313  | A | -0.1199 | 0.0218 | 0.28 | 1.9E-08  | 269  |
| Coffee consumption   | rs1057868  | 7:75615006   | T | 0.0394  | 0.0032 | 0.36 | 5.3E-33  | 269  |
| Coffee consumption   | rs10865548 | 2:631606     | G | 0.0308  | 0.0038 | 0.82 | 4.5E-15  | 104  |
| Coffee consumption   | rs1260326  | 2:27730940   | C | 0.0272  | 0.0030 | 0.63 | 2.6E-19  | 129  |
| Coffee consumption   | rs1956218  | 14:33075243  | G | 0.0164  | 0.0030 | 0.49 | 3.6E-08  | 51   |
| Coffee consumption   | rs2330783  | 22:24747031  | G | 0.0906  | 0.0126 | 0.99 | 1.6E-12  | 71   |
| Coffee consumption   | rs2472297  | 15:75027880  | T | 0.0908  | 0.0034 | 0.24 | 5.2E-155 | 1121 |
| Coffee consumption   | rs34060476 | 7:73037956   | G | 0.0378  | 0.0044 | 0.13 | 5.1E-18  | 121  |
| Coffee consumption   | rs4410790  | 7:17284577   | C | 0.0788  | 0.0030 | 0.63 | 5.6E-141 | 1093 |
| Coffee consumption   | rs574367   | 1:177873210  | T | 0.0210  | 0.0036 | 0.19 | 8.1E-09  | 50   |
| Coffee consumption   | rs597045   | 11:56272114  | A | 0.0214  | 0.0032 | 0.67 | 6.6E-11  | 76   |
| Coffee consumption   | rs66723169 | 18:57808978  | A | 0.0294  | 0.0036 | 0.21 | 9.9E-17  | 107  |
| Coffee consumption   | rs73073176 | 7:17562952   | C | 0.0462  | 0.0044 | 0.90 | 5.6E-25  | 145  |
| Caffeine consumption | rs2470893  | 15:75019449  | T | 0.1200  | 0.0160 | 0.27 | 5.2E-14  | 57   |
| Caffeine consumption | rs4410790  | 7:17284577   | C | 0.1500  | 0.0170 | 0.63 | 2.4E-19  | 105  |
| Sleep Duration       | rs10173260 | 2:210377845  | C | 0.0128  | 0.0023 | 0.57 | 2.9E-08  | 36   |
| Sleep Duration       | rs10421649 | 19:9942262   | A | 0.0133  | 0.0023 | 0.50 | 6.9E-09  | 39   |
| Sleep Duration       | rs10483350 | 14:29816155  | G | 0.0174  | 0.0029 | 0.20 | 1.5E-09  | 44   |
| Sleep Duration       | rs1057703  | 11:122830251 | G | 0.0194  | 0.0032 | 0.15 | 1.1E-09  | 43   |



|                |             |              |   |        |        |      |         |    |
|----------------|-------------|--------------|---|--------|--------|------|---------|----|
| Sleep Duration | rs10761674  | 10:64618340  | C | 0.0123 | 0.0023 | 0.47 | 4.2E-08 | 34 |
| Sleep Duration | rs10973207  | 9:37100525   | T | 0.0204 | 0.0031 | 0.21 | 6.0E-11 | 63 |
| Sleep Duration | rs11190970  | 10:103128332 | G | 0.0154 | 0.0028 | 0.82 | 4.6E-08 | 31 |
| Sleep Duration | rs112230981 | 3:55879269   | A | 0.0315 | 0.0052 | 0.97 | 2.2E-09 | 27 |
| Sleep Duration | rs113113059 | 6:43160375   | T | 0.0161 | 0.0027 | 0.80 | 8.4E-09 | 38 |
| Sleep Duration | rs11567976  | 5:137654218  | T | 0.0128 | 0.0023 | 0.51 | 2.1E-08 | 37 |
| Sleep Duration | rs11602180  | 11:48162453  | C | 0.0183 | 0.0031 | 0.84 | 2.3E-09 | 41 |
| Sleep Duration | rs11621908  | 14:78495761  | C | 0.0241 | 0.0042 | 0.93 | 5.6E-09 | 33 |
| Sleep Duration | rs11643715  | 16:23909538  | G | 0.0139 | 0.0025 | 0.27 | 3.2E-08 | 34 |
| Sleep Duration | rs11885663  | 2:166944004  | T | 0.0162 | 0.0026 | 0.21 | 8.6E-10 | 39 |
| Sleep Duration | rs12246842  | 10:21830580  | A | 0.0134 | 0.0023 | 0.45 | 3.9E-09 | 40 |
| Sleep Duration | rs12567114  | 1:98527951   | A | 0.0148 | 0.0025 | 0.27 | 4.3E-09 | 38 |
| Sleep Duration | rs12607679  | 18:53059748  | T | 0.0201 | 0.0026 | 0.76 | 8.3E-15 | 66 |
| Sleep Duration | rs12611523  | 2:139195328  | A | 0.0126 | 0.0023 | 0.60 | 3.1E-08 | 34 |
| Sleep Duration | rs1263056   | 11:116576415 | A | 0.0128 | 0.0023 | 0.44 | 2.0E-08 | 36 |
| Sleep Duration | rs12791153  | 11:80685181  | T | 0.0236 | 0.0042 | 0.07 | 1.9E-08 | 34 |
| Sleep Duration | rs13088093  | 3:135838598  | G | 0.0163 | 0.0024 | 0.30 | 7.0E-12 | 49 |
| Sleep Duration | rs13109404  | 4:102896591  | T | 0.0312 | 0.0044 | 0.96 | 1.4E-12 | 32 |
| Sleep Duration | rs151014368 | 5:176751059  | A | 0.0161 | 0.0028 | 0.23 | 9.1E-09 | 41 |
| Sleep Duration | rs1517572   | 11:28829882  | C | 0.0147 | 0.0023 | 0.64 | 1.5E-10 | 44 |
| Sleep Duration | rs1553132   | 11:88297740  | G | 0.0145 | 0.0026 | 0.24 | 2.5E-08 | 35 |
| Sleep Duration | rs17427571  | 4:82254908   | A | 0.0138 | 0.0024 | 0.65 | 1.3E-08 | 39 |
| Sleep Duration | rs174560    | 11:61581764  | C | 0.0136 | 0.0024 | 0.35 | 2.8E-08 | 38 |
| Sleep Duration | rs17732997  | 3:70470834   | C | 0.0129 | 0.0023 | 0.61 | 1.2E-08 | 35 |
| Sleep Duration | rs1776776   | 9:140497072  | T | 0.0200 | 0.0034 | 0.82 | 4.9E-09 | 52 |
| Sleep Duration | rs1939455   | 11:101520886 | G | 0.0204 | 0.0036 | 0.91 | 1.2E-08 | 32 |
| Sleep Duration | rs1991556   | 17:44083402  | G | 0.0166 | 0.0027 | 0.91 | 1.0E-09 | 20 |
| Sleep Duration | rs205024    | 17:11227352  | T | 0.0138 | 0.0023 | 0.39 | 3.9E-09 | 41 |

|                |            |              |   |        |        |      |         |    |
|----------------|------------|--------------|---|--------|--------|------|---------|----|
| Sleep Duration | rs2072727  | 20:43538733  | T | 0.0133 | 0.0023 | 0.46 | 7.9E-09 | 39 |
| Sleep Duration | rs2079070  | 7:114126432  | C | 0.0176 | 0.0026 | 0.22 | 7.5E-12 | 47 |
| Sleep Duration | rs2192528  | 4:18327896   | A | 0.0134 | 0.0023 | 0.54 | 2.7E-09 | 40 |
| Sleep Duration | rs2231265  | 6:89790201   | G | 0.0150 | 0.0027 | 0.80 | 2.7E-08 | 32 |
| Sleep Duration | rs269054   | 1:57864304   | A | 0.0137 | 0.0023 | 0.36 | 2.1E-09 | 38 |
| Sleep Duration | rs3095508  | 16:6550400   | C | 0.0154 | 0.0023 | 0.57 | 3.1E-11 | 52 |
| Sleep Duration | rs330088   | 8:9149746    | C | 0.0145 | 0.0023 | 0.59 | 2.7E-10 | 45 |
| Sleep Duration | rs34354917 | 12:38764559  | C | 0.0138 | 0.0025 | 0.75 | 3.9E-08 | 32 |
| Sleep Duration | rs34731055 | 7:2106928    | T | 0.0195 | 0.0030 | 0.22 | 3.7E-11 | 58 |
| Sleep Duration | rs35531607 | 4:92533225   | C | 0.0128 | 0.0023 | 0.43 | 1.5E-08 | 36 |
| Sleep Duration | rs365663   | 5:1428883    | A | 0.0146 | 0.0023 | 0.46 | 1.0E-10 | 47 |
| Sleep Duration | rs374153   | 2:40382712   | C | 0.0176 | 0.0031 | 0.20 | 9.1E-09 | 44 |
| Sleep Duration | rs4128364  | 2:147612734  | C | 0.0146 | 0.0024 | 0.35 | 1.4E-09 | 43 |
| Sleep Duration | rs4538155  | 2:157040773  | T | 0.0130 | 0.0024 | 0.64 | 3.6E-08 | 35 |
| Sleep Duration | rs4592416  | 11:43800474  | G | 0.0147 | 0.0023 | 0.48 | 9.3E-11 | 48 |
| Sleep Duration | rs460692   | 5:3126584    | C | 0.0211 | 0.0033 | 0.20 | 3.6E-10 | 64 |
| Sleep Duration | rs4767550  | 12:117951150 | G | 0.0143 | 0.0023 | 0.42 | 6.3E-10 | 44 |
| Sleep Duration | rs55658675 | 14:65554638  | C | 0.0131 | 0.0024 | 0.64 | 2.0E-08 | 35 |
| Sleep Duration | rs56372231 | 5:102321905  | T | 0.0170 | 0.0024 | 0.33 | 2.2E-12 | 57 |
| Sleep Duration | rs61796569 | 1:66476437   | T | 0.0155 | 0.0026 | 0.27 | 1.5E-09 | 42 |
| Sleep Duration | rs61985058 | 14:60233841  | T | 0.0186 | 0.0032 | 0.10 | 1.3E-08 | 29 |
| Sleep Duration | rs62120041 | 2:9185564    | T | 0.0261 | 0.0046 | 0.92 | 9.6E-09 | 42 |
| Sleep Duration | rs6575005  | 14:26954078  | T | 0.0156 | 0.0027 | 0.78 | 4.4E-09 | 37 |
| Sleep Duration | rs7115226  | 11:113408518 | A | 0.0266 | 0.0044 | 0.06 | 1.7E-09 | 38 |
| Sleep Duration | rs72804080 | 2:59358659   | G | 0.0178 | 0.0032 | 0.16 | 2.9E-08 | 38 |
| Sleep Duration | rs73219758 | 8:14279446   | G | 0.0164 | 0.0025 | 0.75 | 5.6E-11 | 45 |
| Sleep Duration | rs7503199  | 17:8134275   | C | 0.0148 | 0.0026 | 0.76 | 1.0E-08 | 35 |
| Sleep Duration | rs75539574 | 2:58871658   | C | 0.0363 | 0.0041 | 0.08 | 6.9E-19 | 89 |

|                      |            |              |   |        |        |      |         |     |
|----------------------|------------|--------------|---|--------|--------|------|---------|-----|
| Sleep Duration       | rs7556815  | 2:114085785  | A | 0.0407 | 0.0027 | 0.22 | 1.3E-49 | 255 |
| Sleep Duration       | rs7644809  | 3:107564459  | T | 0.0131 | 0.0023 | 0.45 | 1.6E-08 | 38  |
| Sleep Duration       | rs7806045  | 7:132610266  | T | 0.0148 | 0.0026 | 0.73 | 1.4E-08 | 38  |
| Sleep Duration       | rs7915425  | 10:125016501 | T | 0.0191 | 0.0030 | 0.17 | 2.0E-10 | 47  |
| Sleep Duration       | rs7951019  | 11:118358027 | G | 0.0369 | 0.0065 | 0.03 | 1.2E-08 | 37  |
| Sleep Duration       | rs80193650 | 6:33464363   | G | 0.0168 | 0.0031 | 0.13 | 4.1E-08 | 28  |
| Sleep Duration       | rs8038326  | 15:47989799  | A | 0.0159 | 0.0025 | 0.71 | 2.8E-10 | 46  |
| Sleep Duration       | rs8050478  | 16:56120461  | G | 0.0160 | 0.0023 | 0.54 | 1.7E-12 | 57  |
| Sleep Duration       | rs915416   | 1:34731984   | C | 0.0193 | 0.0025 | 0.31 | 9.9E-15 | 71  |
| Sleep Duration       | rs9345234  | 6:93162639   | C | 0.0130 | 0.0023 | 0.54 | 1.8E-08 | 38  |
| Sleep Duration       | rs9382445  | 6:54937974   | T | 0.0145 | 0.0023 | 0.62 | 4.8E-10 | 44  |
| Sleep Duration       | rs9903973  | 17:50571227  | C | 0.0128 | 0.0023 | 0.44 | 2.6E-08 | 36  |
| Sleep Duration       | rs9940646  | 16:53800629  | C | 0.0170 | 0.0023 | 0.58 | 1.2E-13 | 63  |
| Short Sleep Duration | rs11763750 | 7:2080114    | G | 0.0350 | 0.0080 | 0.74 | 5.1E-09 | 210 |
| Short Sleep Duration | rs1229762  | 7:114218582  | T | 0.0370 | 0.0030 | 0.68 | 1.1E-12 | 265 |
| Short Sleep Duration | rs12518468 | 5:7249696    | C | 0.0310 | 0.0060 | 0.33 | 8.5E-09 | 191 |
| Short Sleep Duration | rs12567114 | 1:98527951   | G | 0.0360 | 0.0070 | 0.73 | 4.1E-09 | 226 |
| Short Sleep Duration | rs12661667 | 6:41792545   | T | 0.0280 | 0.0070 | 0.24 | 2.8E-08 | 128 |
| Short Sleep Duration | rs12963463 | 18:53099093  | C | 0.0290 | 0.0060 | 0.28 | 1.9E-11 | 152 |
| Short Sleep Duration | rs13107325 | 4:103188709  | T | 0.0750 | 0.0110 | 0.05 | 2.5E-13 | 220 |
| Short Sleep Duration | rs1380703  | 2:57941287   | G | 0.0350 | 0.0060 | 0.37 | 1.6E-11 | 256 |
| Short Sleep Duration | rs1607227  | 11:28808617  | G | 0.0310 | 0.0070 | 0.73 | 1.5E-09 | 169 |
| Short Sleep Duration | rs17005118 | 4:82288564   | A | 0.0300 | 0.0070 | 0.25 | 2.5E-09 | 151 |
| Short Sleep Duration | rs17388803 | 15:48027204  | C | 0.0530 | 0.0100 | 0.09 | 6.5E-10 | 207 |
| Short Sleep Duration | rs2014830  | 3:50172397   | C | 0.0300 | 0.0060 | 0.66 | 2.7E-08 | 180 |
| Short Sleep Duration | rs205024   | 17:11227352  | C | 0.0310 | 0.0060 | 0.61 | 2.7E-08 | 205 |
| Short Sleep Duration | rs2186122  | 1:66470206   | T | 0.0240 | 0.0060 | 0.58 | 4.8E-09 | 125 |
| Short Sleep Duration | rs2820313  | 1:201870221  | G | 0.0310 | 0.0060 | 0.30 | 2.3E-09 | 181 |

|                      |            |              |   |         |        |      |         |      |
|----------------------|------------|--------------|---|---------|--------|------|---------|------|
| Short Sleep Duration | rs2863957  | 2:114089551  | C | 0.0540  | 0.0070 | 0.78 | 2.6E-18 | 449  |
| Short Sleep Duration | rs3776864  | 5:102327868  | A | 0.0310  | 0.0060 | 0.68 | 1.7E-08 | 186  |
| Short Sleep Duration | rs4585442  | 5:135508381  | G | 0.0310  | 0.0060 | 0.30 | 8.1E-10 | 180  |
| Short Sleep Duration | rs5757675  | 22:39838892  | G | 0.0340  | 0.0070 | 0.27 | 2.7E-09 | 204  |
| Short Sleep Duration | rs59779556 | 16:56227965  | T | 0.0250  | 0.0060 | 0.51 | 2.0E-08 | 139  |
| Short Sleep Duration | rs60882754 | 8:52886619   | A | 0.0550  | 0.0120 | 0.96 | 1.8E-08 | 108  |
| Short Sleep Duration | rs7524118  | 1:34736052   | C | 0.0300  | 0.0060 | 0.69 | 4.9E-08 | 172  |
| Short Sleep Duration | rs75539574 | 2:58871658   | A | 0.0450  | 0.0110 | 0.92 | 8.4E-11 | 137  |
| Short Sleep Duration | rs7939345  | 11:47980568  | T | 0.0350  | 0.0070 | 0.20 | 4.0E-08 | 174  |
| Short Sleep Duration | rs9321171  | 6:129848635  | C | 0.0310  | 0.0060 | 0.61 | 4.2E-08 | 205  |
| Short Sleep Duration | rs9367621  | 6:55040290   | T | 0.0240  | 0.0060 | 0.43 | 1.6E-08 | 126  |
| Long Sleep Duration  | rs10899257 | 11:76415209  | A | 0.0680  | 0.0130 | 0.14 | 4.6E-08 | 511  |
| Long Sleep Duration  | rs17688916 | 17:43778680  | T | 0.0710  | 0.0120 | 0.94 | 1.1E-11 | 260  |
| Long Sleep Duration  | rs17817288 | 16:53807764  | A | 0.0390  | 0.0090 | 0.51 | 8.9E-09 | 339  |
| Long Sleep Duration  | rs3751046  | 11:122828342 | G | 0.0700  | 0.0130 | 0.16 | 2.0E-08 | 599  |
| Long Sleep Duration  | rs6737318  | 2:114083120  | G | 0.0760  | 0.0110 | 0.22 | 3.4E-13 | 884  |
| Long Sleep Duration  | rs7534398  | 1:7767464    | A | 0.0470  | 0.0120 | 0.20 | 2.1E-08 | 311  |
| Long Sleep Duration  | rs75458655 | 11:118115331 | T | 0.1850  | 0.0290 | 0.02 | 5.4E-12 | 643  |
| Insomnia             | rs1015438  | 16:51177517  | A | 0.0583  | 0.0080 | 0.22 | 2.5E-14 | 1572 |
| Insomnia             | rs1031654  | 13:54382035  | A | -0.0513 | 0.0070 | 0.79 | 3.9E-12 | 1164 |
| Insomnia             | rs1038093  | 15:74012409  | T | 0.0392  | 0.0060 | 0.60 | 2.5E-10 | 986  |
| Insomnia             | rs10502966 | 18:50748499  | A | -0.0387 | 0.0060 | 0.59 | 8.5E-11 | 965  |
| Insomnia             | rs1064939  | 11:118396331 | A | 0.1302  | 0.0200 | 0.98 | 2.2E-10 | 932  |
| Insomnia             | rs10756571 | 9:14534505   | T | 0.0363  | 0.0060 | 0.66 | 1.8E-08 | 786  |
| Insomnia             | rs10758593 | 9:4292083    | A | -0.0356 | 0.0060 | 0.43 | 4.9E-09 | 830  |
| Insomnia             | rs10761240 | 9:96361922   | A | -0.0429 | 0.0060 | 0.39 | 2.1E-12 | 1164 |
| Insomnia             | rs10800992 | 1:190900576  | T | 0.0421  | 0.0060 | 0.41 | 3.8E-12 | 1144 |
| Insomnia             | rs10825503 | 10:57177470  | T | 0.0334  | 0.0060 | 0.42 | 1.4E-08 | 723  |

|          |             |             |   |         |        |      |         |      |
|----------|-------------|-------------|---|---------|--------|------|---------|------|
| Insomnia | rs10865954  | 3:49211989  | T | 0.0421  | 0.0060 | 0.30 | 1.9E-11 | 984  |
| Insomnia | rs10898940  | 11:73455292 | A | 0.0344  | 0.0060 | 0.57 | 8.1E-09 | 775  |
| Insomnia | rs10928256  | 2:146458738 | T | 0.0344  | 0.0060 | 0.47 | 1.6E-08 | 785  |
| Insomnia | rs10944696  | 6:94498850  | A | -0.0377 | 0.0070 | 0.32 | 8.0E-09 | 826  |
| Insomnia | rs10947428  | 6:33647058  | T | -0.0683 | 0.0070 | 0.84 | 9.1E-21 | 1636 |
| Insomnia | rs10947690  | 6:37631768  | A | -0.0471 | 0.0070 | 0.78 | 4.0E-12 | 1015 |
| Insomnia | rs10947987  | 6:41754370  | T | -0.0325 | 0.0060 | 0.45 | 4.1E-08 | 698  |
| Insomnia | rs10955647  | 8:114154187 | T | 0.0334  | 0.0060 | 0.56 | 1.8E-08 | 733  |
| Insomnia | rs11001276  | 10:76825638 | A | -0.0377 | 0.0070 | 0.71 | 2.5E-08 | 775  |
| Insomnia | rs11090039  | 22:41496800 | A | 0.0392  | 0.0070 | 0.30 | 1.8E-09 | 858  |
| Insomnia | rs11119409  | 1:210293333 | T | -0.0346 | 0.0060 | 0.52 | 1.2E-08 | 795  |
| Insomnia | rs11149313  | 13:85294881 | A | 0.0402  | 0.0070 | 0.62 | 2.4E-09 | 1011 |
| Insomnia | rs113851554 | 2:66750564  | T | 0.2062  | 0.0140 | 0.07 | 1.6E-51 | 7024 |
| Insomnia | rs1147852   | 6:147980909 | A | 0.0392  | 0.0060 | 0.29 | 9.9E-10 | 852  |
| Insomnia | rs11588755  | 1:57819204  | A | -0.0346 | 0.0060 | 0.44 | 5.1E-09 | 783  |
| Insomnia | rs11605348  | 11:47606483 | A | -0.0450 | 0.0060 | 0.35 | 7.0E-13 | 1222 |
| Insomnia | rs116466468 | 2:159137557 | T | 0.0440  | 0.0070 | 0.74 | 2.1E-10 | 1005 |
| Insomnia | rs11650304  | 17:46035001 | C | 0.0667  | 0.0120 | 0.93 | 1.2E-08 | 801  |
| Insomnia | rs1167132   | 12:43484487 | T | 0.0354  | 0.0060 | 0.38 | 8.7E-09 | 783  |
| Insomnia | rs11679943  | 2:77724624  | A | 0.0373  | 0.0060 | 0.37 | 3.2E-09 | 867  |
| Insomnia | rs117152417 | 6:166411281 | A | -0.1473 | 0.0260 | 0.01 | 2.8E-08 | 589  |
| Insomnia | rs11722569  | 4:112822731 | T | 0.0344  | 0.0060 | 0.67 | 2.9E-08 | 702  |
| Insomnia | rs11756035  | 6:18843810  | C | 0.0507  | 0.0090 | 0.10 | 1.3E-08 | 610  |
| Insomnia | rs11803128  | 1:190060095 | A | -0.0408 | 0.0060 | 0.65 | 6.8E-11 | 1014 |
| Insomnia | rs118166957 | 9:8858043   | T | 0.0677  | 0.0080 | 0.13 | 1.9E-16 | 1421 |
| Insomnia | rs12030482  | 1:96961268  | A | 0.0411  | 0.0070 | 0.20 | 8.2E-09 | 711  |
| Insomnia | rs12187443  | 5:102660400 | T | 0.0402  | 0.0060 | 0.67 | 1.6E-10 | 953  |
| Insomnia | rs12251016  | 10:21821918 | A | -0.0387 | 0.0060 | 0.68 | 3.9E-10 | 876  |

|          |             |              |   |         |        |      |         |      |
|----------|-------------|--------------|---|---------|--------|------|---------|------|
| Insomnia | rs12310246  | 12:84700945  | A | 0.0450  | 0.0070 | 0.21 | 4.7E-11 | 881  |
| Insomnia | rs12454003  | 18:26315799  | C | -0.0346 | 0.0060 | 0.46 | 4.9E-09 | 790  |
| Insomnia | rs12520974  | 5:61514611   | T | -0.0356 | 0.0060 | 0.49 | 1.7E-09 | 845  |
| Insomnia | rs12605642  | 18:31313965  | T | 0.0354  | 0.0060 | 0.54 | 2.1E-09 | 829  |
| Insomnia | rs12666306  | 7:115082406  | A | 0.0421  | 0.0060 | 0.55 | 2.2E-12 | 1169 |
| Insomnia | rs12790660  | 11:57667222  | T | -0.0398 | 0.0060 | 0.66 | 4.5E-10 | 942  |
| Insomnia | rs1289939   | 1:117944435  | T | -0.0408 | 0.0070 | 0.26 | 6.0E-09 | 864  |
| Insomnia | rs12912299  | 15:38897857  | T | -0.0429 | 0.0060 | 0.46 | 4.4E-13 | 1220 |
| Insomnia | rs12917449  | 15:74331659  | A | -0.0419 | 0.0080 | 0.76 | 3.0E-08 | 845  |
| Insomnia | rs12924275  | 16:9191790   | T | 0.0383  | 0.0070 | 0.28 | 1.9E-08 | 789  |
| Insomnia | rs12983032  | 19:5073447   | A | -0.0429 | 0.0060 | 0.42 | 1.1E-11 | 1195 |
| Insomnia | rs12991815  | 2:68071990   | C | 0.0402  | 0.0060 | 0.44 | 3.0E-11 | 1058 |
| Insomnia | rs13010288  | 2:51824512   | T | -0.0598 | 0.0090 | 0.10 | 9.3E-12 | 872  |
| Insomnia | rs13135092  | 4:103198082  | A | -0.0888 | 0.0110 | 0.95 | 2.5E-16 | 957  |
| Insomnia | rs13138995  | 4:148987430  | A | 0.0344  | 0.0060 | 0.38 | 2.0E-08 | 743  |
| Insomnia | rs138678612 | 6:30932223   | A | -0.1165 | 0.0200 | 0.98 | 1.4E-08 | 685  |
| Insomnia | rs1519102   | 2:66677816   | C | -0.0367 | 0.0060 | 0.67 | 1.9E-08 | 786  |
| Insomnia | rs152555    | 5:106849674  | A | -0.0523 | 0.0080 | 0.85 | 4.8E-10 | 920  |
| Insomnia | rs1530938   | 2:236900633  | A | 0.0363  | 0.0060 | 0.46 | 8.8E-10 | 874  |
| Insomnia | rs1536053   | 13:111982291 | T | -0.0377 | 0.0060 | 0.29 | 6.0E-09 | 781  |
| Insomnia | rs1567084   | 3:71435955   | A | 0.0334  | 0.0060 | 0.53 | 2.1E-08 | 742  |
| Insomnia | rs1580173   | 3:107955515  | A | 0.0334  | 0.0060 | 0.48 | 2.3E-08 | 743  |
| Insomnia | rs1620977   | 1:72729142   | A | 0.0516  | 0.0070 | 0.27 | 2.3E-14 | 1407 |
| Insomnia | rs16903122  | 5:87693561   | T | 0.0554  | 0.0070 | 0.24 | 9.0E-16 | 1502 |
| Insomnia | rs16990210  | 4:34720226   | T | -0.0460 | 0.0080 | 0.84 | 2.0E-08 | 749  |
| Insomnia | rs17005118  | 4:82288564   | A | 0.0421  | 0.0070 | 0.25 | 6.1E-10 | 886  |
| Insomnia | rs17025198  | 3:88001713   | A | 0.0411  | 0.0070 | 0.25 | 2.2E-08 | 835  |
| Insomnia | rs17083297  | 5:92995477   | A | -0.0440 | 0.0080 | 0.11 | 1.6E-08 | 485  |

|          |            |              |   |         |        |      |         |      |
|----------|------------|--------------|---|---------|--------|------|---------|------|
| Insomnia | rs17223714 | 5:50492629   | A | 0.0459  | 0.0070 | 0.75 | 2.4E-10 | 1041 |
| Insomnia | rs1731951  | 7:137075847  | A | -0.0346 | 0.0060 | 0.45 | 1.4E-08 | 788  |
| Insomnia | rs17367725 | 5:107112116  | T | -0.0356 | 0.0060 | 0.30 | 9.3E-09 | 716  |
| Insomnia | rs17520265 | 7:119674508  | A | -0.0910 | 0.0160 | 0.02 | 2.9E-08 | 498  |
| Insomnia | rs17643634 | 8:91650818   | T | -0.0598 | 0.0080 | 0.15 | 1.3E-13 | 1189 |
| Insomnia | rs176644   | 15:89913632  | T | 0.0354  | 0.0060 | 0.43 | 9.5E-09 | 816  |
| Insomnia | rs1861412  | 2:58893065   | A | 0.0383  | 0.0060 | 0.48 | 1.7E-10 | 974  |
| Insomnia | rs190073   | 7:10985188   | A | -0.0336 | 0.0060 | 0.45 | 2.9E-08 | 742  |
| Insomnia | rs1927902  | 9:120518991  | T | 0.0526  | 0.0070 | 0.27 | 1.2E-14 | 1452 |
| Insomnia | rs1937447  | 1:66358242   | C | -0.0387 | 0.0070 | 0.70 | 2.1E-08 | 836  |
| Insomnia | rs2030672  | 7:21687925   | C | 0.0344  | 0.0060 | 0.54 | 1.1E-08 | 783  |
| Insomnia | rs2089358  | 1:37194103   | T | -0.0408 | 0.0070 | 0.67 | 2.7E-10 | 986  |
| Insomnia | rs214934   | 11:17193475  | A | -0.0377 | 0.0060 | 0.33 | 3.2E-09 | 836  |
| Insomnia | rs2216427  | 3:180785697  | C | 0.0354  | 0.0060 | 0.68 | 1.6E-08 | 724  |
| Insomnia | rs2221119  | 11:88598444  | C | 0.0363  | 0.0060 | 0.47 | 2.0E-09 | 876  |
| Insomnia | rs224029   | 10:64519299  | T | -0.0387 | 0.0060 | 0.40 | 2.5E-10 | 962  |
| Insomnia | rs2286729  | 12:6873818   | A | 0.0695  | 0.0110 | 0.06 | 5.4E-11 | 747  |
| Insomnia | rs2364921  | 3:158522463  | T | -0.0336 | 0.0060 | 0.51 | 2.1E-08 | 749  |
| Insomnia | rs2388840  | 6:99598756   | A | -0.0367 | 0.0060 | 0.64 | 1.4E-09 | 826  |
| Insomnia | rs2389631  | 13:96932868  | A | -0.0398 | 0.0060 | 0.59 | 2.0E-10 | 1023 |
| Insomnia | rs2431108  | 5:103947968  | T | -0.0534 | 0.0060 | 0.70 | 7.8E-17 | 1605 |
| Insomnia | rs2598293  | 7:133989882  | T | 0.0354  | 0.0060 | 0.43 | 2.5E-09 | 816  |
| Insomnia | rs2737240  | 8:116657235  | A | 0.0363  | 0.0070 | 0.69 | 3.4E-08 | 752  |
| Insomnia | rs2792990  | 9:125621610  | C | 0.0545  | 0.0080 | 0.82 | 1.2E-10 | 1193 |
| Insomnia | rs2838787  | 21:46539725  | A | -0.0356 | 0.0060 | 0.38 | 7.7E-09 | 796  |
| Insomnia | rs28552587 | 8:103356226  | A | 0.0334  | 0.0060 | 0.63 | 3.3E-08 | 693  |
| Insomnia | rs28582096 | 12:123856998 | A | -0.0545 | 0.0070 | 0.21 | 1.7E-13 | 1323 |
| Insomnia | rs28611339 | 8:10170037   | T | 0.0583  | 0.0090 | 0.11 | 8.5E-11 | 858  |

|          |            |              |   |         |        |      |         |      |
|----------|------------|--------------|---|---------|--------|------|---------|------|
| Insomnia | rs2867690  | 20:41972028  | T | 0.0421  | 0.0080 | 0.18 | 3.7E-08 | 692  |
| Insomnia | rs3131638  | 6:31475127   | A | -0.0440 | 0.0070 | 0.28 | 7.9E-10 | 1048 |
| Insomnia | rs314281   | 6:105400605  | T | -0.0429 | 0.0060 | 0.44 | 6.0E-13 | 1206 |
| Insomnia | rs3184470  | 16:715164    | A | -0.0377 | 0.0060 | 0.47 | 9.7E-10 | 942  |
| Insomnia | rs324017   | 12:57487814  | A | 0.0392  | 0.0070 | 0.33 | 1.6E-09 | 901  |
| Insomnia | rs34214423 | 16:52303107  | A | 0.0450  | 0.0080 | 0.82 | 3.2E-09 | 793  |
| Insomnia | rs34490907 | 17:26933741  | C | 0.0535  | 0.0090 | 0.89 | 1.8E-08 | 734  |
| Insomnia | rs34967082 | 2:215382654  | A | 0.0354  | 0.0060 | 0.39 | 4.3E-09 | 795  |
| Insomnia | rs35110063 | 3:43066558   | A | 0.0392  | 0.0060 | 0.44 | 8.8E-11 | 1009 |
| Insomnia | rs35322724 | 16:77137324  | A | 0.0488  | 0.0060 | 0.52 | 3.7E-16 | 1584 |
| Insomnia | rs35539975 | 5:91607148   | A | 0.0421  | 0.0070 | 0.73 | 4.5E-09 | 929  |
| Insomnia | rs3774751  | 3:50209053   | T | -0.0408 | 0.0060 | 0.49 | 7.3E-12 | 1110 |
| Insomnia | rs3902952  | 16:61647589  | T | 0.0478  | 0.0080 | 0.22 | 2.6E-10 | 1040 |
| Insomnia | rs4090240  | 9:77118987   | T | -0.0387 | 0.0070 | 0.26 | 8.5E-09 | 761  |
| Insomnia | rs4238755  | 16:52746089  | A | -0.0429 | 0.0070 | 0.28 | 2.3E-10 | 998  |
| Insomnia | rs4260410  | 3:178469932  | T | 0.0344  | 0.0060 | 0.30 | 4.9E-08 | 667  |
| Insomnia | rs429358   | 19:45411941  | T | 0.0459  | 0.0080 | 0.83 | 2.1E-08 | 781  |
| Insomnia | rs4502882  | 5:153093998  | T | -0.0387 | 0.0060 | 0.69 | 8.0E-10 | 856  |
| Insomnia | rs4588900  | 8:73890425   | A | 0.0334  | 0.0060 | 0.52 | 1.6E-08 | 743  |
| Insomnia | rs4592425  | 11:62697813  | T | 0.0402  | 0.0060 | 0.72 | 4.3E-10 | 861  |
| Insomnia | rs4643373  | 17:47123423  | T | 0.0411  | 0.0070 | 0.72 | 1.6E-10 | 903  |
| Insomnia | rs4664299  | 2:160570033  | T | -0.0408 | 0.0070 | 0.22 | 4.9E-09 | 769  |
| Insomnia | rs4699157  | 4:106055212  | T | -0.0812 | 0.0150 | 0.97 | 4.0E-08 | 448  |
| Insomnia | rs4702     | 15:91426560  | A | -0.0481 | 0.0060 | 0.54 | 6.8E-16 | 1534 |
| Insomnia | rs4709655  | 6:163280204  | T | -0.0545 | 0.0090 | 0.09 | 3.1E-09 | 668  |
| Insomnia | rs4767645  | 12:118385788 | T | -0.0367 | 0.0060 | 0.53 | 6.5E-10 | 893  |
| Insomnia | rs4788203  | 16:29978827  | A | -0.0346 | 0.0060 | 0.41 | 6.3E-09 | 773  |
| Insomnia | rs4858708  | 3:25154112   | A | -0.0336 | 0.0060 | 0.55 | 1.2E-08 | 742  |



|          |            |              |   |         |        |      |         |      |
|----------|------------|--------------|---|---------|--------|------|---------|------|
| Insomnia | rs492858   | 3:155432229  | T | -0.0661 | 0.0110 | 0.10 | 3.5E-09 | 1006 |
| Insomnia | rs4981170  | 14:33412996  | A | -0.0545 | 0.0080 | 0.19 | 7.3E-13 | 1211 |
| Insomnia | rs521484   | 7:49894349   | A | -0.0398 | 0.0070 | 0.77 | 1.5E-08 | 741  |
| Insomnia | rs524859   | 11:66041079  | A | -0.0440 | 0.0060 | 0.32 | 1.5E-12 | 1125 |
| Insomnia | rs55772859 | 2:208042581  | A | 0.0421  | 0.0060 | 0.33 | 4.8E-11 | 1042 |
| Insomnia | rs55972276 | 5:135653737  | A | 0.0733  | 0.0090 | 0.10 | 4.2E-17 | 1313 |
| Insomnia | rs56097173 | 2:44262449   | T | 0.0402  | 0.0060 | 0.66 | 2.7E-10 | 966  |
| Insomnia | rs56133505 | 11:72348039  | A | 0.0411  | 0.0060 | 0.45 | 5.6E-12 | 1114 |
| Insomnia | rs566673   | 11:66401373  | T | -0.0387 | 0.0060 | 0.60 | 1.2E-10 | 960  |
| Insomnia | rs5877     | 1:173878862  | T | 0.0363  | 0.0060 | 0.68 | 1.2E-08 | 769  |
| Insomnia | rs6019663  | 20:47774512  | T | 0.0402  | 0.0070 | 0.30 | 6.5E-10 | 898  |
| Insomnia | rs60565673 | 18:52906830  | T | -0.0429 | 0.0060 | 0.63 | 1.6E-12 | 1150 |
| Insomnia | rs6119267  | 20:31163914  | C | -0.0598 | 0.0060 | 0.60 | 2.3E-20 | 2294 |
| Insomnia | rs61921611 | 12:66367726  | T | -0.0440 | 0.0060 | 0.69 | 7.8E-12 | 1106 |
| Insomnia | rs62068188 | 17:2400876   | T | 0.0488  | 0.0080 | 0.82 | 1.2E-09 | 921  |
| Insomnia | rs62158170 | 2:114082175  | A | 0.0658  | 0.0070 | 0.79 | 1.2E-19 | 1916 |
| Insomnia | rs62213452 | 2:210380152  | T | 0.0373  | 0.0070 | 0.25 | 2.4E-08 | 694  |
| Insomnia | rs62264767 | 3:117642005  | A | 0.0649  | 0.0080 | 0.81 | 1.6E-14 | 1720 |
| Insomnia | rs62301574 | 4:22050165   | C | -0.0419 | 0.0070 | 0.79 | 1.4E-08 | 777  |
| Insomnia | rs623025   | 1:201765094  | T | -0.0377 | 0.0070 | 0.25 | 3.2E-08 | 712  |
| Insomnia | rs62383308 | 5:165460085  | A | -0.0598 | 0.0110 | 0.07 | 4.0E-08 | 647  |
| Insomnia | rs62429521 | 6:140324582  | A | 0.0507  | 0.0080 | 0.19 | 1.8E-09 | 1040 |
| Insomnia | rs6457796  | 6:34828553   | T | -0.0387 | 0.0070 | 0.73 | 1.1E-08 | 788  |
| Insomnia | rs6465151  | 7:88310899   | T | 0.0564  | 0.0090 | 0.14 | 1.9E-09 | 1023 |
| Insomnia | rs647905   | 11:121534938 | T | 0.0334  | 0.0060 | 0.53 | 2.9E-08 | 742  |
| Insomnia | rs6510033  | 19:30710785  | A | -0.0367 | 0.0070 | 0.76 | 4.7E-08 | 657  |
| Insomnia | rs6545798  | 2:60521311   | A | -0.0408 | 0.0060 | 0.38 | 1.2E-11 | 1044 |
| Insomnia | rs6562066  | 13:60532796  | T | 0.0392  | 0.0060 | 0.43 | 1.4E-10 | 1006 |

|          |            |              |   |         |        |      |         |      |
|----------|------------|--------------|---|---------|--------|------|---------|------|
| Insomnia | rs6589988  | 11:99126016  | A | -0.0377 | 0.0060 | 0.72 | 4.7E-09 | 770  |
| Insomnia | rs6597649  | 9:133786652  | T | 0.0334  | 0.0060 | 0.44 | 3.1E-08 | 733  |
| Insomnia | rs6601080  | 5:179511043  | A | 0.0354  | 0.0060 | 0.64 | 2.2E-08 | 772  |
| Insomnia | rs6606731  | 12:109982578 | A | 0.0431  | 0.0080 | 0.16 | 1.5E-08 | 649  |
| Insomnia | rs66674044 | 16:19904344  | A | -0.0598 | 0.0090 | 0.87 | 2.2E-12 | 1045 |
| Insomnia | rs667730   | 11:83277325  | T | 0.0334  | 0.0060 | 0.60 | 2.3E-08 | 712  |
| Insomnia | rs6702604  | 1:107190062  | A | -0.0367 | 0.0060 | 0.56 | 1.3E-09 | 883  |
| Insomnia | rs670501   | 7:108625185  | T | 0.0526  | 0.0070 | 0.24 | 7.4E-13 | 1344 |
| Insomnia | rs671985   | 8:60914783   | A | -0.0377 | 0.0060 | 0.48 | 2.8E-10 | 945  |
| Insomnia | rs6734957  | 2:42813247   | T | -0.0419 | 0.0070 | 0.22 | 1.8E-09 | 811  |
| Insomnia | rs6756610  | 2:147480394  | C | 0.0373  | 0.0060 | 0.61 | 1.1E-09 | 878  |
| Insomnia | rs6808140  | 3:10581380   | T | 0.0392  | 0.0060 | 0.52 | 5.4E-11 | 1023 |
| Insomnia | rs6888135  | 5:141254063  | A | 0.0383  | 0.0060 | 0.49 | 1.2E-10 | 974  |
| Insomnia | rs694786   | 3:173112907  | T | -0.0440 | 0.0060 | 0.42 | 2.0E-13 | 1250 |
| Insomnia | rs6967168  | 7:132672192  | T | -0.0440 | 0.0070 | 0.74 | 1.4E-10 | 998  |
| Insomnia | rs6978112  | 7:1966841    | T | 0.0344  | 0.0060 | 0.40 | 2.1E-08 | 756  |
| Insomnia | rs699844   | 1:74878253   | A | 0.0602  | 0.0110 | 0.93 | 4.1E-08 | 624  |
| Insomnia | rs701394   | 5:80296487   | A | -0.0356 | 0.0060 | 0.64 | 6.8E-09 | 778  |
| Insomnia | rs7040224  | 9:134886837  | A | 0.0373  | 0.0060 | 0.31 | 4.2E-09 | 786  |
| Insomnia | rs7044885  | 9:81739348   | C | -0.0408 | 0.0060 | 0.49 | 5.7E-12 | 1109 |
| Insomnia | rs715338   | 15:57215867  | A | 0.0411  | 0.0060 | 0.59 | 7.9E-12 | 1089 |
| Insomnia | rs7168238  | 15:66709386  | C | 0.0639  | 0.0110 | 0.08 | 1.8E-08 | 842  |
| Insomnia | rs7214267  | 17:43157709  | A | -0.0440 | 0.0060 | 0.54 | 5.1E-13 | 1278 |
| Insomnia | rs72657797 | 4:90820809   | T | -0.0555 | 0.0080 | 0.13 | 1.5E-12 | 901  |
| Insomnia | rs72773790 | 9:139109080  | T | 0.0373  | 0.0060 | 0.69 | 3.7E-09 | 797  |
| Insomnia | rs728017   | 6:124292594  | A | -0.0346 | 0.0060 | 0.43 | 9.5E-09 | 780  |
| Insomnia | rs72820274 | 2:104412924  | A | 0.0344  | 0.0060 | 0.42 | 1.3E-08 | 768  |
| Insomnia | rs72899452 | 11:45415577  | T | 0.0742  | 0.0120 | 0.09 | 1.0E-09 | 1188 |

|          |            |             |   |         |        |      |         |      |
|----------|------------|-------------|---|---------|--------|------|---------|------|
| Insomnia | rs73671843 | 7:3520024   | A | -0.0555 | 0.0090 | 0.14 | 5.5E-10 | 969  |
| Insomnia | rs7402939  | 15:99183876 | T | -0.0356 | 0.0060 | 0.39 | 5.2E-09 | 801  |
| Insomnia | rs742760   | 20:50985290 | A | 0.0431  | 0.0080 | 0.83 | 2.5E-08 | 682  |
| Insomnia | rs7475916  | 10:77771194 | C | -0.0367 | 0.0060 | 0.37 | 6.7E-09 | 838  |
| Insomnia | rs75452188 | 2:67134426  | A | 0.0516  | 0.0090 | 0.89 | 1.6E-08 | 691  |
| Insomnia | rs7571486  | 2:176473295 | A | -0.0387 | 0.0070 | 0.27 | 1.4E-08 | 784  |
| Insomnia | rs75932578 | 7:106844694 | T | -0.0398 | 0.0070 | 0.19 | 4.2E-08 | 640  |
| Insomnia | rs7599697  | 2:239231477 | T | -0.0367 | 0.0060 | 0.34 | 5.0E-09 | 809  |
| Insomnia | rs76145129 | 20:62670427 | T | -0.0502 | 0.0090 | 0.11 | 2.7E-08 | 647  |
| Insomnia | rs7615602  | 3:18718055  | C | -0.0398 | 0.0070 | 0.32 | 2.6E-09 | 924  |
| Insomnia | rs7625896  | 3:44062561  | A | 0.0363  | 0.0060 | 0.65 | 5.3E-09 | 801  |
| Insomnia | rs77641763 | 9:140265782 | T | 0.0714  | 0.0090 | 0.21 | 6.5E-15 | 2262 |
| Insomnia | rs7992992  | 13:54721699 | A | 0.0507  | 0.0090 | 0.14 | 1.2E-08 | 825  |
| Insomnia | rs8076183  | 17:61024696 | T | -0.0377 | 0.0060 | 0.48 | 2.7E-10 | 944  |
| Insomnia | rs8180457  | 5:107209814 | T | -0.0555 | 0.0080 | 0.15 | 1.1E-11 | 1038 |
| Insomnia | rs8180817  | 7:114047542 | C | -0.0492 | 0.0060 | 0.46 | 1.8E-16 | 1602 |
| Insomnia | rs823247   | 2:2850540   | T | -0.0367 | 0.0060 | 0.46 | 5.3E-10 | 888  |
| Insomnia | rs830716   | 16:12323509 | C | 0.0450  | 0.0070 | 0.61 | 8.7E-12 | 1278 |
| Insomnia | rs871994   | 8:35190619  | A | 0.0354  | 0.0060 | 0.39 | 5.5E-09 | 794  |
| Insomnia | rs874168   | 8:30849450  | T | 0.0344  | 0.0060 | 0.56 | 8.0E-09 | 777  |
| Insomnia | rs908668   | 19:56134038 | T | 0.0497  | 0.0070 | 0.17 | 1.4E-11 | 943  |
| Insomnia | rs910187   | 20:45841052 | A | -0.0346 | 0.0060 | 0.35 | 1.6E-08 | 721  |
| Insomnia | rs9373590  | 6:101212001 | A | 0.0402  | 0.0060 | 0.54 | 2.2E-11 | 1068 |
| Insomnia | rs9394502  | 6:38452503  | T | -0.0545 | 0.0060 | 0.39 | 7.8E-18 | 1886 |
| Insomnia | rs9527083  | 13:53991125 | A | -0.0758 | 0.0060 | 0.66 | 1.6E-32 | 3465 |
| Insomnia | rs9540729  | 13:66947124 | A | 0.0363  | 0.0060 | 0.53 | 1.4E-09 | 875  |
| Insomnia | rs9563886  | 13:61720066 | T | -0.0336 | 0.0060 | 0.60 | 3.1E-08 | 720  |
| Insomnia | rs9889282  | 17:50259142 | A | -0.0419 | 0.0060 | 0.63 | 4.7E-12 | 1093 |

|          |            |              |   |         |        |      |         |      |
|----------|------------|--------------|---|---------|--------|------|---------|------|
| Insomnia | rs9931543  | 16:56128782  | T | 0.0478  | 0.0070 | 0.74 | 1.1E-12 | 1169 |
| Insomnia | rs9964420  | 18:56824041  | A | 0.0354  | 0.0070 | 0.29 | 4.5E-08 | 688  |
| Sports   | rs10946808 | 6:26233387   | G | 0.0300  | 0.0078 | 0.38 | 9.9E-10 | 149  |
| Sports   | rs159544   | 5:60489247   | G | 0.0300  | 0.0078 | 0.39 | 1.3E-09 | 150  |
| Sports   | rs166840   | 17:19799698  | G | 0.0300  | 0.0071 | 0.63 | 3.1E-11 | 147  |
| Sports   | rs62253088 | 3:85400801   | T | 0.0490  | 0.0082 | 0.31 | 1.0E-19 | 363  |
| Sports   | rs75930676 | 14:71826547  | C | 0.0730  | 0.0193 | 0.03 | 2.0E-09 | 126  |
| MVPA     | rs1160545  | 2:100832269  | T | 0.0249  | 0.0041 | 0.40 | 1.7E-09 | 196  |
| MVPA     | rs12357890 | 10:99762693  | A | 0.0225  | 0.0041 | 0.51 | 4.8E-08 | 167  |
| MVPA     | rs13201721 | 6:141799534  | T | 0.0255  | 0.0040 | 0.73 | 1.8E-10 | 169  |
| MVPA     | rs1625595  | 11:66078129  | T | -0.0213 | 0.0032 | 0.46 | 1.9E-11 | 149  |
| MVPA     | rs1691471  | 3:85011013   | T | 0.0379  | 0.0042 | 0.30 | 1.7E-19 | 400  |
| MVPA     | rs2290338  | 3:85362101   | T | -0.0257 | 0.0039 | 0.28 | 7.3E-11 | 176  |
| MVPA     | rs2668196  | 3:165502709  | A | -0.0227 | 0.0040 | 0.18 | 2.1E-08 | 99   |
| MVPA     | rs336620   | 3:18628793   | C | 0.0243  | 0.0044 | 0.35 | 4.0E-08 | 177  |
| MVPA     | rs385301   | 17:19806828  | T | -0.0284 | 0.0047 | 0.23 | 1.6E-09 | 187  |
| MVPA     | rs4546329  | 5:60589739   | T | -0.0181 | 0.0032 | 0.49 | 1.4E-08 | 108  |
| MVPA     | rs4865512  | 5:50661601   | A | 0.0240  | 0.0042 | 0.62 | 7.7E-09 | 179  |
| MVPA     | rs568546   | 11:107321156 | T | 0.0237  | 0.0041 | 0.51 | 5.9E-09 | 186  |
| MVPA     | rs6427178  | 1:169095082  | A | 0.0229  | 0.0041 | 0.50 | 1.7E-08 | 173  |
| MVPA     | rs7613360  | 3:49916710   | T | -0.0247 | 0.0042 | 0.31 | 2.8E-09 | 172  |
| MVPA     | rs9903845  | 17:50291181  | A | -0.0200 | 0.0034 | 0.26 | 6.1E-09 | 101  |
| VPA      | rs1248860  | 3:85015779   | A | 0.0410  | 0.0086 | 0.47 | 1.1E-13 | 219  |
| VPA      | rs13243553 | 7:133506955  | G | 0.0390  | 0.0094 | 0.62 | 9.0E-11 | 188  |
| VPA      | rs2764261  | 6:108927842  | A | 0.0390  | 0.0091 | 0.42 | 2.0E-11 | 194  |
| VPA      | rs328902   | 7:35020843   | T | 0.0410  | 0.0104 | 0.30 | 5.5E-10 | 183  |
| VPA      | rs3781411  | 10:126715436 | C | 0.0580  | 0.0145 | 0.84 | 3.0E-10 | 236  |

|                     |             |              |   |         |        |      |         |    |
|---------------------|-------------|--------------|---|---------|--------|------|---------|----|
| Sedentary behaviour | rs10041724  | 5:124273520  | T | 0.0180  | 0.0030 | 0.81 | 3.9E-11 | 40 |
| Sedentary behaviour | rs10054327  | 5:147871137  | G | 0.0170  | 0.0020 | 0.61 | 3.4E-15 | 56 |
| Sedentary behaviour | rs10145592  | 14:94287215  | C | -0.0150 | 0.0020 | 0.38 | 1.8E-11 | 43 |
| Sedentary behaviour | rs10189857  | 2:60713235   | A | -0.0210 | 0.0020 | 0.53 | 6.2E-21 | 90 |
| Sedentary behaviour | rs1022785   | 14:29571653  | G | 0.0180  | 0.0030 | 0.14 | 7.1E-09 | 33 |
| Sedentary behaviour | rs10234444  | 7:41828527   | G | 0.0160  | 0.0030 | 0.86 | 2.9E-08 | 25 |
| Sedentary behaviour | rs10246289  | 7:115544763  | A | 0.0190  | 0.0030 | 0.14 | 1.7E-08 | 35 |
| Sedentary behaviour | rs1031423   | 5:93276883   | T | -0.0190 | 0.0030 | 0.15 | 1.8E-12 | 38 |
| Sedentary behaviour | rs10427502  | 21:40654840  | G | 0.0140  | 0.0020 | 0.68 | 8.6E-10 | 35 |
| Sedentary behaviour | rs10737620  | 1:193057971  | T | 0.0140  | 0.0020 | 0.33 | 2.6E-09 | 35 |
| Sedentary behaviour | rs10771746  | 12:30791864  | C | -0.0140 | 0.0020 | 0.69 | 2.5E-09 | 34 |
| Sedentary behaviour | rs10772643  | 12:13415288  | C | 0.0250  | 0.0040 | 0.16 | 1.3E-12 | 69 |
| Sedentary behaviour | rs10876864  | 12:56401085  | G | -0.0130 | 0.0020 | 0.41 | 1.0E-09 | 34 |
| Sedentary behaviour | rs10890123  | 1:74802123   | C | 0.0140  | 0.0030 | 0.79 | 3.3E-08 | 26 |
| Sedentary behaviour | rs10932837  | 2:221044785  | C | -0.0130 | 0.0020 | 0.46 | 1.3E-09 | 34 |
| Sedentary behaviour | rs10940659  | 5:59360341   | A | -0.0130 | 0.0020 | 0.54 | 1.5E-08 | 34 |
| Sedentary behaviour | rs10994943  | 10:63591413  | T | 0.0130  | 0.0020 | 0.62 | 3.1E-09 | 33 |
| Sedentary behaviour | rs11020045  | 11:92487907  | A | -0.0130 | 0.0020 | 0.66 | 1.6E-08 | 31 |
| Sedentary behaviour | rs11130793  | 3:60884659   | C | 0.0130  | 0.0020 | 0.58 | 5.0E-09 | 34 |
| Sedentary behaviour | rs11201422  | 10:86924483  | T | 0.0130  | 0.0020 | 0.70 | 3.4E-08 | 29 |
| Sedentary behaviour | rs11218575  | 11:122154576 | C | 0.0150  | 0.0020 | 0.64 | 2.1E-12 | 43 |
| Sedentary behaviour | rs11245482  | 10:126733546 | T | -0.0130 | 0.0020 | 0.64 | 2.6E-09 | 32 |
| Sedentary behaviour | rs114328297 | 1:91190854   | T | 0.0140  | 0.0030 | 0.81 | 4.4E-08 | 25 |
| Sedentary behaviour | rs114600294 | 3:181419367  | G | -0.0160 | 0.0030 | 0.82 | 7.9E-10 | 31 |
| Sedentary behaviour | rs1156541   | 18:39952989  | C | 0.0150  | 0.0030 | 0.27 | 2.8E-08 | 36 |
| Sedentary behaviour | rs11654952  | 17:4813799   | T | -0.0170 | 0.0030 | 0.86 | 4.3E-08 | 29 |
| Sedentary behaviour | rs11657730  | 17:79372489  | C | 0.0130  | 0.0020 | 0.65 | 1.1E-08 | 32 |
| Sedentary behaviour | rs11689199  | 2:100820421  | A | 0.0190  | 0.0020 | 0.61 | 5.5E-17 | 71 |

|                     |             |              |   |         |        |      |         |    |
|---------------------|-------------|--------------|---|---------|--------|------|---------|----|
| Sedentary behaviour | rs11714337  | 3:71582521   | G | 0.0140  | 0.0020 | 0.61 | 4.7E-11 | 38 |
| Sedentary behaviour | rs11763734  | 7:126400910  | A | -0.0130 | 0.0020 | 0.50 | 8.2E-09 | 35 |
| Sedentary behaviour | rs11810109  | 1:44186812   | A | 0.0160  | 0.0020 | 0.69 | 5.4E-12 | 45 |
| Sedentary behaviour | rs12105701  | 2:41737200   | C | -0.0130 | 0.0020 | 0.33 | 5.4E-09 | 30 |
| Sedentary behaviour | rs12272012  | 11:84861286  | G | -0.0300 | 0.0050 | 0.97 | 1.9E-08 | 24 |
| Sedentary behaviour | rs12289262  | 11:12894758  | C | -0.0140 | 0.0020 | 0.77 | 2.0E-08 | 28 |
| Sedentary behaviour | rs1243182   | 10:21916728  | C | -0.0190 | 0.0020 | 0.70 | 2.0E-15 | 62 |
| Sedentary behaviour | rs12476388  | 2:116330983  | C | 0.0130  | 0.0020 | 0.67 | 2.1E-08 | 30 |
| Sedentary behaviour | rs12491503  | 3:165706855  | G | -0.0140 | 0.0020 | 0.69 | 5.5E-10 | 34 |
| Sedentary behaviour | rs12541615  | 8:118870151  | T | -0.0180 | 0.0030 | 0.75 | 3.9E-10 | 50 |
| Sedentary behaviour | rs12554512  | 9:23352293   | T | 0.0210  | 0.0020 | 0.58 | 3.8E-21 | 88 |
| Sedentary behaviour | rs12725114  | 1:62432641   | G | 0.0150  | 0.0030 | 0.79 | 1.6E-08 | 31 |
| Sedentary behaviour | rs1278847   | 1:110037483  | C | 0.0160  | 0.0020 | 0.70 | 1.2E-11 | 44 |
| Sedentary behaviour | rs13029509  | 2:215374209  | G | -0.0180 | 0.0020 | 0.57 | 2.0E-17 | 65 |
| Sedentary behaviour | rs13107325  | 4:103188709  | C | -0.0290 | 0.0040 | 0.95 | 1.5E-12 | 30 |
| Sedentary behaviour | rs138256022 | 3:11603090   | C | -0.0310 | 0.0060 | 0.97 | 2.9E-08 | 24 |
| Sedentary behaviour | rs141184308 | 9:86463339   | A | 0.0430  | 0.0080 | 0.99 | 2.6E-08 | 20 |
| Sedentary behaviour | rs1421334   | 8:30865733   | A | 0.0170  | 0.0020 | 0.44 | 2.2E-15 | 58 |
| Sedentary behaviour | rs1451533   | 2:105466005  | G | -0.0160 | 0.0020 | 0.67 | 6.7E-12 | 46 |
| Sedentary behaviour | rs17207890  | 11:95490754  | G | 0.0160  | 0.0020 | 0.73 | 1.1E-16 | 41 |
| Sedentary behaviour | rs17379561  | 1:98340139   | A | -0.0260 | 0.0030 | 0.80 | 7.0E-10 | 87 |
| Sedentary behaviour | rs17512836  | 18:53194961  | T | 0.0420  | 0.0070 | 0.97 | 3.1E-09 | 40 |
| Sedentary behaviour | rs17727474  | 10:127182959 | C | 0.0180  | 0.0030 | 0.82 | 1.4E-13 | 39 |
| Sedentary behaviour | rs17789218  | 6:100600097  | T | 0.0190  | 0.0030 | 0.79 | 8.6E-12 | 49 |
| Sedentary behaviour | rs2034768   | 3:93986371   | A | 0.0150  | 0.0020 | 0.46 | 5.9E-09 | 46 |
| Sedentary behaviour | rs2045147   | 10:56660437  | A | 0.0130  | 0.0020 | 0.42 | 1.5E-10 | 34 |
| Sedentary behaviour | rs2073869   | 9:135763816  | C | 0.0190  | 0.0030 | 0.75 | 1.3E-08 | 55 |
| Sedentary behaviour | rs2092829   | 22:31780514  | G | 0.0140  | 0.0020 | 0.72 | 1.1E-08 | 32 |

|                     |            |              |   |         |        |      |         |     |
|---------------------|------------|--------------|---|---------|--------|------|---------|-----|
| Sedentary behaviour | rs2164744  | 12:109872039 | T | -0.0130 | 0.0020 | 0.65 | 4.6E-09 | 31  |
| Sedentary behaviour | rs2173650  | 12:117525235 | G | 0.0180  | 0.0030 | 0.85 | 3.0E-09 | 34  |
| Sedentary behaviour | rs2184364  | 6:143183596  | A | 0.0160  | 0.0030 | 0.78 | 6.8E-12 | 36  |
| Sedentary behaviour | rs2447098  | 17:2277720   | C | -0.0150 | 0.0020 | 0.45 | 5.0E-10 | 46  |
| Sedentary behaviour | rs2460     | 15:53073084  | G | -0.0150 | 0.0030 | 0.78 | 2.9E-10 | 32  |
| Sedentary behaviour | rs2584597  | 17:61941284  | T | 0.0150  | 0.0020 | 0.74 | 2.9E-14 | 36  |
| Sedentary behaviour | rs2616830  | 9:1721385    | G | 0.0170  | 0.0020 | 0.42 | 3.2E-15 | 57  |
| Sedentary behaviour | rs262890   | 5:62930015   | A | -0.0190 | 0.0020 | 0.65 | 1.5E-08 | 68  |
| Sedentary behaviour | rs2717559  | 8:143882420  | A | 0.0120  | 0.0020 | 0.56 | 1.2E-08 | 29  |
| Sedentary behaviour | rs2787374  | 9:103054951  | T | 0.0130  | 0.0020 | 0.48 | 2.7E-10 | 34  |
| Sedentary behaviour | rs303753   | 18:21074922  | G | -0.0150 | 0.0020 | 0.66 | 1.4E-09 | 41  |
| Sedentary behaviour | rs34864022 | 9:22609110   | A | -0.0260 | 0.0040 | 0.94 | 3.0E-08 | 29  |
| Sedentary behaviour | rs35574015 | 16:15146061  | T | -0.0130 | 0.0020 | 0.69 | 5.5E-16 | 29  |
| Sedentary behaviour | rs374722   | 2:147839830  | G | 0.0250  | 0.0030 | 0.18 | 4.8E-12 | 74  |
| Sedentary behaviour | rs3754970  | 2:162091836  | T | -0.0150 | 0.0020 | 0.54 | 3.2E-33 | 46  |
| Sedentary behaviour | rs3796386  | 3:49899795   | G | -0.0260 | 0.0020 | 0.66 | 2.8E-09 | 124 |
| Sedentary behaviour | rs405797   | 14:26972834  | T | -0.0150 | 0.0030 | 0.24 | 7.3E-09 | 34  |
| Sedentary behaviour | rs42210    | 5:166408788  | G | -0.0140 | 0.0020 | 0.34 | 2.1E-08 | 36  |
| Sedentary behaviour | rs4334769  | 4:130245233  | G | 0.0120  | 0.0020 | 0.47 | 6.7E-09 | 29  |
| Sedentary behaviour | rs4382592  | 9:134870755  | T | 0.0140  | 0.0020 | 0.30 | 5.0E-10 | 34  |
| Sedentary behaviour | rs4523073  | 6:67550288   | A | -0.0140 | 0.0020 | 0.64 | 1.6E-13 | 37  |
| Sedentary behaviour | rs4577309  | 2:191288833  | A | 0.0160  | 0.0020 | 0.53 | 2.9E-08 | 52  |
| Sedentary behaviour | rs4675246  | 2:202864487  | G | -0.0150 | 0.0030 | 0.74 | 4.7E-09 | 35  |
| Sedentary behaviour | rs4775373  | 15:61476936  | T | 0.0130  | 0.0020 | 0.34 | 1.3E-12 | 31  |
| Sedentary behaviour | rs4845364  | 1:154141908  | A | -0.0150 | 0.0020 | 0.45 | 1.4E-08 | 46  |
| Sedentary behaviour | rs4937842  | 11:133734542 | G | -0.0130 | 0.0020 | 0.61 | 1.0E-09 | 33  |
| Sedentary behaviour | rs4973576  | 2:233806771  | C | -0.0150 | 0.0020 | 0.29 | 2.1E-09 | 38  |
| Sedentary behaviour | rs55700114 | 20:43717080  | G | -0.0140 | 0.0020 | 0.64 | 2.4E-09 | 37  |

|                     |            |              |   |         |        |      |         |    |
|---------------------|------------|--------------|---|---------|--------|------|---------|----|
| Sedentary behaviour | rs55909997 | 1:107581039  | G | -0.0140 | 0.0020 | 0.67 | 3.8E-10 | 36 |
| Sedentary behaviour | rs56103247 | 20:62483184  | C | 0.0300  | 0.0050 | 0.96 | 3.4E-10 | 31 |
| Sedentary behaviour | rs56858768 | 13:86511730  | G | -0.0150 | 0.0020 | 0.65 | 4.3E-09 | 42 |
| Sedentary behaviour | rs57585211 | 5:107197725  | T | -0.0170 | 0.0030 | 0.84 | 3.1E-13 | 33 |
| Sedentary behaviour | rs6131281  | 20:11891724  | C | 0.0160  | 0.0020 | 0.60 | 1.3E-09 | 50 |
| Sedentary behaviour | rs6141814  | 20:31368960  | C | -0.0140 | 0.0020 | 0.61 | 7.8E-10 | 38 |
| Sedentary behaviour | rs62379379 | 5:141082015  | G | -0.0260 | 0.0040 | 0.91 | 7.0E-10 | 44 |
| Sedentary behaviour | rs62641636 | 2:68425427   | A | 0.0140  | 0.0020 | 0.66 | 1.8E-09 | 36 |
| Sedentary behaviour | rs6472942  | 8:76827190   | T | -0.0130 | 0.0020 | 0.60 | 2.2E-11 | 33 |
| Sedentary behaviour | rs6673341  | 1:184655649  | T | -0.0150 | 0.0020 | 0.43 | 7.9E-12 | 45 |
| Sedentary behaviour | rs66852340 | 4:3311070    | C | -0.0180 | 0.0030 | 0.77 | 1.7E-10 | 47 |
| Sedentary behaviour | rs6721975  | 2:5832667    | T | -0.0170 | 0.0030 | 0.29 | 1.7E-13 | 49 |
| Sedentary behaviour | rs6797840  | 3:85656569   | A | -0.0160 | 0.0020 | 0.48 | 4.9E-15 | 52 |
| Sedentary behaviour | rs6825241  | 4:152543783  | C | -0.0170 | 0.0020 | 0.57 | 1.1E-10 | 58 |
| Sedentary behaviour | rs6850494  | 4:82291771   | A | -0.0140 | 0.0020 | 0.60 | 8.5E-18 | 39 |
| Sedentary behaviour | rs6905544  | 6:98411631   | A | -0.0190 | 0.0020 | 0.34 | 1.0E-09 | 66 |
| Sedentary behaviour | rs6973656  | 7:77422583   | A | -0.0140 | 0.0020 | 0.63 | 3.5E-08 | 37 |
| Sedentary behaviour | rs6996198  | 8:65463442   | C | -0.0160 | 0.0030 | 0.83 | 2.4E-09 | 30 |
| Sedentary behaviour | rs7089973  | 10:116569565 | C | -0.0130 | 0.0020 | 0.63 | 2.3E-08 | 32 |
| Sedentary behaviour | rs7157001  | 14:99749484  | A | -0.0140 | 0.0030 | 0.71 | 6.3E-10 | 33 |
| Sedentary behaviour | rs71658797 | 1:77967507   | T | -0.0200 | 0.0030 | 0.88 | 8.2E-13 | 34 |
| Sedentary behaviour | rs7184800  | 16:53509131  | G | 0.0170  | 0.0020 | 0.73 | 3.4E-11 | 46 |
| Sedentary behaviour | rs7189927  | 16:28913787  | T | 0.0150  | 0.0020 | 0.37 | 3.4E-10 | 43 |
| Sedentary behaviour | rs7248205  | 19:10770305  | C | 0.0140  | 0.0020 | 0.41 | 4.5E-08 | 39 |
| Sedentary behaviour | rs72671494 | 8:93195457   | T | -0.0170 | 0.0030 | 0.88 | 3.0E-12 | 25 |
| Sedentary behaviour | rs72781699 | 2:24277709   | G | -0.0190 | 0.0030 | 0.83 | 4.9E-09 | 41 |
| Sedentary behaviour | rs72828890 | 5:167806836  | C | 0.0190  | 0.0030 | 0.89 | 2.7E-13 | 30 |
| Sedentary behaviour | rs72834698 | 6:26176517   | G | 0.0230  | 0.0030 | 0.87 | 2.7E-12 | 47 |



|                     |            |              |   |         |        |      |         |     |
|---------------------|------------|--------------|---|---------|--------|------|---------|-----|
| Sedentary behaviour | rs749671   | 16:31088347  | G | 0.0160  | 0.0020 | 0.62 | 2.8E-11 | 49  |
| Sedentary behaviour | rs7564130  | 2:50606642   | T | -0.0150 | 0.0020 | 0.60 | 1.7E-10 | 44  |
| Sedentary behaviour | rs7693082  | 4:159857819  | G | 0.0150  | 0.0020 | 0.26 | 2.7E-09 | 36  |
| Sedentary behaviour | rs7693703  | 4:118357405  | G | 0.0230  | 0.0040 | 0.89 | 1.9E-11 | 42  |
| Sedentary behaviour | rs7700107  | 4:17880416   | A | -0.0210 | 0.0030 | 0.88 | 3.6E-09 | 37  |
| Sedentary behaviour | rs7716447  | 5:88800331   | A | -0.0130 | 0.0020 | 0.76 | 1.5E-08 | 25  |
| Sedentary behaviour | rs77215114 | 4:45187658   | A | 0.0240  | 0.0040 | 0.91 | 1.1E-10 | 39  |
| Sedentary behaviour | rs7991062  | 13:100713194 | C | -0.0180 | 0.0020 | 0.63 | 7.3E-14 | 62  |
| Sedentary behaviour | rs801733   | 11:65934549  | A | 0.0170  | 0.0020 | 0.69 | 3.4E-08 | 51  |
| Sedentary behaviour | rs8043253  | 15:41503730  | C | -0.0120 | 0.0020 | 0.62 | 5.3E-10 | 28  |
| Sedentary behaviour | rs8756     | 12:66359752  | C | -0.0140 | 0.0020 | 0.49 | 1.5E-09 | 40  |
| Sedentary behaviour | rs9471333  | 6:40362023   | C | 0.0130  | 0.0020 | 0.53 | 4.3E-11 | 34  |
| Sedentary behaviour | rs9563168  | 13:54247827  | G | 0.0180  | 0.0030 | 0.78 | 3.4E-10 | 45  |
| Sedentary behaviour | rs9569734  | 13:58319476  | A | 0.0190  | 0.0030 | 0.81 | 9.3E-19 | 45  |
| Sedentary behaviour | rs9718104  | 6:166170539  | T | -0.0410 | 0.0050 | 0.92 | 1.5E-08 | 96  |
| Sedentary behaviour | rs973734   | 7:89387578   | C | 0.0170  | 0.0030 | 0.21 | 3.3E-09 | 39  |
| Sedentary behaviour | rs9834970  | 3:36856030   | T | 0.0130  | 0.0020 | 0.55 | 4.1E-11 | 34  |
| Sedentary behaviour | rs984409   | 1:67020440   | G | -0.0150 | 0.0020 | 0.35 | 3.9E-12 | 42  |
| Sedentary behaviour | rs9867121  | 3:114631548  | C | 0.0200  | 0.0030 | 0.81 | 4.5E-11 | 50  |
| Sedentary behaviour | rs9902312  | 17:65070304  | T | 0.0150  | 0.0020 | 0.64 | 3.3E-14 | 42  |
| Sedentary behaviour | rs9964724  | 18:35159124  | C | 0.0180  | 0.0020 | 0.30 | 6.6E-12 | 55  |
| Leisure screen time | rs10041724 | 5:124273520  | T | 0.0249  | 0.0044 | 0.81 | 1.5E-08 | 125 |
| Leisure screen time | rs1017550  | 10:63587683  | A | 0.0196  | 0.0035 | 0.67 | 2.9E-08 | 112 |
| Leisure screen time | rs10189857 | 2:60713235   | A | -0.0274 | 0.0035 | 0.53 | 7.8E-15 | 248 |
| Leisure screen time | rs10222987 | 4:185946130  | A | -0.0209 | 0.0036 | 0.63 | 9.0E-09 | 134 |
| Leisure screen time | rs10253861 | 7:8110475    | A | -0.0198 | 0.0035 | 0.49 | 1.5E-08 | 130 |
| Leisure screen time | rs10400776 | 14:97326366  | A | -0.0259 | 0.0044 | 0.23 | 3.4E-09 | 156 |
| Leisure screen time | rs10469911 | 2:49989127   | T | 0.0204  | 0.0037 | 0.72 | 4.8E-08 | 111 |

|                     |             |              |   |         |        |      |         |     |
|---------------------|-------------|--------------|---|---------|--------|------|---------|-----|
| Leisure screen time | rs10765775  | 11:95656362  | A | -0.0223 | 0.0039 | 0.30 | 9.8E-09 | 139 |
| Leisure screen time | rs10772643  | 12:13415288  | T | -0.0385 | 0.0062 | 0.84 | 5.9E-10 | 265 |
| Leisure screen time | rs10889193  | 1:61106174   | A | 0.0243  | 0.0039 | 0.64 | 4.9E-10 | 180 |
| Leisure screen time | rs10947452  | 6:33803752   | T | 0.0220  | 0.0040 | 0.35 | 4.9E-08 | 145 |
| Leisure screen time | rs11074658  | 16:10308335  | T | -0.0239 | 0.0039 | 0.64 | 9.2E-10 | 174 |
| Leisure screen time | rs114590429 | 2:166176789  | A | 0.0376  | 0.0060 | 0.15 | 3.0E-10 | 237 |
| Leisure screen time | rs11587591  | 1:209762875  | A | 0.0219  | 0.0039 | 0.74 | 2.2E-08 | 121 |
| Leisure screen time | rs1188887   | 6:139257866  | T | 0.0258  | 0.0041 | 0.63 | 2.5E-10 | 205 |
| Leisure screen time | rs11972285  | 7:99025591   | A | 0.0384  | 0.0056 | 0.78 | 5.1E-12 | 333 |
| Leisure screen time | rs12062845  | 1:98342685   | A | 0.0281  | 0.0042 | 0.27 | 2.4E-11 | 204 |
| Leisure screen time | rs12188899  | 5:59670706   | A | -0.0274 | 0.0048 | 0.80 | 1.1E-08 | 157 |
| Leisure screen time | rs12206846  | 6:108238917  | A | 0.0199  | 0.0036 | 0.40 | 2.1E-08 | 126 |
| Leisure screen time | rs12214364  | 6:67556372   | T | -0.0197 | 0.0036 | 0.62 | 4.9E-08 | 120 |
| Leisure screen time | rs12324720  | 15:64092140  | A | -0.0271 | 0.0046 | 0.21 | 3.5E-09 | 162 |
| Leisure screen time | rs12425850  | 12:123501972 | T | -0.0236 | 0.0039 | 0.30 | 1.4E-09 | 154 |
| Leisure screen time | rs12463321  | 19:37651855  | A | -0.0317 | 0.0055 | 0.16 | 7.0E-09 | 177 |
| Leisure screen time | rs12481468  | 20:43532438  | T | -0.0225 | 0.0039 | 0.75 | 8.6E-09 | 124 |
| Leisure screen time | rs12617870  | 2:193746283  | T | 0.0263  | 0.0035 | 0.57 | 6.6E-14 | 225 |
| Leisure screen time | rs12678836  | 8:92690148   | A | 0.0232  | 0.0035 | 0.41 | 5.4E-11 | 173 |
| Leisure screen time | rs12962050  | 18:35179808  | A | -0.0234 | 0.0036 | 0.67 | 1.2E-10 | 161 |
| Leisure screen time | rs12981974  | 19:19388071  | C | 0.0337  | 0.0058 | 0.18 | 8.6E-09 | 223 |
| Leisure screen time | rs12992995  | 2:175197545  | A | -0.0258 | 0.0043 | 0.26 | 2.1E-09 | 169 |
| Leisure screen time | rs13017586  | 2:147847198  | A | -0.0401 | 0.0054 | 0.83 | 8.3E-14 | 297 |
| Leisure screen time | rs13107325  | 4:103188709  | T | 0.0404  | 0.0067 | 0.05 | 1.8E-09 | 95  |
| Leisure screen time | rs13168806  | 5:120071604  | A | 0.0225  | 0.0040 | 0.40 | 1.5E-08 | 161 |
| Leisure screen time | rs13188731  | 5:7387097    | A | 0.0218  | 0.0040 | 0.32 | 4.5E-08 | 137 |
| Leisure screen time | rs13235840  | 7:133505091  | A | -0.0313 | 0.0050 | 0.81 | 3.5E-10 | 197 |
| Leisure screen time | rs13301354  | 9:139924637  | T | -0.0211 | 0.0037 | 0.37 | 1.2E-08 | 138 |

|                     |            |             |   |         |        |      |         |     |
|---------------------|------------|-------------|---|---------|--------|------|---------|-----|
| Leisure screen time | rs1362910  | 8:30856464  | A | 0.0253  | 0.0035 | 0.40 | 1.0E-12 | 204 |
| Leisure screen time | rs1375561  | 3:85658230  | T | 0.0232  | 0.0037 | 0.61 | 2.6E-10 | 169 |
| Leisure screen time | rs1391954  | 11:88575965 | T | 0.0245  | 0.0040 | 0.49 | 1.5E-09 | 199 |
| Leisure screen time | rs1483796  | 7:49871114  | A | -0.0199 | 0.0036 | 0.37 | 2.1E-08 | 122 |
| Leisure screen time | rs16825228 | 2:146346331 | A | -0.0193 | 0.0035 | 0.52 | 4.1E-08 | 123 |
| Leisure screen time | rs16896229 | 4:18002583  | T | 0.0300  | 0.0051 | 0.12 | 3.8E-09 | 124 |
| Leisure screen time | rs17025214 | 3:88023541  | T | -0.0221 | 0.0038 | 0.28 | 4.3E-09 | 131 |
| Leisure screen time | rs1736523  | 1:3079885   | C | 0.0216  | 0.0039 | 0.55 | 2.8E-08 | 153 |
| Leisure screen time | rs17621391 | 7:140176596 | T | 0.0243  | 0.0041 | 0.76 | 2.1E-09 | 143 |
| Leisure screen time | rs17801257 | 20:58892520 | A | -0.0292 | 0.0053 | 0.17 | 2.9E-08 | 159 |
| Leisure screen time | rs1802669  | 10:21827796 | A | 0.0384  | 0.0041 | 0.32 | 2.4E-21 | 424 |
| Leisure screen time | rs1837687  | 2:191238799 | C | 0.0222  | 0.0039 | 0.65 | 1.8E-08 | 148 |
| Leisure screen time | rs1860337  | 17:60851559 | T | -0.0253 | 0.0039 | 0.58 | 9.1E-11 | 206 |
| Leisure screen time | rs1938450  | 1:68359482  | A | -0.0226 | 0.0041 | 0.28 | 2.7E-08 | 135 |
| Leisure screen time | rs1947066  | 5:161101615 | A | 0.0298  | 0.0044 | 0.80 | 8.5E-12 | 188 |
| Leisure screen time | rs197439   | 1:112280990 | A | -0.0259 | 0.0039 | 0.56 | 3.3E-11 | 219 |
| Leisure screen time | rs1999065  | 9:120514574 | T | 0.0249  | 0.0037 | 0.37 | 1.2E-11 | 192 |
| Leisure screen time | rs2344451  | 5:93000224  | C | -0.0265 | 0.0047 | 0.15 | 1.6E-08 | 118 |
| Leisure screen time | rs2473977  | 6:113454213 | A | 0.0195  | 0.0036 | 0.46 | 4.6E-08 | 125 |
| Leisure screen time | rs249960   | 5:96164771  | A | 0.0298  | 0.0050 | 0.80 | 2.4E-09 | 186 |
| Leisure screen time | rs2529484  | 7:111180444 | C | 0.0221  | 0.0036 | 0.38 | 1.4E-09 | 152 |
| Leisure screen time | rs262890   | 5:62930015  | A | -0.0344 | 0.0042 | 0.65 | 2.1E-16 | 359 |
| Leisure screen time | rs2667382  | 15:83545977 | A | 0.0224  | 0.0039 | 0.46 | 6.7E-09 | 165 |
| Leisure screen time | rs2783992  | 9:1722044   | T | -0.0242 | 0.0038 | 0.58 | 3.4E-10 | 189 |
| Leisure screen time | rs28458909 | 9:140257189 | T | 0.0364  | 0.0059 | 0.21 | 5.5E-10 | 291 |
| Leisure screen time | rs2964252  | 5:152067929 | A | -0.0235 | 0.0037 | 0.34 | 3.2E-10 | 164 |
| Leisure screen time | rs2965216  | 19:13071082 | A | 0.0212  | 0.0039 | 0.49 | 4.6E-08 | 149 |
| Leisure screen time | rs34811474 | 4:25408838  | A | -0.0249 | 0.0045 | 0.22 | 4.5E-08 | 140 |

|                     |             |              |   |         |        |      |         |     |
|---------------------|-------------|--------------|---|---------|--------|------|---------|-----|
| Leisure screen time | rs34864022  | 9:22609110   | A | -0.0483 | 0.0078 | 0.94 | 4.7E-10 | 164 |
| Leisure screen time | rs35039375  | 1:171516863  | A | -0.0411 | 0.0066 | 0.92 | 6.3E-10 | 162 |
| Leisure screen time | rs36079846  | 2:215367159  | T | -0.0239 | 0.0038 | 0.57 | 4.5E-10 | 186 |
| Leisure screen time | rs364789    | 5:77387439   | A | 0.0275  | 0.0044 | 0.80 | 2.8E-10 | 158 |
| Leisure screen time | rs3759344   | 12:6862646   | A | 0.0452  | 0.0062 | 0.08 | 4.3E-13 | 202 |
| Leisure screen time | rs3781412   | 10:126715154 | A | -0.0208 | 0.0036 | 0.62 | 8.4E-09 | 135 |
| Leisure screen time | rs3791033   | 1:44134077   | T | 0.0331  | 0.0041 | 0.67 | 3.7E-16 | 320 |
| Leisure screen time | rs3853705   | 2:44261892   | T | 0.0228  | 0.0040 | 0.67 | 1.4E-08 | 151 |
| Leisure screen time | rs396321    | 5:112113735  | T | -0.0213 | 0.0035 | 0.50 | 1.3E-09 | 150 |
| Leisure screen time | rs421151    | 8:73462574   | A | -0.0360 | 0.0063 | 0.90 | 1.1E-08 | 158 |
| Leisure screen time | rs4303732   | 2:100830040  | T | 0.0265  | 0.0035 | 0.60 | 5.4E-14 | 222 |
| Leisure screen time | rs4311996   | 10:103735978 | A | -0.0217 | 0.0039 | 0.39 | 3.6E-08 | 148 |
| Leisure screen time | rs4416502   | 4:77030872   | A | 0.0291  | 0.0048 | 0.25 | 1.4E-09 | 208 |
| Leisure screen time | rs4460001   | 4:130275243  | A | -0.0193 | 0.0035 | 0.43 | 4.5E-08 | 121 |
| Leisure screen time | rs4483592   | 11:65990439  | T | 0.0360  | 0.0052 | 0.18 | 4.0E-12 | 250 |
| Leisure screen time | rs4551799   | 11:71416091  | A | -0.0241 | 0.0039 | 0.32 | 6.9E-10 | 168 |
| Leisure screen time | rs469565    | 22:29952437  | T | -0.0259 | 0.0046 | 0.78 | 1.5E-08 | 154 |
| Leisure screen time | rs4889530   | 16:31065918  | A | -0.0253 | 0.0039 | 0.38 | 1.3E-10 | 199 |
| Leisure screen time | rs558134    | 6:12693454   | T | -0.0225 | 0.0036 | 0.42 | 5.0E-10 | 163 |
| Leisure screen time | rs56151256  | 15:78024806  | A | 0.0285  | 0.0044 | 0.80 | 1.2E-10 | 175 |
| Leisure screen time | rs566017137 | 2:157149797  | C | -0.0656 | 0.0108 | 0.97 | 1.2E-09 | 181 |
| Leisure screen time | rs57092155  | 7:53856368   | T | -0.0268 | 0.0047 | 0.77 | 8.8E-09 | 171 |
| Leisure screen time | rs58087899  | 1:1863026    | A | -0.0222 | 0.0040 | 0.46 | 4.3E-08 | 162 |
| Leisure screen time | rs58541850  | 6:166165563  | A | 0.0522  | 0.0082 | 0.07 | 1.7E-10 | 241 |
| Leisure screen time | rs6010651   | 20:62418243  | A | 0.0235  | 0.0040 | 0.62 | 3.3E-09 | 173 |
| Leisure screen time | rs60603116  | 2:217431561  | A | -0.0226 | 0.0039 | 0.59 | 6.4E-09 | 163 |
| Leisure screen time | rs6073637   | 20:43714051  | A | -0.0225 | 0.0038 | 0.45 | 4.6E-09 | 166 |
| Leisure screen time | rs6102913   | 20:41202958  | T | -0.0193 | 0.0035 | 0.55 | 3.0E-08 | 122 |

|                     |            |              |   |         |        |      |         |     |
|---------------------|------------|--------------|---|---------|--------|------|---------|-----|
| Leisure screen time | rs61166637 | 4:140771814  | C | 0.0242  | 0.0043 | 0.75 | 1.5E-08 | 147 |
| Leisure screen time | rs61813324 | 1:156049877  | T | 0.0310  | 0.0057 | 0.15 | 4.4E-08 | 162 |
| Leisure screen time | rs62068672 | 16:89647015  | T | 0.0263  | 0.0048 | 0.73 | 4.1E-08 | 181 |
| Leisure screen time | rs62134209 | 2:45093457   | A | 0.0538  | 0.0091 | 0.95 | 3.3E-09 | 167 |
| Leisure screen time | rs62151809 | 2:104433256  | T | 0.0228  | 0.0039 | 0.44 | 3.9E-09 | 170 |
| Leisure screen time | rs62244886 | 3:71587392   | C | 0.0239  | 0.0039 | 0.64 | 1.2E-09 | 175 |
| Leisure screen time | rs6457816  | 6:35362848   | T | -0.0414 | 0.0070 | 0.94 | 4.0E-09 | 130 |
| Leisure screen time | rs6674314  | 1:243920895  | A | 0.0274  | 0.0049 | 0.78 | 2.3E-08 | 172 |
| Leisure screen time | rs6685030  | 1:171805284  | A | -0.0217 | 0.0035 | 0.45 | 5.3E-10 | 154 |
| Leisure screen time | rs68049022 | 10:66407019  | T | 0.0314  | 0.0048 | 0.83 | 6.2E-11 | 186 |
| Leisure screen time | rs6857     | 19:45392254  | T | -0.0369 | 0.0047 | 0.18 | 5.8E-15 | 267 |
| Leisure screen time | rs71658797 | 1:77967507   | A | 0.0373  | 0.0058 | 0.12 | 1.8E-10 | 192 |
| Leisure screen time | rs7236799  | 18:41627516  | A | 0.0242  | 0.0041 | 0.31 | 4.9E-09 | 167 |
| Leisure screen time | rs72671494 | 8:93195457   | T | -0.0349 | 0.0056 | 0.88 | 5.7E-10 | 168 |
| Leisure screen time | rs73405293 | 12:117522917 | A | -0.0308 | 0.0054 | 0.15 | 1.3E-08 | 161 |
| Leisure screen time | rs73420302 | 17:77768068  | C | -0.0300 | 0.0051 | 0.25 | 3.0E-09 | 222 |
| Leisure screen time | rs7430216  | 3:75201030   | T | 0.0250  | 0.0042 | 0.23 | 2.5E-09 | 149 |
| Leisure screen time | rs7432837  | 3:93809151   | T | -0.0235 | 0.0040 | 0.74 | 3.2E-09 | 142 |
| Leisure screen time | rs743699   | 4:3305116    | A | -0.0267 | 0.0044 | 0.73 | 1.2E-09 | 185 |
| Leisure screen time | rs74996610 | 12:24075007  | C | -0.0513 | 0.0093 | 0.95 | 3.1E-08 | 156 |
| Leisure screen time | rs7579662  | 2:161915810  | A | 0.0216  | 0.0039 | 0.38 | 4.1E-08 | 145 |
| Leisure screen time | rs7615206  | 3:49937505   | T | -0.0345 | 0.0035 | 0.66 | 1.5E-22 | 354 |
| Leisure screen time | rs76267866 | 3:70540347   | A | -0.0297 | 0.0047 | 0.81 | 3.5E-10 | 182 |
| Leisure screen time | rs7627290  | 3:165711001  | A | -0.0231 | 0.0039 | 0.56 | 2.4E-09 | 174 |
| Leisure screen time | rs76602404 | 7:50737835   | T | -0.0266 | 0.0049 | 0.21 | 4.4E-08 | 157 |
| Leisure screen time | rs78140587 | 18:41817809  | A | 0.0615  | 0.0099 | 0.97 | 5.8E-10 | 162 |
| Leisure screen time | rs7821826  | 8:10769439   | T | 0.0207  | 0.0035 | 0.46 | 3.3E-09 | 141 |
| Leisure screen time | rs78394231 | 6:107649123  | T | -0.0381 | 0.0065 | 0.90 | 3.5E-09 | 176 |

|                     |           |              |   |         |        |      |         |     |
|---------------------|-----------|--------------|---|---------|--------|------|---------|-----|
| Leisure screen time | rs7875078 | 9:14494845   | A | 0.0204  | 0.0035 | 0.51 | 7.4E-09 | 138 |
| Leisure screen time | rs7969719 | 12:109883577 | T | 0.0271  | 0.0037 | 0.27 | 4.5E-13 | 192 |
| Leisure screen time | rs7991062 | 13:100713194 | C | -0.0335 | 0.0041 | 0.63 | 1.3E-16 | 347 |
| Leisure screen time | rs841020  | 10:125409953 | T | 0.0269  | 0.0044 | 0.25 | 1.1E-09 | 180 |
| Leisure screen time | rs892087  | 19:10794793  | T | -0.0284 | 0.0040 | 0.64 | 1.0E-12 | 245 |
| Leisure screen time | rs9278004 | 6:33319815   | A | 0.0394  | 0.0057 | 0.11 | 3.2E-12 | 195 |
| Leisure screen time | rs9423279 | 10:125680419 | C | 0.0230  | 0.0041 | 0.40 | 2.5E-08 | 168 |
| Leisure screen time | rs9513416 | 13:99055774  | A | 0.0281  | 0.0048 | 0.87 | 4.1E-09 | 119 |
| Leisure screen time | rs9821299 | 3:83068067   | A | 0.0285  | 0.0048 | 0.19 | 3.6E-09 | 167 |
| Leisure screen time | rs9867121 | 3:114631548  | A | -0.0317 | 0.0050 | 0.19 | 2.0E-10 | 203 |

**Supplemental Table 5.** Sample overlap between used GWAS data sources.

| Trait                   | Overlapping         |      |
|-------------------------|---------------------|------|
|                         | Circulating protein | CAD  |
| Circulating protein     | /                   | 0    |
| Body mass index         | 0                   | 0    |
| Waist-to-hip ratio      | 0                   | 0    |
| Visceral adipose tissue | 0                   | 0    |
| Waist circumference     | 0                   | 4.9% |
| Smoking initiation      | 0                   | 1.8% |
| Lifetime smoking index  | 0                   | 0    |
| Alcohol drinking        | 0                   | 1.8% |
| Alcohol dependence      | 0                   | 0    |
| Coffee consumption      | 0                   | 0    |
| Caffeine consumption    | 0                   | 0.4% |
| Sports                  | 0                   | 0    |
| MVPA                    | 0                   | 0    |
| VPA                     | 0                   | 0    |
| Sedentary behavior      | 0                   | 0    |
| Leisure screen time     | 0                   | 0    |
| Sleep duration          | 0                   | 0    |
| Short sleep duration    | 0                   | 0    |
| Long sleep duration     | 0                   | 0    |
| Insomnia                | 0                   | 0    |

Note: CAD, coronary artery disease; MVPA, moderate to vigorous physical activity; VPA, vigorous physical activity.

**Supplemental Table 6.** The bias and type 1 error rate caused by the sample overlap.

| <b>Exposure</b>      | <b>Outcome</b> | <b>Overlap rate</b> | <b>Bias</b> | <b>Type 1 error rate</b> |
|----------------------|----------------|---------------------|-------------|--------------------------|
| Waist circumference  | CAD            | 4.9%                | <0.002      | 0.05                     |
| Smoking initiation   | CAD            | 1.8%                | <0.001      | 0.05                     |
| Alcohol drinking     | CAD            | 1.8%                | <0.001      | 0.05                     |
| Caffeine consumption | CAD            | 0.4%                | <0.001      | 0.05                     |

Note: CAD, coronary artery disease; MVPA, moderate to vigorous physical activity; VPA, vigorous physical activity.



**Supplemental Table 7.** Posterior probability of H3 and H4 in colocalization analysis.

| <b>UniProt</b> | <b>Protein</b> | <b>PP3+PP4</b> | <b>PP4/(PP3+PP4)</b> |
|----------------|----------------|----------------|----------------------|
| Q8NBP7         | PCSK9          | 1.00           | 1.00                 |
| Q9BY76         | ANGPTL4        | 1.00           | 1.00                 |
| P37802         | TAGLN2         | 1.00           | 1.00                 |
| P37802         | TAGLN2         | 1.00           | 1.00                 |
| Q13308         | PTK7           | 1.00           | 1.00                 |
| P21964         | COMT           | 1.00           | 0.99                 |
| P08887         | IL6R           | 1.00           | 0.99                 |
| P04114         | APOB           | 1.00           | 0.98                 |
| P09871         | C1S            | 1.00           | 0.96                 |
| P00736         | C1R            | 1.00           | 0.96                 |
| P01160         | NPPA           | 1.00           | 0.93                 |
| Q9NUM4         | TMEM106B       | 1.00           | 0.93                 |
| P08670         | VIM            | 0.95           | 0.96                 |
| Q99487         | PAFAH2         | 0.98           | 0.94                 |
| P13497         | BMP1           | 1.00           | 0.88                 |
| P22676         | CALB2          | 1.00           | 0.87                 |
| Q9NRN7         | AASDHPPT       | 0.94           | 0.89                 |
| Q6NW40         | RGMB           | 0.91           | 0.92                 |
| P02751         | FN1            | 0.96           | 0.87                 |
| P02751         | FN1            | 0.96           | 0.87                 |
| P35625         | TIMP3          | 0.94           | 0.89                 |
| P02751         | FN1            | 0.96           | 0.87                 |
| P38936         | CDKN1A         | 0.95           | 0.86                 |
| P36941         | LTBR           | 0.92           | 0.88                 |

Note: PP3, posterior probability of H3; PP4, posterior probability of H4.

**Supplemental Table 8.** Associations of genetically predicted obesity measures with CAD in sensitivity analyses.

| Exposure | SNPs | MR method       | OR   | 95% CI      | <i>P</i> <sub>Effect</sub> | <i>P</i> <sub>Heterogeneity</sub> | <i>P</i> <sub>Intercept</sub> |
|----------|------|-----------------|------|-------------|----------------------------|-----------------------------------|-------------------------------|
| BMI      | 311  | Weighted mode   | 1.42 | (1.22-1.65) | 8.6E-06                    |                                   |                               |
|          |      | MR Egger        | 1.43 | (1.22-1.68) | 1.4E-05                    | <0.001                            | 0.86                          |
|          |      | Simple median   | 1.43 | (1.33-1.53) | 5.7E-22                    |                                   |                               |
|          |      | Weighted median | 1.39 | (1.28-1.51) | 4.6E-14                    |                                   |                               |
| WHR      | 292  | Weighted mode   | 1.37 | (1.06-1.78) | 0.02                       |                                   |                               |
|          |      | MR Egger        | 1.40 | (1.07-1.84) | 0.02                       | <0.001                            | 0.72                          |
|          |      | Simple median   | 1.46 | (1.35-1.59) | 5.5E-19                    |                                   |                               |
|          |      | Weighted median | 1.41 | (1.29-1.55) | 2.5E-14                    |                                   |                               |
| WC       | 46   | Weighted mode   | 1.37 | (1.18-1.59) | 1.9E-04                    |                                   |                               |
|          |      | MR Egger        | 1.73 | (1.16-2.57) | 0.01                       | <0.001                            | 0.16                          |
|          |      | Simple median   | 1.33 | (1.18-1.50) | 2.0E-06                    |                                   |                               |
|          |      | Weighted median | 1.38 | (1.21-1.57) | 2.2E-06                    |                                   |                               |
| VAT      | 219  | Weighted mode   | 1.43 | (1.22-1.66) | 8.3E-06                    |                                   |                               |
|          |      | MR Egger        | 1.32 | (1.06-1.64) | 0.01                       | <0.001                            | 0.51                          |
|          |      | Simple median   | 1.39 | (1.29-1.49) | 2.9E-18                    |                                   |                               |
|          |      | Weighted median | 1.43 | (1.31-1.56) | 9.5E-16                    |                                   |                               |

Note: CAD, coronary artery disease; BMI, body mass index; WHR, waist-to-hip ratio; WC, waist circumference; VAT, visceral adipose tissue; OR, odds ratio; CI, confidence interval.

**Supplemental Table 9.** Associations of genetically predicted smoking, alcohol use and coffee consumption with CAD in sensitivity analyses.

| Exposure           | SNPs | MR method       | OR   | 95% CI      | <i>P</i> <sub>Effect</sub> | <i>P</i> <sub>Heterogeneity</sub> | <i>P</i> <sub>Intercept</sub> |
|--------------------|------|-----------------|------|-------------|----------------------------|-----------------------------------|-------------------------------|
| Smoking Initiation | 313  | Weighted mode   | 1.23 | (1.04-1.45) | 0.02                       |                                   |                               |
|                    |      | MR Egger        | 1.36 | (1.09-1.71) | 7.3E-03                    | <0.001                            | 0.42                          |
|                    |      | Simple median   | 1.24 | (1.17-1.32) | 3.1E-12                    |                                   |                               |
|                    |      | Weighted median | 1.24 | (1.16-1.32) | 1.1E-10                    |                                   |                               |
| Smoking Index      | 126  | Weighted mode   | 1.56 | (1.05-2.33) | 0.03                       |                                   |                               |
|                    |      | MR Egger        | 1.18 | (0.73-1.91) | 0.51                       | <0.001                            | 0.52                          |
|                    |      | Simple median   | 1.55 | (1.36-1.78) | 1.9E-10                    |                                   |                               |
|                    |      | Weighted median | 1.42 | (1.25-1.62) | 7.6E-08                    |                                   |                               |
| Alcohol Drinking   | 96   | Weighted mode   | 1.30 | (1.07-1.57) | 8.7E-03                    |                                   |                               |
|                    |      | MR Egger        | 1.22 | (0.86-1.74) | 0.26                       | <0.001                            | 0.53                          |
|                    |      | Simple median   | 1.21 | (1.00-1.46) | 0.05                       |                                   |                               |
|                    |      | Weighted median | 1.26 | (1.03-1.53) | 0.02                       |                                   |                               |
| Alcohol Dependence | 3    | Weighted mode   | 1.05 | (1.00-1.10) | 0.17                       |                                   |                               |
|                    |      | MR Egger        | 1.05 | (0.99-1.12) | 0.34                       | 0.62                              | 0.72                          |
|                    |      | Simple median   | 1.05 | (0.99-1.11) | 0.11                       |                                   |                               |
|                    |      | Weighted median | 1.05 | (1.00-1.10) | 0.03                       |                                   |                               |
| Coffee consumption | 12   | Weighted mode   | 1.00 | (1.00-1.01) | 0.02                       |                                   |                               |
|                    |      | MR Egger        | 1.17 | (0.79-1.72) | 0.46                       | <0.001                            | 0.75                          |
|                    |      | Simple median   | 1.00 | (1.00-1.01) | 0.24                       |                                   |                               |
|                    |      | Weighted median | 1.13 | (0.98-1.29) | 0.09                       |                                   |                               |

Note: CAD, coronary artery disease; OR, odds ratio; CI, confidence interval. The results for caffeine consumption with CAD using the weighted-median, MR-Egger regression, and weighted mode methods were not reported, due to the insufficient number of SNP.

**Supplemental Table 10.** Associations of genetically predicted sleep traits with CAD in sensitivity analyses.

| <b>Exposure</b>      | <b>SNPs</b> | <b>MR method</b> | <b>OR</b> | <b>95% CI</b> | <b><i>P</i><sub>Effect</sub></b> | <b><i>P</i><sub>Heterogeneity</sub></b> | <b><i>P</i><sub>Intercept</sub></b> |
|----------------------|-------------|------------------|-----------|---------------|----------------------------------|-----------------------------------------|-------------------------------------|
| Sleep Duration       | 73          | Weighted mode    | 0.73      | (0.53-1.01)   | 0.06                             |                                         |                                     |
|                      |             | MR Egger         | 0.76      | (0.40-1.47)   | 0.42                             | <0.001                                  | 0.88                                |
|                      |             | Simple median    | 0.74      | (0.63-0.89)   | 9.4E-04                          |                                         |                                     |
|                      |             | Weighted median  | 0.74      | (0.62-0.89)   | 1.1E-03                          |                                         |                                     |
| Short Sleep Duration | 26          | Weighted mode    | 1.35      | (1.04-1.75)   | 0.03                             |                                         |                                     |
|                      |             | MR Egger         | 1.20      | (0.72-1.99)   | 0.49                             | 0.00                                    | 0.92                                |
|                      |             | Simple median    | 1.29      | (1.14-1.47)   | 8.9E-05                          |                                         |                                     |
|                      |             | Weighted median  | 1.25      | (1.09-1.43)   | 1.0E-03                          |                                         |                                     |
| Long Sleep Duration  | 7           | Weighted mode    | 0.88      | (0.74-1.05)   | 0.21                             |                                         |                                     |
|                      |             | MR Egger         | 1.03      | (0.74-1.43)   | 0.88                             | 0.16                                    | 0.39                                |
|                      |             | Simple median    | 0.94      | (0.80-1.10)   | 0.45                             |                                         |                                     |
|                      |             | Weighted median  | 0.90      | (0.78-1.04)   | 0.14                             |                                         |                                     |
| Insomnia             | 208         | Weighted mode    | 1.09      | (0.99-1.20)   | 0.08                             |                                         |                                     |
|                      |             | MR Egger         | 1.03      | (0.91-1.18)   | 0.62                             | <0.001                                  | 0.45                                |
|                      |             | Simple median    | 1.09      | (1.05-1.12)   | 3.6E-06                          |                                         |                                     |
|                      |             | Weighted median  | 1.09      | (1.05-1.13)   | 1.0E-05                          |                                         |                                     |

Note: CAD, coronary artery disease; OR, odds ratio; CI, confidence interval.

**Supplemental Table 11.** Associations of genetically predicted physical activity and sedentary behavior with CAD in sensitivity analyses.

| Exposure            | SNPs | MR method       | OR   | 95% CI      | <i>P</i> <sub>Effect</sub> | <i>P</i> <sub>Heterogeneity</sub> | <i>P</i> <sub>Intercept</sub> |
|---------------------|------|-----------------|------|-------------|----------------------------|-----------------------------------|-------------------------------|
| Sports              | 5    | Weighted mode   | 0.92 | (0.72-1.17) | 0.52                       |                                   |                               |
|                     |      | MR Egger        | 0.98 | (0.56-1.73) | 0.96                       | 0.49                              | 0.67                          |
|                     |      | Simple median   | 0.88 | (0.70-1.11) | 0.28                       |                                   |                               |
|                     |      | Weighted median | 0.90 | (0.74-1.11) | 0.33                       |                                   |                               |
| MVPA                | 15   | Weighted mode   | 0.74 | (0.55-1.01) | 0.08                       |                                   |                               |
|                     |      | MR Egger        | 1.51 | (0.43-5.37) | 0.53                       | <0.001                            | 0.28                          |
|                     |      | Simple median   | 0.67 | (0.53-0.84) | 7.2E-04                    |                                   |                               |
|                     |      | Weighted median | 0.78 | (0.63-0.96) | 0.02                       |                                   |                               |
| VPA                 | 5    | Weighted mode   | 0.89 | (0.71-1.12) | 0.39                       |                                   |                               |
|                     |      | MR Egger        | 0.49 | (0.19-1.24) | 0.23                       | 0.80                              | 0.30                          |
|                     |      | Simple median   | 0.89 | (0.74-1.07) | 0.22                       |                                   |                               |
|                     |      | Weighted median | 0.89 | (0.75-1.06) | 0.19                       |                                   |                               |
| Sedentary behavior  | 133  | Weighted mode   | 1.40 | (1.06-1.84) | 0.02                       |                                   |                               |
|                     |      | MR Egger        | 1.89 | (1.18-3.01) | 8.5E-03                    | <0.001                            | 0.08                          |
|                     |      | Simple median   | 1.35 | (1.20-1.52) | 7.0E-07                    |                                   |                               |
|                     |      | Weighted median | 1.35 | (1.20-1.51) | 3.5E-07                    |                                   |                               |
| Leisure screen time | 129  | Weighted mode   | 1.06 | (0.86-1.30) | 0.60                       |                                   |                               |
|                     |      | MR Egger        | 0.76 | (0.56-1.03) | 0.08                       | <0.001                            | 0.004                         |
|                     |      | Simple median   | 1.16 | (1.08-1.25) | 3.6E-05                    |                                   |                               |
|                     |      | Weighted median | 1.16 | (1.08-1.25) | 6.9E-05                    |                                   |                               |

Note: CAD, coronary artery disease; MVPA, moderate to vigorous physical activity; VPA, vigorous physical activity; OR, odds ratio; CI, confidence interval.

**Supplemental Table 12.** Associations of genetically predicted obesity and lifestyle factors with CAD in MR-PRESSO Analyses.

| Trait                  | OR   | 95% CI       | <i>P</i> | Outlier | <i>P</i> <sub>distribution</sub> |
|------------------------|------|--------------|----------|---------|----------------------------------|
| BMI                    | 1.47 | (1.39, 1.55) | <0.001   | 14      | 0.20                             |
| WHR                    | 1.50 | (1.40, 1.61) | <0.001   | 22      | 0.55                             |
| WC                     | 1.34 | (1.24, 1.45) | <0.001   | 9       | 0.59                             |
| VAT                    | 1.45 | (1.36, 1.54) | <0.001   | 4       | 0.49                             |
| Smoking initiation     | 1.25 | (1.19, 1.31) | <0.001   | 5       | 0.99                             |
| Lifetime smoking index | 1.37 | (1.23, 1.53) | <0.001   | 2       | 0.99                             |
| Alcohol drinking       | 1.13 | (0.96, 1.33) | 0.146    | 2       | 0.88                             |
| Coffee consumption     | 1.22 | (1.08, 1.37) | 0.012    | 2       | 0.82                             |
| Sports                 | NA   | NA           | NA       | NA      | NA                               |
| MVPA                   | 0.69 | (0.57, 0.84) | 0.003    | 1       | 0.57                             |
| VPA                    | NA   | NA           | NA       | NA      | NA                               |
| Sedentary behavior     | 1.28 | (1.16, 1.40) | <0.001   | 3       | 0.75                             |
| Leisure screen time    | 1.19 | (1.12, 1.26) | <0.001   | 2       | 0.39                             |
| Sleep duration         | 0.79 | (0.68, 0.91) | 0.002    | 4       | 0.78                             |
| Long sleep duration    | NA   | NA           | NA       | NA      | NA                               |
| Short sleep duration   | NA   | NA           | NA       | NA      | NA                               |
| Insomnia               | 1.09 | (1.06, 1.12) | <0.001   | 5       | 0.94                             |

Note: BMI, body mass index; WHR, waist-to-hip ratio; WC, waist circumference; VAT, visceral adipose tissue; MVPA, moderate to vigorous physical activity; VPA, vigorous physical activity; OR, odds ratio; CI, confidence interval. *P*<sub>distribution</sub>, the *p* value of MR-PRESSO distribution test; NA, no outlier was found. The MR-PRESSO method was not available for caffeine consumption and alcohol dependence, due to the limited number of SNP.

**Supplemental Table 13.** Associations of genetically predicted obesity measures with levels of MAP1LC3A.

| <b>Exposure</b> | <b>nsnp</b> | <b>MR method</b> | <b>beta</b> | <b>se</b> | <b>pval</b> |
|-----------------|-------------|------------------|-------------|-----------|-------------|
| BMI             | 299         | Weighted mode    | 0.195       | 0.075     | 0.010       |
|                 |             | MR Egger         | 0.150       | 0.087     | 0.086       |
|                 |             | IVW              | 0.112       | 0.035     | 0.001       |
|                 |             | Simple median    | 0.097       | 0.047     | 0.038       |
|                 |             | Weighted median  | 0.165       | 0.052     | 0.001       |
| VAT             | 212         | Weighted mode    | 0.192       | 0.083     | 0.023       |
|                 |             | MR Egger         | 0.272       | 0.098     | 0.006       |
|                 |             | IVW              | 0.067       | 0.031     | 0.030       |
|                 |             | Simple median    | 0.096       | 0.046     | 0.035       |
|                 |             | Weighted median  | 0.161       | 0.050     | 0.001       |

Note: nsnp, number of single nucleotide polymorphisms; se, standard error; pval, *p* value; BMI, body mass index; WHR, waist-to-hip ratio; WC, waist circumference; VAT, visceral adipose tissue; IVW, Inverse variance weighted analysis.

**Supplemental Table 14.** Associations of genetically predicted obesity measures with levels of ANGPTL4.

| <b>Exposure</b> | <b>nsnp</b> | <b>MR method</b> | <b>beta</b> | <b>se</b> | <b>pval</b> |
|-----------------|-------------|------------------|-------------|-----------|-------------|
| BMI             | 299         | Weighted mode    | 0.184       | 0.077     | 0.017       |
|                 |             | MR Egger         | 0.221       | 0.076     | 0.004       |
|                 |             | IVW              | 0.108       | 0.029     | <0.001      |
|                 |             | Simple median    | 0.091       | 0.046     | 0.046       |
|                 |             | Weighted median  | 0.171       | 0.057     | 0.003       |
| WHR             | 280         | Weighted mode    | 0.135       | 0.087     | 0.122       |
|                 |             | MR Egger         | 0.075       | 0.087     | 0.391       |
|                 |             | IVW              | 0.081       | 0.033     | 0.014       |
|                 |             | Simple median    | 0.111       | 0.049     | 0.024       |
|                 |             | Weighted median  | 0.084       | 0.062     | 0.175       |
| VAT             | 212         | Weighted mode    | 0.164       | 0.092     | 0.075       |
|                 |             | MR Egger         | 0.318       | 0.098     | 0.001       |
|                 |             | IVW              | 0.098       | 0.031     | 0.001       |
|                 |             | Simple median    | 0.137       | 0.045     | 0.002       |
|                 |             | Weighted median  | 0.159       | 0.050     | 0.002       |

Note: nsnp, number of single nucleotide polymorphisms; se, standard error; pval, *p* value; BMI, body mass index; WHR, waist-to-hip ratio; WC, waist circumference; VAT, visceral adipose tissue; IVW, Inverse variance weighted analysis.



**Supplemental Table 15.** Associations of genetically predicted obesity measures with levels of RPS6KA1.

| <b>Exposure</b> | <b>nsnp</b> | <b>MR method</b> | <b>beta</b> | <b>se</b> | <b>pval</b> |
|-----------------|-------------|------------------|-------------|-----------|-------------|
| BMI             | 299         | Weighted mode    | 0.198       | 0.067     | 0.003       |
|                 |             | MR Egger         | 0.160       | 0.075     | 0.035       |
|                 |             | IVW              | 0.158       | 0.030     | <0.001      |
|                 |             | Simple median    | 0.183       | 0.043     | <0.001      |
|                 |             | Weighted median  | 0.191       | 0.048     | <0.001      |
| WHR             | 280         | Weighted mode    | 0.073       | 0.085     | 0.397       |
|                 |             | MR Egger         | 0.103       | 0.081     | 0.205       |
|                 |             | IVW              | 0.166       | 0.030     | <0.001      |
|                 |             | Simple median    | 0.158       | 0.043     | <0.001      |
|                 |             | Weighted median  | 0.110       | 0.048     | 0.022       |
| WC              | 45          | Weighted mode    | 0.199       | 0.073     | 0.010       |
|                 |             | MR Egger         | 0.337       | 0.121     | 0.008       |
|                 |             | IVW              | 0.091       | 0.042     | 0.029       |
|                 |             | Simple median    | 0.126       | 0.066     | 0.055       |
|                 |             | Weighted median  | 0.192       | 0.067     | 0.004       |
| VAT             | 212         | Weighted mode    | 0.192       | 0.076     | 0.013       |
|                 |             | MR Egger         | 0.282       | 0.085     | 0.001       |
|                 |             | IVW              | 0.136       | 0.027     | <0.001      |
|                 |             | Simple median    | 0.123       | 0.042     | 0.004       |
|                 |             | Weighted median  | 0.176       | 0.045     | <0.001      |

Note: nsnp, number of single nucleotide polymorphisms; se, standard error; pval, *p* value; BMI, body mass index; WHR, waist-to-hip ratio; WC, waist circumference; VAT, visceral adipose tissue; IVW, Inverse variance weighted analysis.

**Supplemental Table 16.** Associations of genetically predicted obesity measures with levels of PCSK9.

| <b>Exposure</b> | <b>nsnp</b> | <b>MR method</b> | <b>beta</b> | <b>se</b> | <b>pval</b> |
|-----------------|-------------|------------------|-------------|-----------|-------------|
| BMI             | 299         | Weighted mode    | 0.188       | 0.084     | 0.025       |
|                 |             | MR Egger         | 0.220       | 0.084     | 0.010       |
|                 |             | IVW              | 0.141       | 0.033     | <0.001      |
|                 |             | Simple median    | 0.163       | 0.047     | <0.001      |
|                 |             | Weighted median  | 0.185       | 0.056     | 0.001       |
| WHR             | 280         | Weighted mode    | 0.151       | 0.092     | 0.103       |
|                 |             | MR Egger         | 0.030       | 0.109     | 0.781       |
|                 |             | IVW              | 0.151       | 0.041     | <0.001      |
|                 |             | Simple median    | 0.137       | 0.053     | 0.010       |
|                 |             | Weighted median  | 0.177       | 0.069     | 0.011       |
| WC              | 45          | Weighted mode    | 0.201       | 0.095     | 0.039       |
|                 |             | MR Egger         | 0.235       | 0.175     | 0.186       |
|                 |             | IVW              | 0.124       | 0.048     | 0.010       |
|                 |             | Simple median    | 0.118       | 0.076     | 0.120       |
|                 |             | Weighted median  | 0.224       | 0.079     | 0.005       |
| VAT             | 212         | Weighted mode    | 0.245       | 0.104     | 0.019       |
|                 |             | MR Egger         | 0.422       | 0.104     | <0.001      |
|                 |             | IVW              | 0.166       | 0.031     | <0.001      |
|                 |             | Simple median    | 0.155       | 0.047     | 0.001       |
|                 |             | Weighted median  | 0.197       | 0.053     | <0.001      |

Note: nsnp, number of single nucleotide polymorphisms; se, standard error; pval, *p* value; BMI, body mass index; WHR, waist-to-hip ratio; WC, waist circumference; VAT, visceral adipose tissue; IVW, Inverse variance weighted analysis.

**Supplemental Table 17.** Associations of genetically predicted obesity measures with levels of ITPKA.

| <b>Exposure</b> | <b>nsnp</b> | <b>MR method</b> | <b>beta</b> | <b>se</b> | <b>pval</b> |
|-----------------|-------------|------------------|-------------|-----------|-------------|
| BMI             | 299         | Weighted mode    | 0.179       | 0.076     | 0.020       |
|                 |             | MR Egger         | 0.169       | 0.075     | 0.025       |
|                 |             | IVW              | 0.113       | 0.030     | <0.001      |
|                 |             | Simple median    | 0.109       | 0.045     | 0.015       |
|                 |             | Weighted median  | 0.134       | 0.046     | 0.003       |
| WHR             | 280         | Weighted mode    | 0.151       | 0.094     | 0.112       |
|                 |             | MR Egger         | 0.112       | 0.087     | 0.197       |
|                 |             | IVW              | 0.113       | 0.033     | 0.001       |
|                 |             | Simple median    | 0.134       | 0.050     | 0.007       |
|                 |             | Weighted median  | 0.162       | 0.061     | 0.008       |
| VAT             | 212         | Weighted mode    | 0.160       | 0.092     | 0.086       |
|                 |             | MR Egger         | 0.296       | 0.095     | 0.002       |
|                 |             | IVW              | 0.097       | 0.030     | 0.001       |
|                 |             | Simple median    | 0.094       | 0.046     | 0.039       |
|                 |             | Weighted median  | 0.123       | 0.045     | 0.007       |

Note: nsnp, number of single nucleotide polymorphisms; se, standard error; pval, *p* value; BMI, body mass index; WHR, waist-to-hip ratio; WC, waist circumference; VAT, visceral adipose tissue; IVW, Inverse variance weighted analysis.

**Supplemental Table 18.** Associations of genetically predicted physical activity with levels of circulating proteins.

| <b>Exposure</b> | <b>Protein</b> | <b>nsnp</b> | <b>MR method</b> | <b>beta</b> | <b>se</b> | <b>pval</b> |
|-----------------|----------------|-------------|------------------|-------------|-----------|-------------|
| Sports          | LGALS2         | 5           | Weighted mode    | 0.226       | 0.165     | 0.244       |
|                 |                |             | MR Egger         | 0.271       | 0.354     | 0.501       |
|                 |                |             | IVW              | 0.214       | 0.106     | 0.043       |
|                 |                |             | Simple median    | 0.222       | 0.133     | 0.096       |
|                 |                |             | Weighted median  | 0.228       | 0.128     | 0.075       |
| VPA             | CNP            | 5           | Weighted mode    | 0.300       | 0.165     | 0.142       |
|                 |                |             | MR Egger         | -0.199      | 0.668     | 0.785       |
|                 |                |             | IVW              | 0.234       | 0.094     | 0.012       |
|                 |                |             | Simple median    | 0.285       | 0.125     | 0.023       |
|                 |                |             | Weighted median  | 0.264       | 0.124     | 0.033       |

Note: nsnp, number of single nucleotide polymorphisms; se, standard error; pval, *p* value; VPA, vigorous physical activity; IVW, Inverse variance weighted analysis.

**Supplemental Table 19.** Associations of genetically predicted sedentary behavior with levels of circulating proteins.

| <b>Exposure</b> | <b>Protein</b> | <b>nsnp</b> | <b>MR method</b> | <b>beta</b> | <b>se</b> | <b>pval</b> |
|-----------------|----------------|-------------|------------------|-------------|-----------|-------------|
| SB              | PCSK9          | 123         | Weighted mode    | 0.167       | 0.174     | 0.338       |
|                 |                |             | MR Egger         | 0.131       | 0.240     | 0.585       |
|                 |                |             | IVW              | 0.145       | 0.052     | 0.005       |
|                 |                |             | Simple median    | 0.114       | 0.074     | 0.120       |
|                 |                |             | Weighted median  | 0.112       | 0.071     | 0.115       |
| SB              | MST1           | 123         | Weighted mode    | -0.024      | 0.126     | 0.849       |
|                 |                |             | MR Egger         | 7.161       | 1.496     | <0.001      |
|                 |                |             | IVW              | 0.911       | 0.037     | <0.001      |
|                 |                |             | Simple median    | -0.024      | 0.056     | 0.675       |
|                 |                |             | Weighted median  | -0.011      | 0.056     | 0.849       |
| LST             | RPS6KA1        | 122         | Weighted mode    | 0.148       | 0.123     | 0.228       |
|                 |                |             | MR Egger         | 0.195       | 0.132     | 0.143       |
|                 |                |             | IVW              | 0.084       | 0.028     | 0.003       |
|                 |                |             | Simple median    | 0.099       | 0.042     | 0.019       |
|                 |                |             | Weighted median  | 0.100       | 0.042     | 0.017       |
| LST             | MST1           | 122         | Weighted mode    | 0.072       | 0.075     | 0.337       |
|                 |                |             | MR Egger         | 2.092       | 0.885     | 0.020       |
|                 |                |             | IVW              | 0.460       | 0.023     | <0.001      |
|                 |                |             | Simple median    | 0.051       | 0.035     | 0.145       |
|                 |                |             | Weighted median  | 0.055       | 0.033     | 0.091       |

Note: nsnp, number of single nucleotide polymorphisms; se, standard error; pval, *p* value; SB, sedentary behavior; LST, leisure screen time; IVW, Inverse variance weighted analysis.

**Supplemental Table 20.** Associations of genetically predicted smoking with levels of circulating proteins.

| <b>Exposure</b>    | <b>Protein</b> | <b>nsnp</b> | <b>MR method</b> | <b>beta</b> | <b>se</b> | <b>pval</b> |
|--------------------|----------------|-------------|------------------|-------------|-----------|-------------|
| Smoking initiation | RGMB           | 303         | Weighted mode    | -0.216      | 0.114     | 0.059       |
|                    |                |             | MR Egger         | 0.066       | 0.122     | 0.588       |
|                    |                |             | IVW              | -0.121      | 0.029     | <0.001      |
|                    |                |             | Simple median    | -0.173      | 0.041     | <0.001      |
|                    |                |             | Weighted median  | -0.161      | 0.040     | <0.001      |
| Smoking initiation | PCSK9          | 303         | Weighted mode    | -0.034      | 0.122     | 0.780       |
|                    |                |             | MR Egger         | 0.106       | 0.120     | 0.379       |
|                    |                |             | IVW              | 0.077       | 0.029     | 0.007       |
|                    |                |             | Simple median    | 0.068       | 0.040     | 0.086       |
|                    |                |             | Weighted median  | 0.050       | 0.040     | 0.209       |
| Smoking index      | ITPKA          | 122         | Weighted mode    | 0.229       | 0.199     | 0.252       |
|                    |                |             | MR Egger         | -0.176      | 0.208     | 0.401       |
|                    |                |             | IVW              | 0.142       | 0.054     | 0.009       |
|                    |                |             | Simple median    | 0.217       | 0.078     | 0.006       |
|                    |                |             | Weighted median  | 0.186       | 0.081     | 0.021       |
| Smoking index      | PCSK9          | 122         | Weighted mode    | 0.115       | 0.206     | 0.576       |
|                    |                |             | MR Egger         | -0.269      | 0.221     | 0.226       |
|                    |                |             | IVW              | 0.168       | 0.058     | 0.004       |
|                    |                |             | Simple median    | 0.170       | 0.080     | 0.034       |
|                    |                |             | Weighted median  | 0.112       | 0.083     | 0.179       |
| Smoking index      | RPS6KA1        | 122         | Weighted mode    | -0.083      | 0.191     | 0.664       |
|                    |                |             | MR Egger         | -0.041      | 0.210     | 0.846       |
|                    |                |             | IVW              | 0.162       | 0.055     | 0.003       |
|                    |                |             | Simple median    | 0.142       | 0.074     | 0.056       |
|                    |                |             | Weighted median  | 0.089       | 0.075     | 0.232       |

Note: nsnp, number of single nucleotide polymorphisms; se, standard error; pval, *p* value; IVW, Inverse variance weighted analysis.

**Supplemental Table 21.** Associations of genetically predicted coffee and caffeine consumption with levels of circulating proteins.

| Exposure             | Protein  | nsnp | MR method       | beta   | se    | pval   |
|----------------------|----------|------|-----------------|--------|-------|--------|
| Coffee consumption   | MAP1LC3A | 12   | Weighted mode   | 0.084  | 0.072 | 0.270  |
|                      |          |      | MR Egger        | 0.017  | 0.115 | 0.883  |
|                      |          |      | IVW             | 0.119  | 0.060 | 0.047  |
|                      |          |      | Simple median   | 0.156  | 0.100 | 0.121  |
|                      |          |      | Weighted median | 0.075  | 0.077 | 0.328  |
| Coffee consumption   | FAS      | 12   | Weighted mode   | 0.186  | 0.071 | 0.023  |
|                      |          |      | MR Egger        | 0.075  | 0.221 | 0.741  |
|                      |          |      | IVW             | 0.324  | 0.060 | <0.001 |
|                      |          |      | Simple median   | 0.412  | 0.143 | 0.004  |
|                      |          |      | Weighted median | 0.180  | 0.078 | 0.022  |
| Caffeine consumption | APOB     | 2    | IVW             | 0.089  | 0.006 | <0.001 |
| Caffeine consumption | VIM      | 2    | IVW             | -0.036 | 0.005 | <0.001 |
| Caffeine consumption | FAS      | 2    | IVW             | 0.078  | 0.001 | <0.001 |

Note: nsnp, number of single nucleotide polymorphisms; se, standard error; pval, *p* value; IVW, Inverse variance weighted analysis. The associations of caffeine consumption with APOB, VIM, and FAS were only analyzed by the IVW method due to the limited number of SNPs (<3).

**Supplemental Table 22.** The estimates of the indirect effect and proportion mediated.

| Exposure | Mediator | Indirect effect | Proportion mediated | 95% CI        |
|----------|----------|-----------------|---------------------|---------------|
| BMI      | MAP1LC3A | 0.057           | 16.5%               | (4.3%, 28.6%) |
| BMI      | ANGPTL4  | 0.036           | 10.3%               | (3.6%, 16.9%) |
| BMI      | RPS6KA1  | 0.035           | 10.1%               | (3.4%, 16.7%) |
| BMI      | PCSK9    | 0.035           | 10.0%               | (5.0%, 14.9%) |
| BMI      | ITPKA    | 0.034           | 9.8%                | (2.4%, 17.3%) |
| BMI      | AGER     | 0.021           | 6.0%                | (2.5%, 9.4%)  |
| BMI      | RGMB     | 0.020           | 5.7%                | (1.6%, 9.8%)  |
| BMI      | C1R      | 0.013           | 3.7%                | (1.7%, 5.8%)  |
| BMI      | FAS      | 0.011           | 3.1%                | (0.8%, 5.3%)  |
| BMI      | MST1     | 0.010           | 2.9%                | (0.5%, 5.4%)  |
| BMI      | C1S      | 0.008           | 2.4%                | (1.1%, 3.7%)  |
| BMI      | GCA      | 0.008           | 2.4%                | (0.5%, 4.3%)  |
| BMI      | APOA5    | 0.006           | 1.7%                | (0.6%, 2.9%)  |
| WHR      | PCSK9    | 0.037           | 9.6%                | (4.2%, 15.0%) |
| WHR      | RPS6KA1  | 0.037           | 9.6%                | (3.3%, 15.8%) |
| WHR      | ITPKA    | 0.034           | 8.8%                | (1.8%, 15.9%) |
| WHR      | ANGPTL4  | 0.027           | 6.9%                | (0.8%, 13.1%) |
| WHR      | AGER     | 0.017           | 4.5%                | (1.5%, 7.5%)  |
| WHR      | RGMB     | 0.017           | 4.4%                | (0.7%, 8.1%)  |
| WHR      | AGT      | 0.014           | 3.8%                | (0.8%, 6.7%)  |
| WHR      | APOA5    | 0.012           | 3.1%                | (1.5%, 4.6%)  |



|                    |         |       |       |               |
|--------------------|---------|-------|-------|---------------|
| WHR                | C1R     | 0.007 | 1.8%  | (0.2%, 3.4%)  |
| WHR                | FAS     | 0.007 | 1.7%  | (0.1%, 3.4%)  |
| WHR                | C1S     | 0.006 | 1.7%  | (0.6%, 2.7%)  |
| WHR                | GCA     | 0.006 | 1.6%  | (0.1%, 3.2%)  |
| WHR                | LAMC2   | 0.003 | 0.7%  | (0.0%, 1.4%)  |
| WC                 | AGER    | 0.028 | 10.1% | (4.0%, 16.3%) |
| WC                 | RGMB    | 0.020 | 7.2%  | (0.9%, 13.5%) |
| WC                 | C1S     | 0.006 | 2.3%  | (0.3%, 4.4%)  |
| VAT                | PCSK9   | 0.041 | 11.8% | (6.6%, 17.0%) |
| VAT                | PTK7    | 0.037 | 10.6% | (2.9%, 18.4%) |
| VAT                | ANGPTL4 | 0.032 | 9.4%  | (2.4%, 16.4%) |
| VAT                | RPS6KA1 | 0.030 | 8.8%  | (2.8%, 14.7%) |
| VAT                | ITPKA   | 0.029 | 8.5%  | (1.4%, 15.6%) |
| VAT                | AGER    | 0.017 | 5.0%  | (1.9%, 8.1%)  |
| VAT                | C1R     | 0.015 | 4.4%  | (2.1%, 6.7%)  |
| VAT                | RGMB    | 0.013 | 3.7%  | (0.2%, 7.2%)  |
| VAT                | FAS     | 0.012 | 3.5%  | (1.0%, 6.0%)  |
| VAT                | MST1    | 0.012 | 3.4%  | (0.5%, 6.3%)  |
| VAT                | C1S     | 0.008 | 2.3%  | (1.1%, 3.6%)  |
| VAT                | GCA     | 0.007 | 2.0%  | (0.3%, 3.8%)  |
| VAT                | APOA5   | 0.007 | 1.9%  | (0.6%, 3.2%)  |
| VAT                | LAMC2   | 0.003 | 1.0%  | (0.2%, 1.8%)  |
| Smoking Initiation | RGMB    | 0.020 | 9.0%  | (2.8%, 15.2%) |
| Smoking Initiation | PCSK9   | 0.019 | 8.5%  | (2.1%, 14.9%) |
| Smoking Initiation | AGER    | 0.008 | 3.7%  | (0.7%, 6.7%)  |

|                      |          |       |       |                |
|----------------------|----------|-------|-------|----------------|
| Smoking Initiation   | MST1     | 0.007 | 3.2%  | (0.1%, 6.3%)   |
| Smoking Index        | ITPKA    | 0.043 | 13.4% | (0.8%, 26.0%)  |
| Smoking Index        | PCSK9    | 0.041 | 12.9% | (3.8%, 22.0%)  |
| Smoking Index        | RPS6KA1  | 0.036 | 11.3% | (1.6%, 21.0%)  |
| Smoking Index        | C1S      | 0.009 | 2.7%  | (0.7%, 4.7%)   |
| Alcohol Dependence   | ARG1     | 0.010 | 25.0% | (1.8%, 48.1%)  |
| Alcohol Dependence   | FN1      | 0.010 | 24.8% | (1.2%, 48.5%)  |
| Alcohol Dependence   | TIMP3    | 0.001 | 3.0%  | (1.4%, 4.6%)   |
| Coffee consumption   | MAP1LC3A | 0.001 | 29.0% | (2.5%, 55.4%)  |
| Coffee consumption   | FAS      | 0.000 | 10.0% | (0.6%, 19.4%)  |
| Caffeine consumption | APOB     | 0.042 | 33.5% | (20.5%, 46.6%) |
| Caffeine consumption | VIM      | 0.012 | 9.9%  | (4.7%, 15.2%)  |
| Caffeine consumption | FAS      | 0.005 | 4.1%  | (1.6%, 6.5%)   |
| Caffeine consumption | THSD1    | 0.004 | 3.5%  | (1.4%, 5.6%)   |
| Caffeine consumption | ANGPTL1  | 0.004 | 3.5%  | (0.7%, 6.2%)   |
| Caffeine consumption | CD14     | 0.004 | 3.5%  | (1.3%, 5.6%)   |
| Caffeine consumption | IL6R     | 0.003 | 2.1%  | (0.9%, 3.3%)   |
| Caffeine consumption | MTHFSD   | 0.001 | 1.2%  | (0.5%, 1.8%)   |
| Short Sleep Duration | CHL1     | 0.015 | 7.3%  | (0.3%, 14.3%)  |
| Insomnia             | PCSK9    | 0.008 | 10.0% | (0.5%, 19.5%)  |
| Sports               | VIM      | 0.054 | 36.8% | (16.4%, 57.2%) |
| Sports               | LGALS2   | 0.020 | 13.9% | (3.6%, 24.2%)  |
| Sports               | THSD1    | 0.011 | 7.2%  | (1.6%, 12.8%)  |
| VPA                  | CNP      | 0.066 | 49.9% | (12.3%, 87.4%) |
| VPA                  | ARG1     | 0.036 | 27.2% | (2.2%, 52.2%)  |

|                     |         |       |       |               |
|---------------------|---------|-------|-------|---------------|
| VPA                 | TIRAP   | 0.025 | 19.0% | (1.5%, 36.5%) |
| VPA                 | MTHFSD  | 0.017 | 13.2% | (1.6%, 24.8%) |
| VPA                 | UGDH    | 0.017 | 13.1% | (1.7%, 24.6%) |
| VPA                 | SWAP70  | 0.017 | 13.1% | (3.6%, 22.5%) |
| VPA                 | AGER    | 0.015 | 11.3% | (3.3%, 19.2%) |
| VPA                 | TIMP3   | 0.009 | 6.6%  | (2.2%, 11.0%) |
| VPA                 | CD14    | 0.008 | 6.1%  | (1.2%, 11.1%) |
| Sedentary behaviour | PCSK9   | 0.035 | 15.4% | (5.3%, 25.6%) |
| Sedentary behaviour | MST1    | 0.022 | 9.4%  | (1.2%, 17.6%) |
| Sedentary behaviour | APOA5   | 0.008 | 3.5%  | (0.6%, 6.5%)  |
| Sedentary behaviour | C1S     | 0.006 | 2.7%  | (0.3%, 5.1%)  |
| Leisure screen time | RPS6KA1 | 0.019 | 13.4% | (1.4%, 25.3%) |
| Leisure screen time | MST1    | 0.011 | 7.8%  | (0.3%, 15.4%) |
| Leisure screen time | C1R     | 0.006 | 4.6%  | (0.4%, 8.8%)  |
| Leisure screen time | C1S     | 0.004 | 3.1%  | (0.4%, 5.8%)  |

Note: BMI, body mass index; WHR, waist-to-hip ratio; WC, waist circumference; VAT, visceral adipose tissue; VPA, vigorous physical activity.

**Supplemental Table 23.** The statistical power of Mendelian randomization analyses.

| <b>Exposure</b>         | <b>Outcome</b>          | <b>Statistical power</b> |
|-------------------------|-------------------------|--------------------------|
| Body mass index         | coronary artery disease | 100%                     |
| Waist-to-hip ratio      | coronary artery disease | 100%                     |
| Visceral adipose tissue | coronary artery disease | 100%                     |
| Waist circumference     | coronary artery disease | 100%                     |
| Smoking initiation      | coronary artery disease | 100%                     |
| Lifetime smoking index  | coronary artery disease | 100%                     |
| Alcohol drinking        | coronary artery disease | 84%                      |
| Alcohol dependence      | coronary artery disease | 97%                      |
| Coffee consumption      | coronary artery disease | 100%                     |
| Caffeine consumption    | coronary artery disease | 100%                     |
| Sports                  | coronary artery disease | 57%                      |
| MVPA                    | coronary artery disease | 100%                     |
| VPA                     | coronary artery disease | 59%                      |
| Sedentary behavior      | coronary artery disease | 100%                     |
| Leisure screen time     | coronary artery disease | 100%                     |
| Sleep duration          | coronary artery disease | 100%                     |
| Short sleep duration    | coronary artery disease | 100%                     |
| Long sleep duration     | coronary artery disease | 81%                      |
| Insomnia                | coronary artery disease | 100%                     |
| Body mass index         | MAP1LC3A                | 99%                      |

|                         |          |      |
|-------------------------|----------|------|
| Body mass index         | ANGPTL4  | 98%  |
| Body mass index         | RPS6KA1  | 100% |
| Body mass index         | PCSK9    | 100% |
| Body mass index         | ITPKA    | 99%  |
| Waist-to-hip ratio      | ANGPTL4  | 77%  |
| Waist-to-hip ratio      | RPS6KA1  | 100% |
| Waist-to-hip ratio      | PCSK9    | 100% |
| Waist-to-hip ratio      | ITPKA    | 97%  |
| Waist circumference     | RPS6KA1  | 58%  |
| Waist circumference     | PCSK9    | 84%  |
| Visceral adipose tissue | MAP1LC3A | 69%  |
| Visceral adipose tissue | ANGPTL4  | 95%  |
| Visceral adipose tissue | RPS6KA1  | 100% |
| Visceral adipose tissue | PCSK9    | 100% |
| Visceral adipose tissue | ITPKA    | 95%  |
| Sports                  | LGALS2   | 55%  |
| VPA                     | CNP      | 81%  |
| SB                      | PCSK9    | 90%  |
| SB                      | MST1     | 100% |
| LST                     | RPS6KA1  | 84%  |
| LST                     | MST1     | 100% |
| Smoking initiation      | RGMB     | 100% |
| Smoking initiation      | PCSK9    | 88%  |

|                    |          |      |
|--------------------|----------|------|
| Smoking index      | ITPKA    | 81%  |
| Smoking index      | PCSK9    | 93%  |
| Smoking index      | RPS6KA1  | 91%  |
| Coffee consumption | MAP1LC3A | 57%  |
| Coffee consumption | FAS      | 100% |

Note: MVPA, moderate to vigorous physical activity; VPA, vigorous physical activity.
